# Supplementary material for: The MITF-SOX10 regulated long non-coding RNA DIRC3 is a melanoma tumour suppressor
Source: PLoS Genet. 2019 Dec 27;15(12):e1008501. doi: 10.1371/journal.pgen.1008501 (PMC6934268; doi:10.1371/journal.pgen.1008501)
Supplement: S1 Table — (XLSX) [file pgen.1008501.s005.xlsx]

## Sheet: S1 Table MelanomaLncRNAs
S1 Table: All melanocyte and/or melanoma expressed lncRNAs
chromosome	start	end	width	strand	source	type	score	phase	exon_number	exon_status	oId	gene_id	tss_id	transcript_id	class_code
chr1	11869	12227	359	+	intergenic	exon	NA	NA	1	m	ENST00000456328	NONCO1	TSS1	TCONS_00000001	.
chr1	12613	12721	109	+	intergenic	exon	NA	NA	2	m	ENST00000456328	NONCO1	TSS1	TCONS_00000001	.
chr1	13221	14409	1189	+	intergenic	exon	NA	NA	3	m	ENST00000456328	NONCO1	TSS1	TCONS_00000001	.
chr1	11872	12227	356	+	intergenic	exon	NA	NA	1	m	ENST00000515242	NONCO1	TSS1	TCONS_00000002	.
chr1	12613	12721	109	+	intergenic	exon	NA	NA	2	m	ENST00000515242	NONCO1	TSS1	TCONS_00000002	.
chr1	13225	14412	1188	+	intergenic	exon	NA	NA	3	m	ENST00000515242	NONCO1	TSS1	TCONS_00000002	.
chr1	11874	12227	354	+	intergenic	exon	NA	NA	1	m	ENST00000518655	NONCO1	TSS1	TCONS_00000003	.
chr1	12595	12721	127	+	intergenic	exon	NA	NA	2	m	ENST00000518655	NONCO1	TSS1	TCONS_00000003	.
chr1	13403	13655	253	+	intergenic	exon	NA	NA	3	m	ENST00000518655	NONCO1	TSS1	TCONS_00000003	.
chr1	13661	14409	749	+	intergenic	exon	NA	NA	4	m	ENST00000518655	NONCO1	TSS1	TCONS_00000003	.
chr1	12010	12057	48	+	intergenic	exon	NA	NA	1	m	ENST00000450305	NONCO1	TSS2	TCONS_00000004	.
chr1	12179	12227	49	+	intergenic	exon	NA	NA	2	m	ENST00000450305	NONCO1	TSS2	TCONS_00000004	.
chr1	12613	12697	85	+	intergenic	exon	NA	NA	3	m	ENST00000450305	NONCO1	TSS2	TCONS_00000004	.
chr1	12975	13052	78	+	intergenic	exon	NA	NA	4	m	ENST00000450305	NONCO1	TSS2	TCONS_00000004	.
chr1	13221	13374	154	+	intergenic	exon	NA	NA	5	m	ENST00000450305	NONCO1	TSS2	TCONS_00000004	.
chr1	13453	13670	218	+	intergenic	exon	NA	NA	6	m	ENST00000450305	NONCO1	TSS2	TCONS_00000004	.
chr1	752751	753582	832	+	intergenic	exon	NA	NA	1	m	ENST00000326734	NONCO10	TSS55	TCONS_00000065	.
chr1	754103	755214	1112	+	intergenic	exon	NA	NA	2	m	ENST00000326734	NONCO10	TSS55	TCONS_00000065	.
chr1	21059373	21059518	146	+	antisense_upstream	exon	NA	NA	1	m	ENST00000436642	NONCO100	TSS997	TCONS_00001156	.
chr1	21060293	21060445	153	+	antisense_upstream	exon	NA	NA	2	m	ENST00000436642	NONCO100	TSS997	TCONS_00001156	.
chr1	71181616	71181959	344	-	intergenic	exon	NA	NA	1	m	ENST00000423187	NONCO1001	TSS9959	TCONS_00012332	r
chr1	71185885	71185972	88	-	intergenic	exon	NA	NA	2	m	ENST00000423187	NONCO1001	TSS9959	TCONS_00012332	r
chr1	73214604	73214711	108	-	intergenic	exon	NA	NA	1	m	ENST00000445976	NONCO1003	TSS9979	TCONS_00012363	r
chr1	73214849	73214959	111	-	intergenic	exon	NA	NA	2	m	ENST00000445976	NONCO1003	TSS9979	TCONS_00012363	r
chr1	73316433	73316483	51	-	intergenic	exon	NA	NA	3	m	ENST00000445976	NONCO1003	TSS9979	TCONS_00012363	r
chr1	73364450	73364566	117	-	intergenic	exon	NA	NA	4	m	ENST00000445976	NONCO1003	TSS9979	TCONS_00012363	r
chr1	73364712	73364823	112	-	intergenic	exon	NA	NA	5	m	ENST00000445976	NONCO1003	TSS9979	TCONS_00012363	r
chr1	76175688	76176245	558	-	antisense_upstream	exon	NA	NA	1	m	ENST00000433521	NONCO1007	TSS10005	TCONS_00012396	r
chr1	76186034	76186090	57	-	antisense_upstream	exon	NA	NA	2	m	ENST00000433521	NONCO1007	TSS10005	TCONS_00012396	r
chr1	76189353	76189473	121	-	antisense_upstream	exon	NA	NA	3	m	ENST00000433521	NONCO1007	TSS10005	TCONS_00012396	r
chr1	76189627	76189696	70	-	antisense_upstream	exon	NA	NA	4	m	ENST00000433521	NONCO1007	TSS10005	TCONS_00012396	r
chr1	77223809	77223853	45	-	intergenic	exon	NA	NA	1	m	ENST00000427806	NONCO1008	TSS10043	TCONS_00012408	.
chr1	77223965	77224089	125	-	intergenic	exon	NA	NA	2	m	ENST00000427806	NONCO1008	TSS10043	TCONS_00012408	.
chr1	77244675	77244952	278	-	intergenic	exon	NA	NA	3	m	ENST00000427806	NONCO1008	TSS10043	TCONS_00012408	.
chr1	78409740	78409954	215	-	antisense_downstream	exon	NA	NA	1	m	ENST00000483894	NONCO1010	TSS10096	TCONS_00012450	.
chr1	78411191	78411580	390	-	antisense_downstream	exon	NA	NA	2	m	ENST00000483894	NONCO1010	TSS10096	TCONS_00012450	.
chr1	78409740	78409954	215	-	antisense_downstream	exon	NA	NA	1	m	ENST00000480673	NONCO1010	TSS10097	TCONS_00012451	.
chr1	78412215	78412261	47	-	antisense_downstream	exon	NA	NA	2	m	ENST00000480673	NONCO1010	TSS10097	TCONS_00012451	.
chr1	80839049	80839443	395	-	intergenic	exon	NA	NA	1	m	ENST00000458146	NONCO1011	TSS10132	TCONS_00012474	.
chr1	80840122	80840306	185	-	intergenic	exon	NA	NA	2	m	ENST00000458146	NONCO1011	TSS10132	TCONS_00012474	.
chr1	81000663	81000937	275	-	intergenic	exon	NA	NA	1	m	ENST00000437080	NONCO1012	TSS10135	TCONS_00012477	.
chr1	81049975	81050048	74	-	intergenic	exon	NA	NA	2	m	ENST00000437080	NONCO1012	TSS10135	TCONS_00012477	.
chr1	82680904	82681456	553	-	intergenic	exon	NA	NA	1	m	ENST00000420549	NONCO1015	TSS10144	TCONS_00012483	.
chr1	82726700	82726817	118	-	intergenic	exon	NA	NA	2	m	ENST00000420549	NONCO1015	TSS10144	TCONS_00012483	.
chr1	83439565	83440801	1237	-	intergenic	exon	NA	NA	1	m	ENST00000452834	NONCO1016	TSS10145	TCONS_00012484	r
chr1	83444744	83444969	226	-	intergenic	exon	NA	NA	2	m	ENST00000452834	NONCO1016	TSS10145	TCONS_00012484	r
chr1	83450543	83450605	63	-	intergenic	exon	NA	NA	3	m	ENST00000452834	NONCO1016	TSS10145	TCONS_00012484	r
chr1	83439612	83440801	1190	-	intergenic	exon	NA	NA	1	m	ENST00000421931	NONCO1016	TSS10146	TCONS_00012485	r
chr1	83444744	83444969	226	-	intergenic	exon	NA	NA	2	m	ENST00000421931	NONCO1016	TSS10146	TCONS_00012485	r
chr1	83451832	83451891	60	-	intergenic	exon	NA	NA	3	m	ENST00000421931	NONCO1016	TSS10146	TCONS_00012485	r
chr1	84481548	84481708	161	-	intergenic	exon	NA	NA	1	m	ENST00000421341	NONCO1019	TSS10164	TCONS_00012508	.
chr1	84481982	84482342	361	-	intergenic	exon	NA	NA	2	m	ENST00000421341	NONCO1019	TSS10164	TCONS_00012508	.
chr1	84482677	84483159	483	-	intergenic	exon	NA	NA	3	m	ENST00000421341	NONCO1019	TSS10164	TCONS_00012508	.
chr1	84483369	84483581	213	-	intergenic	exon	NA	NA	4	m	ENST00000421341	NONCO1019	TSS10164	TCONS_00012508	.
chr1	84483872	84484054	183	-	intergenic	exon	NA	NA	5	m	ENST00000421341	NONCO1019	TSS10164	TCONS_00012508	.
chr1	87819207	87819550	344	-	antisense_downstream	exon	NA	NA	1	m	ENST00000452509	NONCO1032	TSS10254	TCONS_00012621	.
chr1	87820527	87820881	355	-	antisense_downstream	exon	NA	NA	2	m	ENST00000452509	NONCO1032	TSS10254	TCONS_00012621	.
chr1	87823259	87823361	103	-	antisense_downstream	exon	NA	NA	3	m	ENST00000452509	NONCO1032	TSS10254	TCONS_00012621	.
chr1	87837252	87837338	87	-	antisense_downstream	exon	NA	NA	4	m	ENST00000452509	NONCO1032	TSS10254	TCONS_00012621	.
chr1	88365592	88365924	333	-	intergenic	exon	NA	NA	1	m	ENST00000437598	NONCO1033	TSS10258	TCONS_00012623	.
chr1	88369582	88369760	179	-	intergenic	exon	NA	NA	2	m	ENST00000437598	NONCO1033	TSS10258	TCONS_00012623	.
chr1	88371123	88371397	275	-	intergenic	exon	NA	NA	3	m	ENST00000437598	NONCO1033	TSS10258	TCONS_00012623	.
chr1	90976467	90976542	76	-	intergenic	exon	NA	NA	1	m	ENST00000435832	NONCO1036	TSS10302	TCONS_00012686	.
chr1	90977544	90977565	22	-	intergenic	exon	NA	NA	2	m	ENST00000435832	NONCO1036	TSS10302	TCONS_00012686	.
chr1	90979539	90979566	28	-	intergenic	exon	NA	NA	3	m	ENST00000435832	NONCO1036	TSS10302	TCONS_00012686	.
chr1	90998925	90999029	105	-	intergenic	exon	NA	NA	4	m	ENST00000435832	NONCO1036	TSS10302	TCONS_00012686	.
chr1	91248543	91248980	438	-	intergenic	exon	NA	NA	1	m	ENST00000435649	NONCO1037	TSS10304	TCONS_00012688	.
chr1	91254955	91255044	90	-	intergenic	exon	NA	NA	2	m	ENST00000435649	NONCO1037	TSS10304	TCONS_00012688	.
chr1	91297487	91297753	267	-	intergenic	exon	NA	NA	3	m	ENST00000435649	NONCO1037	TSS10304	TCONS_00012688	.
chr1	91317040	91317072	33	-	intergenic	exon	NA	NA	4	m	ENST00000435649	NONCO1037	TSS10304	TCONS_00012688	.
chr1	91295104	91297753	2650	-	intergenic	exon	NA	NA	1	m	ENST00000455680	NONCO1037	TSS10305	TCONS_00012689	.
chr1	91301383	91301718	336	-	intergenic	exon	NA	NA	2	m	ENST00000455680	NONCO1037	TSS10305	TCONS_00012689	.
chr1	91295104	91297753	2650	-	intergenic	exon	NA	NA	1	m	ENST00000606660	NONCO1037	TSS10306	TCONS_00012690	.
chr1	91317040	91317175	136	-	intergenic	exon	NA	NA	2	m	ENST00000606660	NONCO1037	TSS10306	TCONS_00012690	.
chr1	91297426	91297753	328	-	intergenic	exon	NA	NA	1	m	ENST00000443802	NONCO1037	TSS10306	TCONS_00012691	.
chr1	91303107	91303322	216	-	intergenic	exon	NA	NA	2	m	ENST00000443802	NONCO1037	TSS10306	TCONS_00012691	.
chr1	91317040	91317207	168	-	intergenic	exon	NA	NA	3	m	ENST00000443802	NONCO1037	TSS10306	TCONS_00012691	.
chr1	91326107	91326921	815	-	intergenic	exon	NA	NA	1	m	ENST00000606898	NONCO1038	TSS10307	TCONS_00012692	r
chr1	91328414	91328477	64	-	intergenic	exon	NA	NA	2	m	ENST00000606898	NONCO1038	TSS10307	TCONS_00012692	r
chr1	94388130	94389096	967	-	intergenic	exon	NA	NA	1	m	ENST00000417020	NONCO1043	TSS10414	TCONS_00012813	.
chr1	94389411	94389501	91	-	intergenic	exon	NA	NA	2	m	ENST00000417020	NONCO1043	TSS10414	TCONS_00012813	.
chr1	94614544	94616071	1528	-	intergenic	exon	NA	NA	1	m	ENST00000546444	NONCO1044	TSS10430	TCONS_00012831	r
chr1	94620107	94620385	279	-	intergenic	exon	NA	NA	2	m	ENST00000546444	NONCO1044	TSS10430	TCONS_00012831	r
chr1	94784035	94784463	429	-	intergenic	exon	NA	NA	1	m	ENST00000414039	NONCO1045	TSS10437	TCONS_00012836	r
chr1	94789963	94790125	163	-	intergenic	exon	NA	NA	2	m	ENST00000414039	NONCO1045	TSS10437	TCONS_00012836	r
chr1	95051112	95052318	1207	-	intergenic	exon	NA	NA	1	m	ENST00000413541	NONCO1046	TSS10442	TCONS_00012841	.
chr1	95056890	95057853	964	-	intergenic	exon	NA	NA	2	m	ENST00000413541	NONCO1046	TSS10442	TCONS_00012841	.
chr1	95086707	95087512	806	-	intergenic	exon	NA	NA	1	m	ENST00000435559	NONCO1047	TSS10443	TCONS_00012842	.
chr1	95088275	95089740	1466	-	intergenic	exon	NA	NA	2	m	ENST00000435559	NONCO1047	TSS10443	TCONS_00012842	.
chr1	95104017	95104114	98	-	antisense_upstream	exon	NA	NA	1	m	ENST00000442418	NONCO1048	TSS10446	TCONS_00012843	.
chr1	95144981	95145163	183	-	antisense_upstream	exon	NA	NA	2	m	ENST00000442418	NONCO1048	TSS10446	TCONS_00012843	.
chr1	95197814	95197993	180	-	antisense_upstream	exon	NA	NA	3	m	ENST00000442418	NONCO1048	TSS10446	TCONS_00012843	.
chr1	95207825	95207970	146	-	antisense_upstream	exon	NA	NA	4	m	ENST00000442418	NONCO1048	TSS10446	TCONS_00012843	.
chr1	95285512	95285652	141	-	antisense_upstream	exon	NA	NA	5	m	ENST00000442418	NONCO1048	TSS10446	TCONS_00012843	.
chr1	95123089	95123611	523	-	antisense_upstream	exon	NA	NA	1	m	ENST00000452922	NONCO1048	TSS10445	TCONS_00012845	r
chr1	95144981	95145163	183	-	antisense_upstream	exon	NA	NA	2	m	ENST00000452922	NONCO1048	TSS10445	TCONS_00012845	r
chr1	95170995	95171113	119	-	antisense_upstream	exon	NA	NA	3	m	ENST00000452922	NONCO1048	TSS10445	TCONS_00012845	r
chr1	95197814	95197993	180	-	antisense_upstream	exon	NA	NA	4	m	ENST00000452922	NONCO1048	TSS10445	TCONS_00012845	r
chr1	95285512	95285837	326	-	antisense_upstream	exon	NA	NA	5	m	ENST00000452922	NONCO1048	TSS10445	TCONS_00012845	r
chr1	95138453	95138827	375	-	antisense_upstream	exon	NA	NA	1	m	ENST00000432162	NONCO1048	TSS10448	TCONS_00012847	.
chr1	95144981	95145163	183	-	antisense_upstream	exon	NA	NA	2	m	ENST00000432162	NONCO1048	TSS10448	TCONS_00012847	.
chr1	95197814	95197901	88	-	antisense_upstream	exon	NA	NA	3	m	ENST00000432162	NONCO1048	TSS10448	TCONS_00012847	.
chr1	95138474	95138850	377	-	antisense_upstream	exon	NA	NA	1	m	ENST00000424505	NONCO1048	TSS10449	TCONS_00012848	.
chr1	95139483	95139717	235	-	antisense_upstream	exon	NA	NA	2	m	ENST00000424505	NONCO1048	TSS10449	TCONS_00012848	.
chr1	95138685	95138827	143	-	antisense_upstream	exon	NA	NA	1	m	ENST00000421997	NONCO1048	TSS10445	TCONS_00012849	.
chr1	95144981	95145163	183	-	antisense_upstream	exon	NA	NA	2	m	ENST00000421997	NONCO1048	TSS10445	TCONS_00012849	.
chr1	95170995	95171113	119	-	antisense_upstream	exon	NA	NA	3	m	ENST00000421997	NONCO1048	TSS10445	TCONS_00012849	.
chr1	95285512	95285775	264	-	antisense_upstream	exon	NA	NA	4	m	ENST00000421997	NONCO1048	TSS10445	TCONS_00012849	.
chr1	95145136	95145163	28	-	antisense_upstream	exon	NA	NA	1	m	ENST00000418366	NONCO1048	TSS10445	TCONS_00012851	.
chr1	95170995	95171113	119	-	antisense_upstream	exon	NA	NA	2	m	ENST00000418366	NONCO1048	TSS10445	TCONS_00012851	.
chr1	95197814	95197993	180	-	antisense_upstream	exon	NA	NA	3	m	ENST00000418366	NONCO1048	TSS10445	TCONS_00012851	.
chr1	95207825	95207970	146	-	antisense_upstream	exon	NA	NA	4	m	ENST00000418366	NONCO1048	TSS10445	TCONS_00012851	.
chr1	95209394	95209549	156	-	antisense_upstream	exon	NA	NA	5	m	ENST00000418366	NONCO1048	TSS10445	TCONS_00012851	.
chr1	95285512	95285775	264	-	antisense_upstream	exon	NA	NA	6	m	ENST00000418366	NONCO1048	TSS10445	TCONS_00012851	.
chr1	95197689	95197993	305	-	antisense_upstream	exon	NA	NA	1	m	ENST00000424711	NONCO1048	TSS10452	TCONS_00012852	.
chr1	95207825	95208051	227	-	antisense_upstream	exon	NA	NA	2	m	ENST00000424711	NONCO1048	TSS10452	TCONS_00012852	.
chr1	21742391	21742428	38	+	intergenic	exon	NA	NA	1	m	ENST00000444647	NONCO105	TSS1006	TCONS_00001163	.
chr1	21742819	21743112	294	+	intergenic	exon	NA	NA	2	m	ENST00000444647	NONCO105	TSS1006	TCONS_00001163	.
chr1	21743711	21743985	275	+	intergenic	exon	NA	NA	3	m	ENST00000444647	NONCO105	TSS1006	TCONS_00001163	.
chr1	21742815	21743112	298	+	intergenic	exon	NA	NA	1	m	ENST00000423921	NONCO105	TSS1007	TCONS_00001164	.
chr1	21743465	21743614	150	+	intergenic	exon	NA	NA	2	m	ENST00000423921	NONCO105	TSS1007	TCONS_00001164	.
chr1	21743711	21743867	157	+	intergenic	exon	NA	NA	3	m	ENST00000423921	NONCO105	TSS1007	TCONS_00001164	.
chr1	95776484	95776749	266	-	intergenic	exon	NA	NA	1	m	ENST00000423410	NONCO1052	TSS10470	TCONS_00012875	.
chr1	95783704	95783819	116	-	intergenic	exon	NA	NA	2	m	ENST00000423410	NONCO1052	TSS10470	TCONS_00012875	.
chr1	95816807	95817185	379	-	intergenic	exon	NA	NA	1	m	ENST00000438093	NONCO1053	TSS10471	TCONS_00012876	.
chr1	95817588	95817810	223	-	intergenic	exon	NA	NA	2	m	ENST00000438093	NONCO1053	TSS10471	TCONS_00012876	.
chr1	95821785	95822033	249	-	intergenic	exon	NA	NA	1	m	ENST00000426881	NONCO1054	TSS10472	TCONS_00012877	r
chr1	95826237	95826421	185	-	intergenic	exon	NA	NA	2	m	ENST00000426881	NONCO1054	TSS10472	TCONS_00012877	r
chr1	95846188	95846556	369	-	intergenic	exon	NA	NA	3	m	ENST00000426881	NONCO1054	TSS10472	TCONS_00012877	r
chr1	95821791	95822033	243	-	intergenic	exon	NA	NA	1	m	ENST00000427695	NONCO1054	TSS10472	TCONS_00012878	r
chr1	95826237	95826421	185	-	intergenic	exon	NA	NA	2	m	ENST00000427695	NONCO1054	TSS10472	TCONS_00012878	r
chr1	95838137	95838212	76	-	intergenic	exon	NA	NA	3	m	ENST00000427695	NONCO1054	TSS10472	TCONS_00012878	r
chr1	95846188	95846528	341	-	intergenic	exon	NA	NA	4	m	ENST00000427695	NONCO1054	TSS10472	TCONS_00012878	r
chr1	96719625	96721306	1682	-	intergenic	exon	NA	NA	1	m	ENST00000435311	NONCO1055	TSS10475	TCONS_00012880	r
chr1	96769040	96769120	81	-	intergenic	exon	NA	NA	2	m	ENST00000435311	NONCO1055	TSS10475	TCONS_00012880	r
chr1	96769829	96769894	66	-	intergenic	exon	NA	NA	3	m	ENST00000435311	NONCO1055	TSS10475	TCONS_00012880	r
chr1	96818710	96818788	79	-	intergenic	exon	NA	NA	4	m	ENST00000435311	NONCO1055	TSS10475	TCONS_00012880	r
chr1	96820782	96820823	42	-	intergenic	exon	NA	NA	5	m	ENST00000435311	NONCO1055	TSS10475	TCONS_00012880	r
chr1	96839638	96839681	44	-	intergenic	exon	NA	NA	6	m	ENST00000435311	NONCO1055	TSS10475	TCONS_00012880	r
chr1	98399030	98399725	696	-	intergenic	exon	NA	NA	1	m	ENST00000602672	NONCO1057	TSS10482	TCONS_00012890	.
chr1	98407129	98407302	174	-	intergenic	exon	NA	NA	2	m	ENST00000602672	NONCO1057	TSS10482	TCONS_00012890	.
chr1	98453556	98455125	1570	-	intergenic	exon	NA	NA	1	m	ENST00000424528	NONCO1058	TSS10486	TCONS_00012892	.
chr1	98460472	98460556	85	-	intergenic	exon	NA	NA	2	m	ENST00000424528	NONCO1058	TSS10486	TCONS_00012892	.
chr1	98511564	98511952	389	-	intergenic	exon	NA	NA	3	m	ENST00000424528	NONCO1058	TSS10486	TCONS_00012892	.
chr1	98512075	98512183	109	-	intergenic	exon	NA	NA	4	m	ENST00000424528	NONCO1058	TSS10486	TCONS_00012892	.
chr1	98514934	98515419	486	-	intergenic	exon	NA	NA	5	m	ENST00000424528	NONCO1058	TSS10486	TCONS_00012892	.
chr1	98510057	98510810	754	-	intergenic	exon	NA	NA	1	m	ENST00000602984	NONCO1058	TSS10488	TCONS_00012895	.
chr1	98511564	98511777	214	-	intergenic	exon	NA	NA	2	m	ENST00000602984	NONCO1058	TSS10488	TCONS_00012895	.
chr1	99937971	99938205	235	-	intergenic	exon	NA	NA	1	m	ENST00000438829	NONCO1059	TSS10491	TCONS_00012899	.
chr1	99945670	99945793	124	-	intergenic	exon	NA	NA	2	m	ENST00000438829	NONCO1059	TSS10491	TCONS_00012899	.
chr1	99953301	99953360	60	-	intergenic	exon	NA	NA	3	m	ENST00000438829	NONCO1059	TSS10491	TCONS_00012899	.
chr1	99999549	99999571	23	-	intergenic	exon	NA	NA	4	m	ENST00000438829	NONCO1059	TSS10491	TCONS_00012899	.
chr1	21912965	21913582	618	+	intergenic	exon	NA	NA	1	m	ENST00000457706	NONCO106	TSS1023	TCONS_00001190	.
chr1	21917478	21917680	203	+	intergenic	exon	NA	NA	2	m	ENST00000457706	NONCO106	TSS1023	TCONS_00001190	.
chr1	100729565	100729587	23	-	antisense_upstream	exon	NA	NA	1	m	ENST00000421185	NONCO1063	TSS10504	TCONS_00012916	.
chr1	100730624	100730803	180	-	antisense_upstream	exon	NA	NA	2	m	ENST00000421185	NONCO1063	TSS10504	TCONS_00012916	.
chr1	100731371	100731473	103	-	antisense_upstream	exon	NA	NA	3	m	ENST00000421185	NONCO1063	TSS10504	TCONS_00012916	.
chr1	100731560	100731676	117	-	antisense_upstream	exon	NA	NA	4	m	ENST00000421185	NONCO1063	TSS10504	TCONS_00012916	.
chr1	101092605	101092858	254	-	intergenic	exon	NA	NA	1	m	ENST00000416343	NONCO1066	TSS10511	TCONS_00012925	.
chr1	101094381	101094498	118	-	intergenic	exon	NA	NA	2	m	ENST00000416343	NONCO1066	TSS10511	TCONS_00012925	.
chr1	101106045	101106169	125	-	intergenic	exon	NA	NA	3	m	ENST00000416343	NONCO1066	TSS10511	TCONS_00012925	.
chr1	101701239	101701437	199	-	antisense_upstream	exon	NA	NA	1	m	ENST00000432195	NONCO1067	TSS10521	TCONS_00012949	.
chr1	101701881	101702084	204	-	antisense_upstream	exon	NA	NA	2	m	ENST00000432195	NONCO1067	TSS10521	TCONS_00012949	.
chr1	102665295	102665553	259	-	intergenic	exon	NA	NA	1	m	ENST00000447916	NONCO1068	TSS10531	TCONS_00012959	r
chr1	102775826	102775884	59	-	intergenic	exon	NA	NA	2	m	ENST00000447916	NONCO1068	TSS10531	TCONS_00012959	r
chr1	102852761	102852807	47	-	intergenic	exon	NA	NA	3	m	ENST00000447916	NONCO1068	TSS10531	TCONS_00012959	r
chr1	102852918	102852977	60	-	intergenic	exon	NA	NA	4	m	ENST00000447916	NONCO1068	TSS10531	TCONS_00012959	r
chr1	102854091	102854185	95	-	intergenic	exon	NA	NA	5	m	ENST00000447916	NONCO1068	TSS10531	TCONS_00012959	r
chr1	102855050	102855186	137	-	intergenic	exon	NA	NA	6	m	ENST00000447916	NONCO1068	TSS10531	TCONS_00012959	r
chr1	103228878	103229061	184	-	intergenic	exon	NA	NA	1	m	ENST00000414418	NONCO1069	TSS10532	TCONS_00012960	r
chr1	103232113	103232212	100	-	intergenic	exon	NA	NA	2	m	ENST00000414418	NONCO1069	TSS10532	TCONS_00012960	r
chr1	103233079	103233186	108	-	intergenic	exon	NA	NA	3	m	ENST00000414418	NONCO1069	TSS10532	TCONS_00012960	r
chr1	103233331	103233358	28	-	intergenic	exon	NA	NA	4	m	ENST00000414418	NONCO1069	TSS10532	TCONS_00012960	r
chr1	103238514	103238648	135	-	intergenic	exon	NA	NA	5	m	ENST00000414418	NONCO1069	TSS10532	TCONS_00012960	r
chr1	103265360	103265484	125	-	intergenic	exon	NA	NA	6	m	ENST00000414418	NONCO1069	TSS10532	TCONS_00012960	r
chr1	103319148	103319398	251	-	intergenic	exon	NA	NA	7	m	ENST00000414418	NONCO1069	TSS10532	TCONS_00012960	r
chr1	22351681	22351865	185	+	intergenic	exon	NA	NA	1	m	ENST00000434233	NONCO107	TSS1036	TCONS_00001205	.
chr1	22356773	22357396	624	+	intergenic	exon	NA	NA	2	m	ENST00000434233	NONCO107	TSS1036	TCONS_00001205	.
chr1	22352004	22352132	129	+	intergenic	exon	NA	NA	1	m	ENST00000420503	NONCO107	TSS1037	TCONS_00001206	.
chr1	22353907	22354027	121	+	intergenic	exon	NA	NA	2	m	ENST00000420503	NONCO107	TSS1037	TCONS_00001206	.
chr1	22356773	22357293	521	+	intergenic	exon	NA	NA	3	m	ENST00000420503	NONCO107	TSS1037	TCONS_00001206	.
chr1	22352027	22352136	110	+	intergenic	exon	NA	NA	1	m	ENST00000416769	NONCO107	TSS1037	TCONS_00001207	.
chr1	22356773	22357716	944	+	intergenic	exon	NA	NA	2	m	ENST00000416769	NONCO107	TSS1037	TCONS_00001207	.
chr1	22354832	22354872	41	+	intergenic	exon	NA	NA	1	m	ENST00000452322	NONCO107	TSS1038	TCONS_00001208	.
chr1	22356773	22357105	333	+	intergenic	exon	NA	NA	2	m	ENST00000452322	NONCO107	TSS1038	TCONS_00001208	.
chr1	103820969	103821114	146	-	intergenic	exon	NA	NA	1	m	ENST00000455771	NONCO1070	TSS10540	TCONS_00012972	.
chr1	103832177	103832263	87	-	intergenic	exon	NA	NA	2	m	ENST00000455771	NONCO1070	TSS10540	TCONS_00012972	.
chr1	103835781	103835986	206	-	intergenic	exon	NA	NA	3	m	ENST00000455771	NONCO1070	TSS10540	TCONS_00012972	.
chr1	103821644	103821705	62	-	intergenic	exon	NA	NA	1	m	ENST00000451705	NONCO1070	TSS10540	TCONS_00012973	.
chr1	103832177	103832263	87	-	intergenic	exon	NA	NA	2	m	ENST00000451705	NONCO1070	TSS10540	TCONS_00012973	.
chr1	103835781	103835986	206	-	intergenic	exon	NA	NA	3	m	ENST00000451705	NONCO1070	TSS10540	TCONS_00012973	.
chr1	103960701	103960846	146	-	antisense_upstream	exon	NA	NA	1	m	ENST00000444810	NONCO1071	TSS10541	TCONS_00012974	.
chr1	103971909	103971995	87	-	antisense_upstream	exon	NA	NA	2	m	ENST00000444810	NONCO1071	TSS10541	TCONS_00012974	.
chr1	103975513	103975718	206	-	antisense_upstream	exon	NA	NA	3	m	ENST00000444810	NONCO1071	TSS10541	TCONS_00012974	.
chr1	104068018	104068105	88	-	antisense_upstream	exon	NA	NA	4	m	ENST00000444810	NONCO1071	TSS10541	TCONS_00012974	.
chr1	103961376	103961437	62	-	antisense_upstream	exon	NA	NA	1	m	ENST00000447322	NONCO1071	TSS10541	TCONS_00012975	.
chr1	103971909	103971995	87	-	antisense_upstream	exon	NA	NA	2	m	ENST00000447322	NONCO1071	TSS10541	TCONS_00012975	.
chr1	103975513	103975718	206	-	antisense_upstream	exon	NA	NA	3	m	ENST00000447322	NONCO1071	TSS10541	TCONS_00012975	.
chr1	104011964	104012012	49	-	antisense_upstream	exon	NA	NA	4	m	ENST00000447322	NONCO1071	TSS10541	TCONS_00012975	.
chr1	104068018	104068083	66	-	antisense_upstream	exon	NA	NA	5	m	ENST00000447322	NONCO1071	TSS10541	TCONS_00012975	.
chr1	106130197	106130470	274	-	intergenic	exon	NA	NA	1	m	ENST00000600656	NONCO1074	TSS10551	TCONS_00012986	.
chr1	106132302	106132407	106	-	intergenic	exon	NA	NA	2	m	ENST00000600656	NONCO1074	TSS10551	TCONS_00012986	.
chr1	106146785	106146887	103	-	intergenic	exon	NA	NA	3	m	ENST00000600656	NONCO1074	TSS10551	TCONS_00012986	.
chr1	106148557	106148629	73	-	intergenic	exon	NA	NA	4	m	ENST00000600656	NONCO1074	TSS10551	TCONS_00012986	.
chr1	106130202	106130470	269	-	intergenic	exon	NA	NA	1	m	ENST00000597635	NONCO1074	TSS10551	TCONS_00012987	.
chr1	106132302	106132407	106	-	intergenic	exon	NA	NA	2	m	ENST00000597635	NONCO1074	TSS10551	TCONS_00012987	.
chr1	106143253	106143381	129	-	intergenic	exon	NA	NA	3	m	ENST00000597635	NONCO1074	TSS10551	TCONS_00012987	.
chr1	106146785	106146887	103	-	intergenic	exon	NA	NA	4	m	ENST00000597635	NONCO1074	TSS10551	TCONS_00012987	.
chr1	106148557	106148629	73	-	intergenic	exon	NA	NA	5	m	ENST00000597635	NONCO1074	TSS10551	TCONS_00012987	.
chr1	106132300	106132407	108	-	intergenic	exon	NA	NA	1	m	ENST00000595309	NONCO1074	TSS10551	TCONS_00012988	r
chr1	106145899	106146180	282	-	intergenic	exon	NA	NA	2	m	ENST00000595309	NONCO1074	TSS10551	TCONS_00012988	r
chr1	106146785	106146887	103	-	intergenic	exon	NA	NA	3	m	ENST00000595309	NONCO1074	TSS10551	TCONS_00012988	r
chr1	106148557	106148629	73	-	intergenic	exon	NA	NA	4	m	ENST00000595309	NONCO1074	TSS10551	TCONS_00012988	r
chr1	106132316	106132407	92	-	intergenic	exon	NA	NA	1	m	ENST00000420901	NONCO1074	TSS10552	TCONS_00012989	.
chr1	106146785	106146887	103	-	intergenic	exon	NA	NA	2	m	ENST00000420901	NONCO1074	TSS10552	TCONS_00012989	.
chr1	106148557	106148711	155	-	intergenic	exon	NA	NA	3	m	ENST00000420901	NONCO1074	TSS10552	TCONS_00012989	.
chr1	106161481	106161540	60	-	intergenic	exon	NA	NA	4	m	ENST00000420901	NONCO1074	TSS10552	TCONS_00012989	.
chr1	106132319	106132407	89	-	intergenic	exon	NA	NA	1	m	ENST00000597752	NONCO1074	TSS10551	TCONS_00012990	r
chr1	106143892	106144007	116	-	intergenic	exon	NA	NA	2	m	ENST00000597752	NONCO1074	TSS10551	TCONS_00012990	r
chr1	106145899	106146180	282	-	intergenic	exon	NA	NA	3	m	ENST00000597752	NONCO1074	TSS10551	TCONS_00012990	r
chr1	106146785	106146887	103	-	intergenic	exon	NA	NA	4	m	ENST00000597752	NONCO1074	TSS10551	TCONS_00012990	r
chr1	106148557	106148629	73	-	intergenic	exon	NA	NA	5	m	ENST00000597752	NONCO1074	TSS10551	TCONS_00012990	r
chr1	106143114	106143381	268	-	intergenic	exon	NA	NA	1	m	ENST00000594455	NONCO1074	TSS10551	TCONS_00012991	.
chr1	106146785	106146887	103	-	intergenic	exon	NA	NA	2	m	ENST00000594455	NONCO1074	TSS10551	TCONS_00012991	.
chr1	106148557	106148629	73	-	intergenic	exon	NA	NA	3	m	ENST00000594455	NONCO1074	TSS10551	TCONS_00012991	.
chr1	106144774	106146180	1407	-	intergenic	exon	NA	NA	1	m	ENST00000435253	NONCO1074	TSS10552	TCONS_00012992	.
chr1	106146785	106146887	103	-	intergenic	exon	NA	NA	2	m	ENST00000435253	NONCO1074	TSS10552	TCONS_00012992	.
chr1	106148557	106148711	155	-	intergenic	exon	NA	NA	3	m	ENST00000435253	NONCO1074	TSS10552	TCONS_00012992	.
chr1	106161397	106161580	184	-	intergenic	exon	NA	NA	4	m	ENST00000435253	NONCO1074	TSS10552	TCONS_00012992	.
chr1	106148599	106148711	113	-	intergenic	exon	NA	NA	1	m	ENST00000610126	NONCO1074	TSS10552	TCONS_00012993	r
chr1	106155522	106155566	45	-	intergenic	exon	NA	NA	2	m	ENST00000610126	NONCO1074	TSS10552	TCONS_00012993	r
chr1	106161481	106161557	77	-	intergenic	exon	NA	NA	3	m	ENST00000610126	NONCO1074	TSS10552	TCONS_00012993	r
chr1	106470246	106470336	91	-	intergenic	exon	NA	NA	1	m	ENST00000446693	NONCO1075	TSS10554	TCONS_00012995	r
chr1	106494830	106494901	72	-	intergenic	exon	NA	NA	2	m	ENST00000446693	NONCO1075	TSS10554	TCONS_00012995	r
chr1	106495126	106495516	391	-	intergenic	exon	NA	NA	3	m	ENST00000446693	NONCO1075	TSS10554	TCONS_00012995	r
chr1	106470246	106470336	91	-	intergenic	exon	NA	NA	1	m	ENST00000429080	NONCO1075	TSS10555	TCONS_00012996	r
chr1	106531072	106531129	58	-	intergenic	exon	NA	NA	2	m	ENST00000429080	NONCO1075	TSS10555	TCONS_00012996	r
chr1	106534788	106534966	179	-	intergenic	exon	NA	NA	3	m	ENST00000429080	NONCO1075	TSS10555	TCONS_00012996	r
chr1	106565704	106565834	131	-	intergenic	exon	NA	NA	4	m	ENST00000429080	NONCO1075	TSS10555	TCONS_00012996	r
chr1	106470247	106470336	90	-	intergenic	exon	NA	NA	1	m	ENST00000417385	NONCO1075	TSS10556	TCONS_00012997	r
chr1	106494830	106494901	72	-	intergenic	exon	NA	NA	2	m	ENST00000417385	NONCO1075	TSS10556	TCONS_00012997	r
chr1	106495126	106495222	97	-	intergenic	exon	NA	NA	3	m	ENST00000417385	NONCO1075	TSS10556	TCONS_00012997	r
chr1	106495994	106496111	118	-	intergenic	exon	NA	NA	4	m	ENST00000417385	NONCO1075	TSS10556	TCONS_00012997	r
chr1	108803818	108805412	1595	-	intergenic	exon	NA	NA	1	m	ENST00000438965	NONCO1078	TSS10597	TCONS_00013025	r
chr1	108815426	108816311	886	-	intergenic	exon	NA	NA	2	m	ENST00000438965	NONCO1078	TSS10597	TCONS_00013025	r
chr1	110426798	110427207	410	-	intergenic	exon	NA	NA	1	m	ENST00000415166	NONCO1086	TSS10678	TCONS_00013136	.
chr1	110428847	110428886	40	-	intergenic	exon	NA	NA	2	m	ENST00000415166	NONCO1086	TSS10678	TCONS_00013136	.
chr1	110751456	110751826	371	-	antisense_upstream	exon	NA	NA	1	m	ENST00000455967	NONCO1089	TSS10689	TCONS_00013142	.
chr1	110752233	110752609	377	-	antisense_upstream	exon	NA	NA	2	m	ENST00000455967	NONCO1089	TSS10689	TCONS_00013142	.
chr1	111030302	111032529	2228	-	intergenic	exon	NA	NA	1	m	ENST00000457402	NONCO1093	TSS10698	TCONS_00013159	.
chr1	111032758	111032880	123	-	intergenic	exon	NA	NA	2	m	ENST00000457402	NONCO1093	TSS10698	TCONS_00013159	.
chr1	111550322	111550735	414	-	intergenic	exon	NA	NA	1	m	ENST00000423082	NONCO1094	TSS10712	TCONS_00013175	.
chr1	111557099	111557751	653	-	intergenic	exon	NA	NA	2	m	ENST00000423082	NONCO1094	TSS10712	TCONS_00013175	.
chr1	111557905	111558152	248	-	intergenic	exon	NA	NA	3	m	ENST00000423082	NONCO1094	TSS10712	TCONS_00013175	.
chr1	111895897	111896001	105	-	antisense_downstream	exon	NA	NA	1	m	ENST00000423668	NONCO1096	TSS10730	TCONS_00013199	.
chr1	111900096	111900240	145	-	antisense_downstream	exon	NA	NA	2	m	ENST00000423668	NONCO1096	TSS10730	TCONS_00013199	.
chr1	111901350	111901443	94	-	antisense_downstream	exon	NA	NA	3	m	ENST00000423668	NONCO1096	TSS10730	TCONS_00013199	.
chr1	111902225	111902303	79	-	antisense_downstream	exon	NA	NA	4	m	ENST00000423668	NONCO1096	TSS10730	TCONS_00013199	.
chr1	111903440	111903566	127	-	antisense_downstream	exon	NA	NA	5	m	ENST00000423668	NONCO1096	TSS10730	TCONS_00013199	.
chr1	111906130	111906254	125	-	antisense_downstream	exon	NA	NA	6	m	ENST00000423668	NONCO1096	TSS10730	TCONS_00013199	.
chr1	111907713	111907865	153	-	antisense_downstream	exon	NA	NA	7	m	ENST00000423668	NONCO1096	TSS10730	TCONS_00013199	.
chr1	111909364	111909419	56	-	antisense_downstream	exon	NA	NA	8	m	ENST00000423668	NONCO1096	TSS10730	TCONS_00013199	.
chr1	111909783	111910031	249	-	antisense_downstream	exon	NA	NA	9	m	ENST00000423668	NONCO1096	TSS10730	TCONS_00013199	.
chr1	762988	763155	168	+	intergenic	exon	NA	NA	1	m	ENST00000445118	NONCO11	TSS56	TCONS_00000066	.
chr1	764383	764484	102	+	intergenic	exon	NA	NA	2	m	ENST00000445118	NONCO11	TSS56	TCONS_00000066	.
chr1	787307	787490	184	+	intergenic	exon	NA	NA	3	m	ENST00000445118	NONCO11	TSS56	TCONS_00000066	.
chr1	788051	788146	96	+	intergenic	exon	NA	NA	4	m	ENST00000445118	NONCO11	TSS56	TCONS_00000066	.
chr1	788771	794826	6056	+	intergenic	exon	NA	NA	5	m	ENST00000445118	NONCO11	TSS56	TCONS_00000066	.
chr1	762988	763155	168	+	intergenic	exon	NA	NA	1	m	Human-Hermes-R1.tophat.137.1	NONCO11	TSS56	TCONS_00000067	.
chr1	764383	764484	102	+	intergenic	exon	NA	NA	2	m	Human-Hermes-R1.tophat.137.1	NONCO11	TSS56	TCONS_00000067	.
chr1	783034	783186	153	+	intergenic	exon	NA	NA	3	m	Human-Hermes-R1.tophat.137.1	NONCO11	TSS56	TCONS_00000067	.
chr1	787307	787490	184	+	intergenic	exon	NA	NA	4	m	Human-Hermes-R1.tophat.137.1	NONCO11	TSS56	TCONS_00000067	.
chr1	788051	788146	96	+	intergenic	exon	NA	NA	5	m	Human-Hermes-R1.tophat.137.1	NONCO11	TSS56	TCONS_00000067	.
chr1	788771	794826	6056	+	intergenic	exon	NA	NA	6	m	Human-Hermes-R1.tophat.137.1	NONCO11	TSS56	TCONS_00000067	.
chr1	763041	763155	115	+	intergenic	exon	NA	NA	1	m	ENST00000610067	NONCO11	TSS56	TCONS_00000068	.
chr1	764383	764484	102	+	intergenic	exon	NA	NA	2	m	ENST00000610067	NONCO11	TSS56	TCONS_00000068	.
chr1	783034	783186	153	+	intergenic	exon	NA	NA	3	m	ENST00000610067	NONCO11	TSS56	TCONS_00000068	.
chr1	784864	784982	119	+	intergenic	exon	NA	NA	4	m	ENST00000610067	NONCO11	TSS56	TCONS_00000068	.
chr1	787307	787367	61	+	intergenic	exon	NA	NA	5	m	ENST00000610067	NONCO11	TSS56	TCONS_00000068	.
chr1	763047	763155	109	+	intergenic	exon	NA	NA	1	m	ENST00000441765	NONCO11	TSS56	TCONS_00000069	.
chr1	764383	764484	102	+	intergenic	exon	NA	NA	2	m	ENST00000441765	NONCO11	TSS56	TCONS_00000069	.
chr1	776580	777118	539	+	intergenic	exon	NA	NA	3	m	ENST00000441765	NONCO11	TSS56	TCONS_00000069	.
chr1	763049	763155	107	+	intergenic	exon	NA	NA	1	m	ENST00000609139	NONCO11	TSS56	TCONS_00000070	.
chr1	764383	764484	102	+	intergenic	exon	NA	NA	2	m	ENST00000609139	NONCO11	TSS56	TCONS_00000070	.
chr1	776580	776753	174	+	intergenic	exon	NA	NA	3	m	ENST00000609139	NONCO11	TSS56	TCONS_00000070	.
chr1	787307	787378	72	+	intergenic	exon	NA	NA	4	m	ENST00000609139	NONCO11	TSS56	TCONS_00000070	.
chr1	764443	764484	42	+	intergenic	exon	NA	NA	1	m	ENST00000608189	NONCO11	TSS57	TCONS_00000071	.
chr1	783034	783186	153	+	intergenic	exon	NA	NA	2	m	ENST00000608189	NONCO11	TSS57	TCONS_00000071	.
chr1	784864	784982	119	+	intergenic	exon	NA	NA	3	m	ENST00000608189	NONCO11	TSS57	TCONS_00000071	.
chr1	785561	785731	171	+	intergenic	exon	NA	NA	4	m	ENST00000608189	NONCO11	TSS57	TCONS_00000071	.
chr1	764443	764484	42	+	intergenic	exon	NA	NA	1	m	ENST00000609009	NONCO11	TSS57	TCONS_00000072	.
chr1	783034	783186	153	+	intergenic	exon	NA	NA	2	m	ENST00000609009	NONCO11	TSS57	TCONS_00000072	.
chr1	784864	784982	119	+	intergenic	exon	NA	NA	3	m	ENST00000609009	NONCO11	TSS57	TCONS_00000072	.
chr1	785558	785731	174	+	intergenic	exon	NA	NA	4	m	ENST00000609009	NONCO11	TSS57	TCONS_00000072	.
chr1	766985	767057	73	+	intergenic	exon	NA	NA	1	m	ENST00000415295	NONCO11	TSS58	TCONS_00000073	.
chr1	776580	777400	821	+	intergenic	exon	NA	NA	2	m	ENST00000415295	NONCO11	TSS58	TCONS_00000073	.
chr1	786728	787490	763	+	intergenic	exon	NA	NA	1	m	ENST00000425657	NONCO11	TSS59	TCONS_00000074	.
chr1	788051	788132	82	+	intergenic	exon	NA	NA	2	m	ENST00000425657	NONCO11	TSS59	TCONS_00000074	.
chr1	112719856	112720235	380	-	intergenic	exon	NA	NA	1	m	ENST00000427290	NONCO1100	TSS10761	TCONS_00013236	.
chr1	112902984	112903150	167	-	intergenic	exon	NA	NA	2	m	ENST00000427290	NONCO1100	TSS10761	TCONS_00013236	.
chr1	113362792	113363160	369	-	intergenic	exon	NA	NA	1	m	ENST00000433505	NONCO1102	TSS10785	TCONS_00013296	r
chr1	113366275	113366376	102	-	intergenic	exon	NA	NA	2	m	ENST00000433505	NONCO1102	TSS10785	TCONS_00013296	r
chr1	113368135	113368294	160	-	intergenic	exon	NA	NA	3	m	ENST00000433505	NONCO1102	TSS10785	TCONS_00013296	r
chr1	113392302	113392437	136	-	intergenic	exon	NA	NA	4	m	ENST00000433505	NONCO1102	TSS10785	TCONS_00013296	r
chr1	113362796	113363163	368	-	intergenic	exon	NA	NA	1	m	ENST00000401018	NONCO1102	TSS10786	TCONS_00013297	r
chr1	113366275	113366376	102	-	intergenic	exon	NA	NA	2	m	ENST00000401018	NONCO1102	TSS10786	TCONS_00013297	r
chr1	113368135	113368294	160	-	intergenic	exon	NA	NA	3	m	ENST00000401018	NONCO1102	TSS10786	TCONS_00013297	r
chr1	113371099	113371133	35	-	intergenic	exon	NA	NA	4	m	ENST00000401018	NONCO1102	TSS10786	TCONS_00013297	r
chr1	113383110	113383202	93	-	intergenic	exon	NA	NA	5	m	ENST00000401018	NONCO1102	TSS10786	TCONS_00013297	r
chr1	113391576	113391672	97	-	intergenic	exon	NA	NA	6	m	ENST00000401018	NONCO1102	TSS10786	TCONS_00013297	r
chr1	113392302	113393265	964	-	intergenic	exon	NA	NA	7	m	ENST00000401018	NONCO1102	TSS10786	TCONS_00013297	r
chr1	113362912	113363160	249	-	intergenic	exon	NA	NA	1	m	ENST00000449572	NONCO1102	TSS10785	TCONS_00013298	r
chr1	113366275	113366376	102	-	intergenic	exon	NA	NA	2	m	ENST00000449572	NONCO1102	TSS10785	TCONS_00013298	r
chr1	113368135	113368294	160	-	intergenic	exon	NA	NA	3	m	ENST00000449572	NONCO1102	TSS10785	TCONS_00013298	r
chr1	113383110	113383202	93	-	intergenic	exon	NA	NA	4	m	ENST00000449572	NONCO1102	TSS10785	TCONS_00013298	r
chr1	113392302	113392399	98	-	intergenic	exon	NA	NA	5	m	ENST00000449572	NONCO1102	TSS10785	TCONS_00013298	r
chr1	113554309	113556461	2153	-	antisense_upstream	exon	NA	NA	1	m	ENST00000421157	NONCO1103	TSS10794	TCONS_00013307	.
chr1	113591045	113591183	139	-	antisense_upstream	exon	NA	NA	2	m	ENST00000421157	NONCO1103	TSS10794	TCONS_00013307	.
chr1	113615561	113615727	167	-	antisense_upstream	exon	NA	NA	3	m	ENST00000421157	NONCO1103	TSS10794	TCONS_00013307	.
chr1	114544055	114544498	444	-	intergenic	exon	NA	NA	1	m	ENST00000604433	NONCO1105	TSS10835	TCONS_00013365	.
chr1	114544737	114544857	121	-	intergenic	exon	NA	NA	2	m	ENST00000604433	NONCO1105	TSS10835	TCONS_00013365	.
chr1	114749049	114749307	259	-	intergenic	exon	NA	NA	1	m	ENST00000420156	NONCO1106	TSS10839	TCONS_00013374	r
chr1	114804828	114804900	73	-	intergenic	exon	NA	NA	2	m	ENST00000420156	NONCO1106	TSS10839	TCONS_00013374	r
chr1	116966346	116966537	192	-	intergenic	exon	NA	NA	1	m	ENST00000423907	NONCO1111	TSS10886	TCONS_00013445	.
chr1	116971004	116971116	113	-	intergenic	exon	NA	NA	2	m	ENST00000423907	NONCO1111	TSS10886	TCONS_00013445	.
chr1	117020674	117020794	121	-	intergenic	exon	NA	NA	3	m	ENST00000423907	NONCO1111	TSS10886	TCONS_00013445	.
chr1	117021403	117021430	28	-	intergenic	exon	NA	NA	4	m	ENST00000423907	NONCO1111	TSS10886	TCONS_00013445	.
chr1	116995268	116995554	287	-	intergenic	exon	NA	NA	1	m	ENST00000443219	NONCO1111	TSS10886	TCONS_00013447	.
chr1	116997687	116997837	151	-	intergenic	exon	NA	NA	2	m	ENST00000443219	NONCO1111	TSS10886	TCONS_00013447	.
chr1	117020674	117020794	121	-	intergenic	exon	NA	NA	3	m	ENST00000443219	NONCO1111	TSS10886	TCONS_00013447	.
chr1	117021403	117021464	62	-	intergenic	exon	NA	NA	4	m	ENST00000443219	NONCO1111	TSS10886	TCONS_00013447	.
chr1	116995656	116995790	135	-	intergenic	exon	NA	NA	1	m	ENST00000437308	NONCO1111	TSS10887	TCONS_00013448	.
chr1	116997687	116997837	151	-	intergenic	exon	NA	NA	2	m	ENST00000437308	NONCO1111	TSS10887	TCONS_00013448	.
chr1	117008812	117009064	253	-	intergenic	exon	NA	NA	3	m	ENST00000437308	NONCO1111	TSS10887	TCONS_00013448	.
chr1	116995657	116995790	134	-	intergenic	exon	NA	NA	1	m	ENST00000430316	NONCO1111	TSS10889	TCONS_00013449	.
chr1	116997687	116997837	151	-	intergenic	exon	NA	NA	2	m	ENST00000430316	NONCO1111	TSS10889	TCONS_00013449	.
chr1	117020674	117020849	176	-	intergenic	exon	NA	NA	3	m	ENST00000430316	NONCO1111	TSS10889	TCONS_00013449	.
chr1	116995657	116995790	134	-	intergenic	exon	NA	NA	1	m	ENST00000434879	NONCO1111	TSS10886	TCONS_00013450	.
chr1	116997687	116997837	151	-	intergenic	exon	NA	NA	2	m	ENST00000434879	NONCO1111	TSS10886	TCONS_00013450	.
chr1	117016856	117016960	105	-	intergenic	exon	NA	NA	3	m	ENST00000434879	NONCO1111	TSS10886	TCONS_00013450	.
chr1	117021403	117021448	46	-	intergenic	exon	NA	NA	4	m	ENST00000434879	NONCO1111	TSS10886	TCONS_00013450	.
chr1	117006343	117006559	217	-	intergenic	exon	NA	NA	1	m	ENST00000430107	NONCO1111	TSS10887	TCONS_00013451	.
chr1	117008812	117009074	263	-	intergenic	exon	NA	NA	2	m	ENST00000430107	NONCO1111	TSS10887	TCONS_00013451	.
chr1	116971671	116971902	232	-	intergenic	exon	NA	NA	1	m	ENST00000449303	NONCO1112	TSS10891	TCONS_00013446	.
chr1	116975708	116975990	283	-	intergenic	exon	NA	NA	2	m	ENST00000449303	NONCO1112	TSS10891	TCONS_00013446	.
chr1	117035645	117037528	1884	-	intergenic	exon	NA	NA	1	m	ENST00000456414	NONCO1113	TSS10893	TCONS_00013452	.
chr1	117041424	117041834	411	-	intergenic	exon	NA	NA	2	m	ENST00000456414	NONCO1113	TSS10893	TCONS_00013452	.
chr1	118139454	118139616	163	-	antisense_upstream	exon	NA	NA	1	m	ENST00000440801	NONCO1116	TSS10918	TCONS_00013484	.
chr1	118147411	118147558	148	-	antisense_upstream	exon	NA	NA	2	m	ENST00000440801	NONCO1116	TSS10918	TCONS_00013484	.
chr1	118148268	118148333	66	-	antisense_upstream	exon	NA	NA	3	m	ENST00000440801	NONCO1116	TSS10918	TCONS_00013484	.
chr1	118146621	118147021	401	-	antisense_upstream	exon	NA	NA	1	m	ENST00000425010	NONCO1116	TSS10918	TCONS_00013485	r
chr1	118147411	118147558	148	-	antisense_upstream	exon	NA	NA	2	m	ENST00000425010	NONCO1116	TSS10918	TCONS_00013485	r
chr1	118148179	118148392	214	-	antisense_upstream	exon	NA	NA	3	m	ENST00000425010	NONCO1116	TSS10918	TCONS_00013485	r
chr1	118147246	118147558	313	-	antisense_upstream	exon	NA	NA	1	m	ENST00000456126	NONCO1116	TSS10918	TCONS_00013486	.
chr1	118148179	118148307	129	-	antisense_upstream	exon	NA	NA	2	m	ENST00000456126	NONCO1116	TSS10918	TCONS_00013486	.
chr1	119542967	119543516	550	-	intergenic	exon	NA	NA	1	m	ENST00000439394	NONCO1117	TSS10945	TCONS_00013514	.
chr1	119543913	119544015	103	-	intergenic	exon	NA	NA	2	m	ENST00000439394	NONCO1117	TSS10945	TCONS_00013514	.
chr1	119543241	119543513	273	-	intergenic	exon	NA	NA	1	m	ENST00000449439	NONCO1117	TSS10945	TCONS_00013515	.
chr1	119543892	119544028	137	-	intergenic	exon	NA	NA	2	m	ENST00000449439	NONCO1117	TSS10945	TCONS_00013515	.
chr1	119802888	119803302	415	-	intergenic	exon	NA	NA	1	m	ENST00000457719	NONCO1118	TSS10952	TCONS_00013525	.
chr1	119836649	119836790	142	-	intergenic	exon	NA	NA	2	m	ENST00000457719	NONCO1118	TSS10952	TCONS_00013525	.
chr1	119869586	119869926	341	-	intergenic	exon	NA	NA	3	m	ENST00000457719	NONCO1118	TSS10952	TCONS_00013525	.
chr1	120835810	120836418	609	-	antisense_upstream	exon	NA	NA	1	m	ENST00000412759	NONCO1119	TSS10980	TCONS_00013557	.
chr1	120838199	120838343	145	-	antisense_upstream	exon	NA	NA	2	m	ENST00000412759	NONCO1119	TSS10980	TCONS_00013557	.
chr1	23996784	23996836	53	+	intergenic	exon	NA	NA	1	m	ENST00000451300	NONCO112	TSS1091	TCONS_00001270	.
chr1	23997185	23997303	119	+	intergenic	exon	NA	NA	2	m	ENST00000451300	NONCO112	TSS1091	TCONS_00001270	.
chr1	23997401	23997702	302	+	intergenic	exon	NA	NA	3	m	ENST00000451300	NONCO112	TSS1091	TCONS_00001270	.
chr1	24002772	24002968	197	+	intergenic	exon	NA	NA	4	m	ENST00000451300	NONCO112	TSS1091	TCONS_00001270	.
chr1	24003008	24003233	226	+	intergenic	exon	NA	NA	5	m	ENST00000451300	NONCO112	TSS1091	TCONS_00001270	.
chr1	24004164	24004398	235	+	intergenic	exon	NA	NA	6	m	ENST00000451300	NONCO112	TSS1091	TCONS_00001270	.
chr1	24006696	24006749	54	+	intergenic	exon	NA	NA	7	m	ENST00000451300	NONCO112	TSS1091	TCONS_00001270	.
chr1	120876495	120876671	177	-	intergenic	exon	NA	NA	1	m	ENST00000427872	NONCO1120	TSS10981	TCONS_00013558	.
chr1	120895085	120895207	123	-	intergenic	exon	NA	NA	2	m	ENST00000427872	NONCO1120	TSS10981	TCONS_00013558	.
chr1	120903213	120903253	41	-	intergenic	exon	NA	NA	3	m	ENST00000427872	NONCO1120	TSS10981	TCONS_00013558	.
chr1	120905007	120905159	153	-	intergenic	exon	NA	NA	4	m	ENST00000427872	NONCO1120	TSS10981	TCONS_00013558	.
chr1	121102017	121104054	2038	-	intergenic	exon	NA	NA	1	m	ENST00000437515	NONCO1121	TSS10988	TCONS_00013566	.
chr1	121104613	121104749	137	-	intergenic	exon	NA	NA	2	m	ENST00000437515	NONCO1121	TSS10988	TCONS_00013566	.
chr1	121139341	121139526	186	-	intergenic	exon	NA	NA	3	m	ENST00000437515	NONCO1121	TSS10988	TCONS_00013566	.
chr1	121139623	121139765	143	-	intergenic	exon	NA	NA	4	m	ENST00000437515	NONCO1121	TSS10988	TCONS_00013566	.
chr1	121139338	121139526	189	-	intergenic	exon	NA	NA	1	m	ENST00000429055	NONCO1121	TSS10990	TCONS_00013569	.
chr1	121139623	121139699	77	-	intergenic	exon	NA	NA	2	m	ENST00000429055	NONCO1121	TSS10990	TCONS_00013569	.
chr1	121140525	121140666	142	-	intergenic	exon	NA	NA	3	m	ENST00000429055	NONCO1121	TSS10990	TCONS_00013569	.
chr1	121236177	121236393	217	-	intergenic	exon	NA	NA	1	m	ENST00000437523	NONCO1122	TSS10992	TCONS_00013571	.
chr1	121251539	121251602	64	-	intergenic	exon	NA	NA	2	m	ENST00000437523	NONCO1122	TSS10992	TCONS_00013571	.
chr1	121252154	121252181	28	-	intergenic	exon	NA	NA	3	m	ENST00000437523	NONCO1122	TSS10992	TCONS_00013571	.
chr1	121315744	121316076	333	-	intergenic	exon	NA	NA	1	m	ENST00000450546	NONCO1123	TSS10996	TCONS_00013575	.
chr1	121322230	121322322	93	-	intergenic	exon	NA	NA	2	m	ENST00000450546	NONCO1123	TSS10996	TCONS_00013575	.
chr1	142569266	142569311	46	-	intergenic	exon	NA	NA	1	m	ENST00000415979	NONCO1124	TSS10997	TCONS_00013576	r
chr1	142569981	142570081	101	-	intergenic	exon	NA	NA	2	m	ENST00000415979	NONCO1124	TSS10997	TCONS_00013576	r
chr1	142577487	142577534	48	-	intergenic	exon	NA	NA	3	m	ENST00000415979	NONCO1124	TSS10997	TCONS_00013576	r
chr1	142588067	142588233	167	-	intergenic	exon	NA	NA	4	m	ENST00000415979	NONCO1124	TSS10997	TCONS_00013576	r
chr1	142803224	142804609	1386	-	intergenic	exon	NA	NA	1	m	ENST00000423385	NONCO1125	TSS11004	TCONS_00013584	.
chr1	142805094	142805361	268	-	intergenic	exon	NA	NA	2	m	ENST00000423385	NONCO1125	TSS11004	TCONS_00013584	.
chr1	142815917	142816004	88	-	intergenic	exon	NA	NA	3	m	ENST00000423385	NONCO1125	TSS11004	TCONS_00013584	.
chr1	142950985	142951557	573	-	intergenic	exon	NA	NA	1	m	ENST00000424640	NONCO1126	TSS11008	TCONS_00013587	.
chr1	142952635	142952672	38	-	intergenic	exon	NA	NA	2	m	ENST00000424640	NONCO1126	TSS11008	TCONS_00013587	.
chr1	142956514	142956716	203	-	intergenic	exon	NA	NA	3	m	ENST00000424640	NONCO1126	TSS11008	TCONS_00013587	.
chr1	143211628	143211705	78	-	intergenic	exon	NA	NA	1	m	ENST00000437865	NONCO1127	TSS11015	TCONS_00013597	.
chr1	143213093	143213256	164	-	intergenic	exon	NA	NA	2	m	ENST00000437865	NONCO1127	TSS11015	TCONS_00013597	.
chr1	143217310	143217380	71	-	intergenic	exon	NA	NA	3	m	ENST00000437865	NONCO1127	TSS11015	TCONS_00013597	.
chr1	143223331	143223403	73	-	intergenic	exon	NA	NA	4	m	ENST00000437865	NONCO1127	TSS11015	TCONS_00013597	.
chr1	143223495	143223523	29	-	intergenic	exon	NA	NA	5	m	ENST00000437865	NONCO1127	TSS11015	TCONS_00013597	.
chr1	143226314	143226664	351	-	intergenic	exon	NA	NA	6	m	ENST00000437865	NONCO1127	TSS11015	TCONS_00013597	.
chr1	143213237	143213256	20	-	intergenic	exon	NA	NA	1	m	ENST00000422716	NONCO1127	TSS11016	TCONS_00013598	.
chr1	143217310	143217380	71	-	intergenic	exon	NA	NA	2	m	ENST00000422716	NONCO1127	TSS11016	TCONS_00013598	.
chr1	143223331	143223403	73	-	intergenic	exon	NA	NA	3	m	ENST00000422716	NONCO1127	TSS11016	TCONS_00013598	.
chr1	143223495	143223523	29	-	intergenic	exon	NA	NA	4	m	ENST00000422716	NONCO1127	TSS11016	TCONS_00013598	.
chr1	143226314	143226398	85	-	intergenic	exon	NA	NA	5	m	ENST00000422716	NONCO1127	TSS11016	TCONS_00013598	.
chr1	143230342	143230411	70	-	intergenic	exon	NA	NA	6	m	ENST00000422716	NONCO1127	TSS11016	TCONS_00013598	.
chr1	143231115	143231186	72	-	intergenic	exon	NA	NA	7	m	ENST00000422716	NONCO1127	TSS11016	TCONS_00013598	.
chr1	143233091	143233121	31	-	intergenic	exon	NA	NA	8	m	ENST00000422716	NONCO1127	TSS11016	TCONS_00013598	.
chr1	143240289	143240439	151	-	intergenic	exon	NA	NA	9	m	ENST00000422716	NONCO1127	TSS11016	TCONS_00013598	.
chr1	143216056	143216136	81	-	intergenic	exon	NA	NA	1	m	ENST00000435585	NONCO1127	TSS11017	TCONS_00013599	.
chr1	143217310	143217380	71	-	intergenic	exon	NA	NA	2	m	ENST00000435585	NONCO1127	TSS11017	TCONS_00013599	.
chr1	143223331	143223403	73	-	intergenic	exon	NA	NA	3	m	ENST00000435585	NONCO1127	TSS11017	TCONS_00013599	.
chr1	143223495	143223523	29	-	intergenic	exon	NA	NA	4	m	ENST00000435585	NONCO1127	TSS11017	TCONS_00013599	.
chr1	143226314	143226395	82	-	intergenic	exon	NA	NA	5	m	ENST00000435585	NONCO1127	TSS11017	TCONS_00013599	.
chr1	143220187	143220295	109	-	intergenic	exon	NA	NA	1	m	ENST00000456937	NONCO1127	TSS11017	TCONS_00013600	.
chr1	143223331	143223403	73	-	intergenic	exon	NA	NA	2	m	ENST00000456937	NONCO1127	TSS11017	TCONS_00013600	.
chr1	143223495	143223523	29	-	intergenic	exon	NA	NA	3	m	ENST00000456937	NONCO1127	TSS11017	TCONS_00013600	.
chr1	143226314	143226381	68	-	intergenic	exon	NA	NA	4	m	ENST00000456937	NONCO1127	TSS11017	TCONS_00013600	.
chr1	143223331	143223403	73	-	intergenic	exon	NA	NA	1	m	ENST00000429121	NONCO1127	TSS11016	TCONS_00013601	.
chr1	143223495	143223523	29	-	intergenic	exon	NA	NA	2	m	ENST00000429121	NONCO1127	TSS11016	TCONS_00013601	.
chr1	143226314	143226395	82	-	intergenic	exon	NA	NA	3	m	ENST00000429121	NONCO1127	TSS11016	TCONS_00013601	.
chr1	143227881	143228076	196	-	intergenic	exon	NA	NA	4	m	ENST00000429121	NONCO1127	TSS11016	TCONS_00013601	.
chr1	143230342	143230411	70	-	intergenic	exon	NA	NA	5	m	ENST00000429121	NONCO1127	TSS11016	TCONS_00013601	.
chr1	143233091	143233121	31	-	intergenic	exon	NA	NA	6	m	ENST00000429121	NONCO1127	TSS11016	TCONS_00013601	.
chr1	143237680	143237715	36	-	intergenic	exon	NA	NA	7	m	ENST00000429121	NONCO1127	TSS11016	TCONS_00013601	.
chr1	143240289	143240429	141	-	intergenic	exon	NA	NA	8	m	ENST00000429121	NONCO1127	TSS11016	TCONS_00013601	.
chr1	143229766	143230411	646	-	intergenic	exon	NA	NA	1	m	ENST00000427309	NONCO1127	TSS11018	TCONS_00013602	.
chr1	143233091	143233121	31	-	intergenic	exon	NA	NA	2	m	ENST00000427309	NONCO1127	TSS11018	TCONS_00013602	.
chr1	143236905	143237080	176	-	intergenic	exon	NA	NA	1	m	ENST00000453561	NONCO1127	TSS11016	TCONS_00013605	.
chr1	143240289	143240414	126	-	intergenic	exon	NA	NA	2	m	ENST00000453561	NONCO1127	TSS11016	TCONS_00013605	.
chr1	143354963	143356336	1374	-	intergenic	exon	NA	NA	1	m	ENST00000423249	NONCO1128	TSS11023	TCONS_00013608	.
chr1	143356823	143357090	268	-	intergenic	exon	NA	NA	2	m	ENST00000423249	NONCO1128	TSS11023	TCONS_00013608	.
chr1	143367656	143367743	88	-	intergenic	exon	NA	NA	3	m	ENST00000423249	NONCO1128	TSS11023	TCONS_00013608	.
chr1	143465380	143465438	59	-	intergenic	exon	NA	NA	4	m	ENST00000423249	NONCO1128	TSS11023	TCONS_00013608	.
chr1	143356065	143356336	272	-	intergenic	exon	NA	NA	1	m	ENST00000443548	NONCO1128	TSS11024	TCONS_00013609	.
chr1	143356823	143357105	283	-	intergenic	exon	NA	NA	2	m	ENST00000443548	NONCO1128	TSS11024	TCONS_00013609	.
chr1	143465380	143465438	59	-	intergenic	exon	NA	NA	3	m	ENST00000443548	NONCO1128	TSS11024	TCONS_00013609	.
chr1	143467466	143467532	67	-	intergenic	exon	NA	NA	4	m	ENST00000443548	NONCO1128	TSS11024	TCONS_00013609	.
chr1	143356625	143357090	466	-	intergenic	exon	NA	NA	1	m	ENST00000424068	NONCO1128	TSS11025	TCONS_00013610	.
chr1	143361969	143362013	45	-	intergenic	exon	NA	NA	2	m	ENST00000424068	NONCO1128	TSS11025	TCONS_00013610	.
chr1	143367656	143367743	88	-	intergenic	exon	NA	NA	3	m	ENST00000424068	NONCO1128	TSS11025	TCONS_00013610	.
chr1	143465380	143465438	59	-	intergenic	exon	NA	NA	4	m	ENST00000424068	NONCO1128	TSS11025	TCONS_00013610	.
chr1	143466849	143467304	456	-	intergenic	exon	NA	NA	5	m	ENST00000424068	NONCO1128	TSS11025	TCONS_00013610	.
chr1	143382245	143382605	361	-	intergenic	exon	NA	NA	1	m	ENST00000432361	NONCO1128	TSS11024	TCONS_00013611	.
chr1	143382800	143382933	134	-	intergenic	exon	NA	NA	2	m	ENST00000432361	NONCO1128	TSS11024	TCONS_00013611	.
chr1	143465380	143465438	59	-	intergenic	exon	NA	NA	3	m	ENST00000432361	NONCO1128	TSS11024	TCONS_00013611	.
chr1	143466849	143467632	784	-	intergenic	exon	NA	NA	4	m	ENST00000432361	NONCO1128	TSS11024	TCONS_00013611	.
chr1	143399412	143399696	285	-	intergenic	exon	NA	NA	1	m	ENST00000443766	NONCO1128	TSS11027	TCONS_00013612	.
chr1	143400872	143400973	102	-	intergenic	exon	NA	NA	2	m	ENST00000443766	NONCO1128	TSS11027	TCONS_00013612	.
chr1	143462284	143462343	60	-	intergenic	exon	NA	NA	3	m	ENST00000443766	NONCO1128	TSS11027	TCONS_00013612	.
chr1	143465380	143465438	59	-	intergenic	exon	NA	NA	4	m	ENST00000443766	NONCO1128	TSS11027	TCONS_00013612	.
chr1	143466849	143467041	193	-	intergenic	exon	NA	NA	5	m	ENST00000443766	NONCO1128	TSS11027	TCONS_00013612	.
chr1	143429879	143430840	962	-	intergenic	exon	NA	NA	1	m	ENST00000436326	NONCO1128	TSS11024	TCONS_00013614	.
chr1	143431283	143431485	203	-	intergenic	exon	NA	NA	2	m	ENST00000436326	NONCO1128	TSS11024	TCONS_00013614	.
chr1	143465380	143465438	59	-	intergenic	exon	NA	NA	3	m	ENST00000436326	NONCO1128	TSS11024	TCONS_00013614	.
chr1	143467571	143467630	60	-	intergenic	exon	NA	NA	4	m	ENST00000436326	NONCO1128	TSS11024	TCONS_00013614	.
chr1	143464645	143465438	794	-	intergenic	exon	NA	NA	1	m	ENST00000419027	NONCO1128	TSS11024	TCONS_00013616	.
chr1	143467571	143467613	43	-	intergenic	exon	NA	NA	2	m	ENST00000419027	NONCO1128	TSS11024	TCONS_00013616	.
chr1	143465380	143465438	59	-	intergenic	exon	NA	NA	1	m	ENST00000329536	NONCO1128	TSS11024	TCONS_00013617	.
chr1	143467364	143467604	241	-	intergenic	exon	NA	NA	2	m	ENST00000329536	NONCO1128	TSS11024	TCONS_00013617	.
chr1	143527555	143528126	572	-	intergenic	exon	NA	NA	1	m	ENST00000418607	NONCO1129	TSS11031	TCONS_00013618	.
chr1	143529198	143529235	38	-	intergenic	exon	NA	NA	2	m	ENST00000418607	NONCO1129	TSS11031	TCONS_00013618	.
chr1	143533069	143533272	204	-	intergenic	exon	NA	NA	3	m	ENST00000418607	NONCO1129	TSS11031	TCONS_00013618	.
chr1	143647638	143648030	393	-	intergenic	exon	NA	NA	1	m	ENST00000440199	NONCO1130	TSS11032	TCONS_00013619	.
chr1	143663878	143663987	110	-	intergenic	exon	NA	NA	2	m	ENST00000440199	NONCO1130	TSS11032	TCONS_00013619	.
chr1	143719663	143719955	293	-	intergenic	exon	NA	NA	1	m	ENST00000442423	NONCO1130	TSS11036	TCONS_00013622	.
chr1	143721045	143721171	127	-	intergenic	exon	NA	NA	2	m	ENST00000442423	NONCO1130	TSS11036	TCONS_00013622	.
chr1	143743240	143743293	54	-	intergenic	exon	NA	NA	1	m	ENST00000418192	NONCO1130	TSS11033	TCONS_00013623	.
chr1	143744201	143744355	155	-	intergenic	exon	NA	NA	2	m	ENST00000418192	NONCO1130	TSS11033	TCONS_00013623	.
chr1	143744199	143744298	100	-	intergenic	exon	NA	NA	1	m	ENST00000440862	NONCO1130	TSS11034	TCONS_00013626	.
chr1	143744511	143744717	207	-	intergenic	exon	NA	NA	2	m	ENST00000440862	NONCO1130	TSS11034	TCONS_00013626	.
chr1	144089214	144091251	2038	-	intergenic	exon	NA	NA	1	m	ENST00000441760	NONCO1131	TSS11043	TCONS_00013632	.
chr1	144091810	144091946	137	-	intergenic	exon	NA	NA	2	m	ENST00000441760	NONCO1131	TSS11043	TCONS_00013632	.
chr1	144275918	144276523	606	-	intergenic	exon	NA	NA	1	m	ENST00000426301	NONCO1132	TSS11044	TCONS_00013633	.
chr1	144277303	144277410	108	-	intergenic	exon	NA	NA	2	m	ENST00000426301	NONCO1132	TSS11044	TCONS_00013633	.
chr1	144279587	144279906	320	-	intergenic	exon	NA	NA	3	m	ENST00000426301	NONCO1132	TSS11044	TCONS_00013633	.
chr1	144280578	144280629	52	-	intergenic	exon	NA	NA	4	m	ENST00000426301	NONCO1132	TSS11044	TCONS_00013633	.
chr1	144284622	144284857	236	-	intergenic	exon	NA	NA	5	m	ENST00000426301	NONCO1132	TSS11044	TCONS_00013633	.
chr1	144276398	144276501	104	-	intergenic	exon	NA	NA	1	m	ENST00000422036	NONCO1132	TSS11045	TCONS_00013634	.
chr1	144277288	144277410	123	-	intergenic	exon	NA	NA	2	m	ENST00000422036	NONCO1132	TSS11045	TCONS_00013634	.
chr1	144279587	144279906	320	-	intergenic	exon	NA	NA	3	m	ENST00000422036	NONCO1132	TSS11045	TCONS_00013634	.
chr1	144284622	144284857	236	-	intergenic	exon	NA	NA	4	m	ENST00000422036	NONCO1132	TSS11045	TCONS_00013634	.
chr1	144311426	144311493	68	-	intergenic	exon	NA	NA	5	m	ENST00000422036	NONCO1132	TSS11045	TCONS_00013634	.
chr1	144276398	144276523	126	-	intergenic	exon	NA	NA	1	m	ENST00000446174	NONCO1132	TSS11045	TCONS_00013635	.
chr1	144277252	144277410	159	-	intergenic	exon	NA	NA	2	m	ENST00000446174	NONCO1132	TSS11045	TCONS_00013635	.
chr1	144284622	144284857	236	-	intergenic	exon	NA	NA	3	m	ENST00000446174	NONCO1132	TSS11045	TCONS_00013635	.
chr1	144311426	144311564	139	-	intergenic	exon	NA	NA	4	m	ENST00000446174	NONCO1132	TSS11045	TCONS_00013635	.
chr1	144276402	144276523	122	-	intergenic	exon	NA	NA	1	m	ENST00000411795	NONCO1132	TSS11044	TCONS_00013636	.
chr1	144280578	144280629	52	-	intergenic	exon	NA	NA	2	m	ENST00000411795	NONCO1132	TSS11044	TCONS_00013636	.
chr1	144281066	144281190	125	-	intergenic	exon	NA	NA	3	m	ENST00000411795	NONCO1132	TSS11044	TCONS_00013636	.
chr1	144284292	144284409	118	-	intergenic	exon	NA	NA	4	m	ENST00000411795	NONCO1132	TSS11044	TCONS_00013636	.
chr1	144284622	144284857	236	-	intergenic	exon	NA	NA	5	m	ENST00000411795	NONCO1132	TSS11044	TCONS_00013636	.
chr1	144277291	144277410	120	-	intergenic	exon	NA	NA	1	m	ENST00000429241	NONCO1132	TSS11045	TCONS_00013637	.
chr1	144279587	144279750	164	-	intergenic	exon	NA	NA	2	m	ENST00000429241	NONCO1132	TSS11045	TCONS_00013637	.
chr1	144280618	144280629	12	-	intergenic	exon	NA	NA	3	m	ENST00000429241	NONCO1132	TSS11045	TCONS_00013637	.
chr1	144281099	144281190	92	-	intergenic	exon	NA	NA	4	m	ENST00000429241	NONCO1132	TSS11045	TCONS_00013637	.
chr1	144283036	144283165	130	-	intergenic	exon	NA	NA	5	m	ENST00000429241	NONCO1132	TSS11045	TCONS_00013637	.
chr1	144284622	144284857	236	-	intergenic	exon	NA	NA	6	m	ENST00000429241	NONCO1132	TSS11045	TCONS_00013637	.
chr1	144311426	144311564	139	-	intergenic	exon	NA	NA	7	m	ENST00000429241	NONCO1132	TSS11045	TCONS_00013637	.
chr1	144280383	144280629	247	-	intergenic	exon	NA	NA	1	m	ENST00000449092	NONCO1132	TSS11046	TCONS_00013638	.
chr1	144280730	144280868	139	-	intergenic	exon	NA	NA	2	m	ENST00000449092	NONCO1132	TSS11046	TCONS_00013638	.
chr1	144281066	144281169	104	-	intergenic	exon	NA	NA	3	m	ENST00000449092	NONCO1132	TSS11046	TCONS_00013638	.
chr1	144281154	144281190	37	-	intergenic	exon	NA	NA	1	m	ENST00000452480	NONCO1132	TSS11047	TCONS_00013639	.
chr1	144284622	144284857	236	-	intergenic	exon	NA	NA	2	m	ENST00000452480	NONCO1132	TSS11047	TCONS_00013639	.
chr1	144290208	144290308	101	-	intergenic	exon	NA	NA	3	m	ENST00000452480	NONCO1132	TSS11047	TCONS_00013639	.
chr1	144281157	144281190	34	-	intergenic	exon	NA	NA	1	m	ENST00000436211	NONCO1132	TSS11048	TCONS_00013640	.
chr1	144284622	144284857	236	-	intergenic	exon	NA	NA	2	m	ENST00000436211	NONCO1132	TSS11048	TCONS_00013640	.
chr1	144289797	144289980	184	-	intergenic	exon	NA	NA	3	m	ENST00000436211	NONCO1132	TSS11048	TCONS_00013640	.
chr1	144284105	144284409	305	-	intergenic	exon	NA	NA	1	m	ENST00000418974	NONCO1132	TSS11045	TCONS_00013641	.
chr1	144284622	144284857	236	-	intergenic	exon	NA	NA	2	m	ENST00000418974	NONCO1132	TSS11045	TCONS_00013641	.
chr1	144311426	144311653	228	-	intergenic	exon	NA	NA	3	m	ENST00000418974	NONCO1132	TSS11045	TCONS_00013641	.
chr1	144833168	144833621	454	-	antisense_downstream	exon	NA	NA	1	m	ENST00000466343	NONCO1134	TSS11083	TCONS_00013675	r
chr1	144835453	144835867	415	-	antisense_downstream	exon	NA	NA	2	m	ENST00000466343	NONCO1134	TSS11083	TCONS_00013675	r
chr1	144836157	144836558	402	-	intergenic	exon	NA	NA	1	m	ENST00000469668	NONCO1135	TSS11084	TCONS_00013676	.
chr1	144837129	144837423	295	-	intergenic	exon	NA	NA	2	m	ENST00000469668	NONCO1135	TSS11084	TCONS_00013676	.
chr1	144837813	144837850	38	-	intergenic	exon	NA	NA	3	m	ENST00000469668	NONCO1135	TSS11084	TCONS_00013676	.
chr1	144836385	144836558	174	-	intergenic	exon	NA	NA	1	m	ENST00000528060	NONCO1135	TSS11086	TCONS_00013678	.
chr1	144836655	144836804	150	-	intergenic	exon	NA	NA	2	m	ENST00000528060	NONCO1135	TSS11086	TCONS_00013678	.
chr1	144837129	144837429	301	-	intergenic	exon	NA	NA	3	m	ENST00000528060	NONCO1135	TSS11086	TCONS_00013678	.
chr1	145373054	145373507	454	-	antisense_downstream	exon	NA	NA	1	m	ENST00000433081	NONCO1136	TSS11123	TCONS_00013737	.
chr1	145375343	145376447	1105	-	antisense_downstream	exon	NA	NA	2	m	ENST00000433081	NONCO1136	TSS11123	TCONS_00013737	.
chr1	145376544	145376692	149	-	antisense_downstream	exon	NA	NA	3	m	ENST00000433081	NONCO1136	TSS11123	TCONS_00013737	.
chr1	145382056	145382397	342	-	antisense_downstream	exon	NA	NA	4	m	ENST00000433081	NONCO1136	TSS11123	TCONS_00013737	.
chr1	145373296	145373507	212	-	antisense_downstream	exon	NA	NA	1	m	ENST00000457465	NONCO1136	TSS11124	TCONS_00013738	r
chr1	145376544	145376692	149	-	antisense_downstream	exon	NA	NA	2	m	ENST00000457465	NONCO1136	TSS11124	TCONS_00013738	r
chr1	145377017	145377311	295	-	antisense_downstream	exon	NA	NA	3	m	ENST00000457465	NONCO1136	TSS11124	TCONS_00013738	r
chr1	145373297	145373507	211	-	antisense_downstream	exon	NA	NA	1	m	ENST00000421937	NONCO1136	TSS11123	TCONS_00013739	r
chr1	145382056	145382378	323	-	antisense_downstream	exon	NA	NA	2	m	ENST00000421937	NONCO1136	TSS11123	TCONS_00013739	r
chr1	145375649	145376009	361	-	antisense_downstream	exon	NA	NA	1	m	ENST00000610154	NONCO1136	TSS11123	TCONS_00013740	.
chr1	145376544	145376692	149	-	antisense_downstream	exon	NA	NA	2	m	ENST00000610154	NONCO1136	TSS11123	TCONS_00013740	.
chr1	145382056	145382434	379	-	antisense_downstream	exon	NA	NA	3	m	ENST00000610154	NONCO1136	TSS11123	TCONS_00013740	.
chr1	145376327	145376447	121	-	antisense_downstream	exon	NA	NA	1	m	ENST00000419817	NONCO1136	TSS11123	TCONS_00013742	r
chr1	145376544	145376692	149	-	antisense_downstream	exon	NA	NA	2	m	ENST00000419817	NONCO1136	TSS11123	TCONS_00013742	r
chr1	145377017	145377311	295	-	antisense_downstream	exon	NA	NA	3	m	ENST00000419817	NONCO1136	TSS11123	TCONS_00013742	r
chr1	145382056	145382362	307	-	antisense_downstream	exon	NA	NA	4	m	ENST00000419817	NONCO1136	TSS11123	TCONS_00013742	r
chr1	146093234	146093306	73	-	intergenic	exon	NA	NA	1	m	ENST00000488578	NONCO1139	TSS11165	TCONS_00013812	.
chr1	146094842	146094908	67	-	intergenic	exon	NA	NA	2	m	ENST00000488578	NONCO1139	TSS11165	TCONS_00013812	.
chr1	146104733	146104838	106	-	intergenic	exon	NA	NA	3	m	ENST00000488578	NONCO1139	TSS11165	TCONS_00013812	.
chr1	146126404	146126726	323	-	intergenic	exon	NA	NA	4	m	ENST00000488578	NONCO1139	TSS11165	TCONS_00013812	.
chr1	146130440	146130539	100	-	intergenic	exon	NA	NA	5	m	ENST00000488578	NONCO1139	TSS11165	TCONS_00013812	.
chr1	146126404	146126726	323	-	intergenic	exon	NA	NA	1	m	ENST00000482381	NONCO1139	TSS11166	TCONS_00013813	.
chr1	146130440	146130539	100	-	intergenic	exon	NA	NA	2	m	ENST00000482381	NONCO1139	TSS11166	TCONS_00013813	.
chr1	146136069	146136197	129	-	intergenic	exon	NA	NA	3	m	ENST00000482381	NONCO1139	TSS11166	TCONS_00013813	.
chr1	146126404	146126726	323	-	intergenic	exon	NA	NA	1	m	ENST00000438173	NONCO1139	TSS11167	TCONS_00013814	.
chr1	146130440	146130539	100	-	intergenic	exon	NA	NA	2	m	ENST00000438173	NONCO1139	TSS11167	TCONS_00013814	.
chr1	146136069	146136137	69	-	intergenic	exon	NA	NA	3	m	ENST00000438173	NONCO1139	TSS11167	TCONS_00013814	.
chr1	146137047	146137078	32	-	intergenic	exon	NA	NA	4	m	ENST00000438173	NONCO1139	TSS11167	TCONS_00013814	.
chr1	146147383	146147576	194	-	intergenic	exon	NA	NA	5	m	ENST00000438173	NONCO1139	TSS11167	TCONS_00013814	.
chr1	146156940	146157067	128	-	intergenic	exon	NA	NA	6	m	ENST00000438173	NONCO1139	TSS11167	TCONS_00013814	.
chr1	146158433	146158514	82	-	intergenic	exon	NA	NA	7	m	ENST00000438173	NONCO1139	TSS11167	TCONS_00013814	.
chr1	146158981	146159102	122	-	intergenic	exon	NA	NA	8	m	ENST00000438173	NONCO1139	TSS11167	TCONS_00013814	.
chr1	146130445	146130539	95	-	intergenic	exon	NA	NA	1	m	ENST00000596091	NONCO1139	TSS11168	TCONS_00013815	.
chr1	146130976	146131078	103	-	intergenic	exon	NA	NA	2	m	ENST00000596091	NONCO1139	TSS11168	TCONS_00013815	.
chr1	146131853	146131923	71	-	intergenic	exon	NA	NA	3	m	ENST00000596091	NONCO1139	TSS11168	TCONS_00013815	.
chr1	146136069	146136137	69	-	intergenic	exon	NA	NA	4	m	ENST00000596091	NONCO1139	TSS11168	TCONS_00013815	.
chr1	146136940	146137078	139	-	intergenic	exon	NA	NA	5	m	ENST00000596091	NONCO1139	TSS11168	TCONS_00013815	.
chr1	146138978	146139099	122	-	intergenic	exon	NA	NA	6	m	ENST00000596091	NONCO1139	TSS11168	TCONS_00013815	.
chr1	146147383	146147524	142	-	intergenic	exon	NA	NA	7	m	ENST00000596091	NONCO1139	TSS11168	TCONS_00013815	.
chr1	146136447	146137078	632	-	intergenic	exon	NA	NA	1	m	ENST00000599387	NONCO1139	TSS11168	TCONS_00013816	.
chr1	146147383	146147524	142	-	intergenic	exon	NA	NA	2	m	ENST00000599387	NONCO1139	TSS11168	TCONS_00013816	.
chr1	146138288	146138329	42	-	intergenic	exon	NA	NA	1	m	ENST00000596220	NONCO1139	TSS11168	TCONS_00013817	.
chr1	146138978	146139099	122	-	intergenic	exon	NA	NA	2	m	ENST00000596220	NONCO1139	TSS11168	TCONS_00013817	.
chr1	146146485	146146751	267	-	intergenic	exon	NA	NA	3	m	ENST00000596220	NONCO1139	TSS11168	TCONS_00013817	.
chr1	146147383	146147524	142	-	intergenic	exon	NA	NA	4	m	ENST00000596220	NONCO1139	TSS11168	TCONS_00013817	.
chr1	146138539	146139099	561	-	intergenic	exon	NA	NA	1	m	ENST00000496508	NONCO1139	TSS11169	TCONS_00013818	.
chr1	146147383	146149334	1952	-	intergenic	exon	NA	NA	2	m	ENST00000496508	NONCO1139	TSS11169	TCONS_00013818	.
chr1	146138683	146139099	417	-	intergenic	exon	NA	NA	1	m	ENST00000464343	NONCO1139	TSS11170	TCONS_00013819	r
chr1	146147383	146147576	194	-	intergenic	exon	NA	NA	2	m	ENST00000464343	NONCO1139	TSS11170	TCONS_00013819	r
chr1	146156940	146157067	128	-	intergenic	exon	NA	NA	3	m	ENST00000464343	NONCO1139	TSS11170	TCONS_00013819	r
chr1	146138749	146139099	351	-	intergenic	exon	NA	NA	1	m	ENST00000596181	NONCO1139	TSS11167	TCONS_00013820	r
chr1	146147383	146147576	194	-	intergenic	exon	NA	NA	2	m	ENST00000596181	NONCO1139	TSS11167	TCONS_00013820	r
chr1	146158433	146158514	82	-	intergenic	exon	NA	NA	3	m	ENST00000596181	NONCO1139	TSS11167	TCONS_00013820	r
chr1	146158981	146159103	123	-	intergenic	exon	NA	NA	4	m	ENST00000596181	NONCO1139	TSS11167	TCONS_00013820	r
chr1	146139033	146139099	67	-	intergenic	exon	NA	NA	1	m	ENST00000594892	NONCO1139	TSS11171	TCONS_00013821	.
chr1	146147383	146147576	194	-	intergenic	exon	NA	NA	2	m	ENST00000594892	NONCO1139	TSS11171	TCONS_00013821	.
chr1	146155522	146155735	214	-	intergenic	exon	NA	NA	3	m	ENST00000594892	NONCO1139	TSS11171	TCONS_00013821	.
chr1	146156940	146157067	128	-	intergenic	exon	NA	NA	4	m	ENST00000594892	NONCO1139	TSS11171	TCONS_00013821	.
chr1	146158433	146158477	45	-	intergenic	exon	NA	NA	5	m	ENST00000594892	NONCO1139	TSS11171	TCONS_00013821	.
chr1	146147393	146147576	184	-	intergenic	exon	NA	NA	1	m	ENST00000597236	NONCO1139	TSS11167	TCONS_00013822	.
chr1	146155522	146155735	214	-	intergenic	exon	NA	NA	2	m	ENST00000597236	NONCO1139	TSS11167	TCONS_00013822	.
chr1	146156940	146157067	128	-	intergenic	exon	NA	NA	3	m	ENST00000597236	NONCO1139	TSS11167	TCONS_00013822	.
chr1	146157181	146157244	64	-	intergenic	exon	NA	NA	4	m	ENST00000597236	NONCO1139	TSS11167	TCONS_00013822	.
chr1	146158433	146158514	82	-	intergenic	exon	NA	NA	5	m	ENST00000597236	NONCO1139	TSS11167	TCONS_00013822	.
chr1	146158981	146159103	123	-	intergenic	exon	NA	NA	6	m	ENST00000597236	NONCO1139	TSS11167	TCONS_00013822	.
chr1	146147430	146147576	147	-	intergenic	exon	NA	NA	1	m	ENST00000598804	NONCO1139	TSS11167	TCONS_00013823	.
chr1	146155522	146155735	214	-	intergenic	exon	NA	NA	2	m	ENST00000598804	NONCO1139	TSS11167	TCONS_00013823	.
chr1	146156547	146156699	153	-	intergenic	exon	NA	NA	3	m	ENST00000598804	NONCO1139	TSS11167	TCONS_00013823	.
chr1	146156940	146157244	305	-	intergenic	exon	NA	NA	4	m	ENST00000598804	NONCO1139	TSS11167	TCONS_00013823	.
chr1	146158433	146158514	82	-	intergenic	exon	NA	NA	5	m	ENST00000598804	NONCO1139	TSS11167	TCONS_00013823	.
chr1	146158981	146159102	122	-	intergenic	exon	NA	NA	6	m	ENST00000598804	NONCO1139	TSS11167	TCONS_00013823	.
chr1	146986158	146986268	111	-	intergenic	exon	NA	NA	1	m	ENST00000437831	NONCO1140	TSS11199	TCONS_00013844	r
chr1	146987344	146987499	156	-	intergenic	exon	NA	NA	2	m	ENST00000437831	NONCO1140	TSS11199	TCONS_00013844	r
chr1	146989266	146989699	434	-	intergenic	exon	NA	NA	3	m	ENST00000437831	NONCO1140	TSS11199	TCONS_00013844	r
chr1	147744014	147744165	152	-	intergenic	exon	NA	NA	1	m	ENST00000428035	NONCO1143	TSS11223	TCONS_00013869	.
chr1	147745030	147745213	184	-	intergenic	exon	NA	NA	2	m	ENST00000428035	NONCO1143	TSS11223	TCONS_00013869	.
chr1	147752772	147752855	84	-	intergenic	exon	NA	NA	3	m	ENST00000428035	NONCO1143	TSS11223	TCONS_00013869	.
chr1	147760107	147760163	57	-	intergenic	exon	NA	NA	1	m	ENST00000441281	NONCO1144	TSS11225	TCONS_00013871	.
chr1	147760830	147761057	228	-	intergenic	exon	NA	NA	2	m	ENST00000441281	NONCO1144	TSS11225	TCONS_00013871	.
chr1	147767899	147768020	122	-	intergenic	exon	NA	NA	1	m	ENST00000445201	NONCO1145	TSS11228	TCONS_00013873	.
chr1	147768231	147768289	59	-	intergenic	exon	NA	NA	2	m	ENST00000445201	NONCO1145	TSS11228	TCONS_00013873	.
chr1	147768380	147768606	227	-	intergenic	exon	NA	NA	3	m	ENST00000445201	NONCO1145	TSS11228	TCONS_00013873	.
chr1	147769236	147769378	143	-	intergenic	exon	NA	NA	4	m	ENST00000445201	NONCO1145	TSS11228	TCONS_00013873	.
chr1	149305910	149306124	215	-	intergenic	exon	NA	NA	1	m	ENST00000449024	NONCO1152	TSS11261	TCONS_00013908	.
chr1	149307423	149307557	135	-	intergenic	exon	NA	NA	2	m	ENST00000449024	NONCO1152	TSS11261	TCONS_00013908	.
chr1	149312890	149313076	187	-	intergenic	exon	NA	NA	3	m	ENST00000449024	NONCO1152	TSS11261	TCONS_00013908	.
chr1	149372292	149374770	2479	-	intergenic	exon	NA	NA	1	m	ENST00000415338	NONCO1154	TSS11265	TCONS_00013911	.
chr1	149378586	149379646	1061	-	intergenic	exon	NA	NA	2	m	ENST00000415338	NONCO1154	TSS11265	TCONS_00013911	.
chr1	149576594	149576771	178	-	intergenic	exon	NA	NA	1	m	ENST00000447883	NONCO1155	TSS11268	TCONS_00013918	.
chr1	149576917	149577296	380	-	intergenic	exon	NA	NA	2	m	ENST00000447883	NONCO1155	TSS11268	TCONS_00013918	.
chr1	149590752	149590973	222	-	intergenic	exon	NA	NA	1	m	ENST00000428508	NONCO1156	TSS11270	TCONS_00013920	.
chr1	149591587	149591762	176	-	intergenic	exon	NA	NA	2	m	ENST00000428508	NONCO1156	TSS11270	TCONS_00013920	.
chr1	149691432	149691646	215	-	intergenic	exon	NA	NA	1	m	ENST00000432978	NONCO1158	TSS11273	TCONS_00013922	.
chr1	149692947	149693081	135	-	intergenic	exon	NA	NA	2	m	ENST00000432978	NONCO1158	TSS11273	TCONS_00013922	.
chr1	149698419	149698605	187	-	intergenic	exon	NA	NA	3	m	ENST00000432978	NONCO1158	TSS11273	TCONS_00013922	.
chr1	149691554	149691646	93	-	intergenic	exon	NA	NA	1	m	ENST00000609662	NONCO1158	TSS11274	TCONS_00013923	.
chr1	149692947	149693081	135	-	intergenic	exon	NA	NA	2	m	ENST00000609662	NONCO1158	TSS11274	TCONS_00013923	.
chr1	149694411	149694620	210	-	intergenic	exon	NA	NA	3	m	ENST00000609662	NONCO1158	TSS11274	TCONS_00013923	.
chr1	149694456	149694633	178	-	intergenic	exon	NA	NA	1	m	ENST00000609607	NONCO1158	TSS11275	TCONS_00013924	.
chr1	149698419	149698606	188	-	intergenic	exon	NA	NA	2	m	ENST00000609607	NONCO1158	TSS11275	TCONS_00013924	.
chr1	149699768	149699819	52	-	intergenic	exon	NA	NA	3	m	ENST00000609607	NONCO1158	TSS11275	TCONS_00013924	.
chr1	149699922	149699958	37	-	intergenic	exon	NA	NA	4	m	ENST00000609607	NONCO1158	TSS11275	TCONS_00013924	.
chr1	149694461	149694633	173	-	intergenic	exon	NA	NA	1	m	ENST00000584189	NONCO1158	TSS11273	TCONS_00013925	.
chr1	149698419	149698683	265	-	intergenic	exon	NA	NA	2	m	ENST00000584189	NONCO1158	TSS11273	TCONS_00013925	.
chr1	24526730	24526881	152	+	intergenic	exon	NA	NA	1	m	ENST00000439059	NONCO116	TSS1111	TCONS_00001299	.
chr1	24528954	24529089	136	+	intergenic	exon	NA	NA	2	m	ENST00000439059	NONCO116	TSS1111	TCONS_00001299	.
chr1	24536623	24538183	1561	+	intergenic	exon	NA	NA	3	m	ENST00000439059	NONCO116	TSS1111	TCONS_00001299	.
chr1	152902516	152904287	1772	-	intergenic	exon	NA	NA	1	m	ENST00000419578	NONCO1166	TSS11464	TCONS_00014249	.
chr1	152921462	152921686	225	-	intergenic	exon	NA	NA	2	m	ENST00000419578	NONCO1166	TSS11464	TCONS_00014249	.
chr1	153399496	153399644	149	-	antisense_downstream	exon	NA	NA	1	m	ENST00000432574	NONCO1169	TSS11489	TCONS_00014274	.
chr1	153400752	153400877	126	-	antisense_downstream	exon	NA	NA	2	m	ENST00000432574	NONCO1169	TSS11489	TCONS_00014274	.
chr1	24958207	24958268	62	+	intergenic	exon	NA	NA	1	m	ENST00000471693	NONCO117	TSS1134	TCONS_00001331	.
chr1	24959510	24959590	81	+	intergenic	exon	NA	NA	2	m	ENST00000471693	NONCO117	TSS1134	TCONS_00001331	.
chr1	24962135	24962368	234	+	intergenic	exon	NA	NA	3	m	ENST00000471693	NONCO117	TSS1134	TCONS_00001331	.
chr1	153689779	153690298	520	-	intergenic	exon	NA	NA	1	m	ENST00000454246	NONCO1170	TSS11528	TCONS_00014324	.
chr1	153690592	153690823	232	-	intergenic	exon	NA	NA	2	m	ENST00000454246	NONCO1170	TSS11528	TCONS_00014324	.
chr1	154349442	154349486	45	-	intergenic	exon	NA	NA	1	m	ENST00000449634	NONCO1172	TSS11578	TCONS_00014405	.
chr1	154350429	154350580	152	-	intergenic	exon	NA	NA	2	m	ENST00000449634	NONCO1172	TSS11578	TCONS_00014405	.
chr1	154351630	154351749	120	-	intergenic	exon	NA	NA	3	m	ENST00000449634	NONCO1172	TSS11578	TCONS_00014405	.
chr1	156416204	156416365	162	-	intergenic	exon	NA	NA	1	m	ENST00000441085	NONCO1181	TSS11776	TCONS_00014762	.
chr1	156424435	156424587	153	-	intergenic	exon	NA	NA	2	m	ENST00000441085	NONCO1181	TSS11776	TCONS_00014762	.
chr1	156425420	156425513	94	-	intergenic	exon	NA	NA	3	m	ENST00000441085	NONCO1181	TSS11776	TCONS_00014762	.
chr1	156426145	156426258	114	-	intergenic	exon	NA	NA	4	m	ENST00000441085	NONCO1181	TSS11776	TCONS_00014762	.
chr1	156422689	156423044	356	-	intergenic	exon	NA	NA	1	m	ENST00000452465	NONCO1181	TSS11777	TCONS_00014763	.
chr1	156425420	156425513	94	-	intergenic	exon	NA	NA	2	m	ENST00000452465	NONCO1181	TSS11777	TCONS_00014763	.
chr1	156426145	156426369	225	-	intergenic	exon	NA	NA	3	m	ENST00000452465	NONCO1181	TSS11777	TCONS_00014763	.
chr1	156657487	156660673	3187	-	intergenic	exon	NA	NA	1	m	ENST00000441272	NONCO1183	TSS11797	TCONS_00014799	.
chr1	156660855	156661789	935	-	intergenic	exon	NA	NA	2	m	ENST00000441272	NONCO1183	TSS11797	TCONS_00014799	.
chr1	157202021	157202330	310	-	intergenic	exon	NA	NA	1	m	ENST00000449345	NONCO1186	TSS11845	TCONS_00014851	r
chr1	157206838	157206926	89	-	intergenic	exon	NA	NA	2	m	ENST00000449345	NONCO1186	TSS11845	TCONS_00014851	r
chr1	157599729	157599986	258	-	intergenic	exon	NA	NA	1	m	ENST00000445687	NONCO1187	TSS11855	TCONS_00014866	.
chr1	157600272	157600518	247	-	intergenic	exon	NA	NA	2	m	ENST00000445687	NONCO1187	TSS11855	TCONS_00014866	.
chr1	157606090	157606364	275	-	intergenic	exon	NA	NA	1	m	ENST00000449287	NONCO1188	TSS11856	TCONS_00014867	.
chr1	157609815	157610091	277	-	intergenic	exon	NA	NA	2	m	ENST00000449287	NONCO1188	TSS11856	TCONS_00014867	.
chr1	158101834	158102191	358	-	intergenic	exon	NA	NA	1	m	ENST00000442358	NONCO1189	TSS11873	TCONS_00014897	.
chr1	158102368	158102446	79	-	intergenic	exon	NA	NA	2	m	ENST00000442358	NONCO1189	TSS11873	TCONS_00014897	.
chr1	158102905	158102983	79	-	intergenic	exon	NA	NA	3	m	ENST00000442358	NONCO1189	TSS11873	TCONS_00014897	.
chr1	158110288	158110420	133	-	intergenic	exon	NA	NA	4	m	ENST00000442358	NONCO1189	TSS11873	TCONS_00014897	.
chr1	158101834	158102446	613	-	intergenic	exon	NA	NA	1	m	ENST00000414848	NONCO1189	TSS11873	TCONS_00014898	.
chr1	158102905	158102983	79	-	intergenic	exon	NA	NA	2	m	ENST00000414848	NONCO1189	TSS11873	TCONS_00014898	.
chr1	158110288	158110429	142	-	intergenic	exon	NA	NA	3	m	ENST00000414848	NONCO1189	TSS11873	TCONS_00014898	.
chr1	158167712	158169625	1914	-	intergenic	exon	NA	NA	1	m	ENST00000415019	NONCO1190	TSS11876	TCONS_00014901	r
chr1	158173583	158173667	85	-	intergenic	exon	NA	NA	2	m	ENST00000415019	NONCO1190	TSS11876	TCONS_00014901	r
chr1	158236543	158236709	167	-	intergenic	exon	NA	NA	1	m	ENST00000448591	NONCO1191	TSS11877	TCONS_00014902	.
chr1	158237015	158237110	96	-	intergenic	exon	NA	NA	2	m	ENST00000448591	NONCO1191	TSS11877	TCONS_00014902	.
chr1	158711936	158712037	102	-	intergenic	exon	NA	NA	1	m	ENST00000447050	NONCO1193	TSS11902	TCONS_00014928	.
chr1	158712363	158713205	843	-	intergenic	exon	NA	NA	2	m	ENST00000447050	NONCO1193	TSS11902	TCONS_00014928	.
chr1	160901529	160901967	439	-	intergenic	exon	NA	NA	1	m	ENST00000427339	NONCO1198	TSS11998	TCONS_00015061	r
chr1	160904035	160904170	136	-	intergenic	exon	NA	NA	2	m	ENST00000427339	NONCO1198	TSS11998	TCONS_00015061	r
chr1	840214	840337	124	+	intergenic	exon	NA	NA	1	m	ENST00000607769	NONCO12	TSS64	TCONS_00000078	.
chr1	851130	851356	227	+	intergenic	exon	NA	NA	2	m	ENST00000607769	NONCO12	TSS64	TCONS_00000078	.
chr1	161735115	161735291	177	-	antisense_upstream	exon	NA	NA	1	m	ENST00000431097	NONCO1204	TSS12067	TCONS_00015201	.
chr1	161735620	161736017	398	-	antisense_upstream	exon	NA	NA	2	m	ENST00000431097	NONCO1204	TSS12067	TCONS_00015201	.
chr1	163392195	163392583	389	-	intergenic	exon	NA	NA	1	m	ENST00000430516	NONCO1208	TSS12090	TCONS_00015241	.
chr1	163392680	163392954	275	-	intergenic	exon	NA	NA	2	m	ENST00000430516	NONCO1208	TSS12090	TCONS_00015241	.
chr1	25534630	25534713	84	+	intergenic	exon	NA	NA	1	m	ENST00000455902	NONCO121	TSS1160	TCONS_00001366	r
chr1	25535025	25535360	336	+	intergenic	exon	NA	NA	2	m	ENST00000455902	NONCO121	TSS1160	TCONS_00001366	r
chr1	166356964	166357597	634	-	intergenic	exon	NA	NA	1	m	ENST00000448643	NONCO1213	TSS12129	TCONS_00015284	.
chr1	166421541	166421645	105	-	intergenic	exon	NA	NA	2	m	ENST00000448643	NONCO1213	TSS12129	TCONS_00015284	.
chr1	166421799	166421869	71	-	intergenic	exon	NA	NA	3	m	ENST00000448643	NONCO1213	TSS12129	TCONS_00015284	.
chr1	166445009	166445441	433	-	intergenic	exon	NA	NA	1	m	ENST00000426519	NONCO1214	TSS12130	TCONS_00015285	.
chr1	166446118	166446206	89	-	intergenic	exon	NA	NA	2	m	ENST00000426519	NONCO1214	TSS12130	TCONS_00015285	.
chr1	166459098	166459276	179	-	intergenic	exon	NA	NA	3	m	ENST00000426519	NONCO1214	TSS12130	TCONS_00015285	.
chr1	166864948	166865338	391	-	intergenic	exon	NA	NA	1	m	ENST00000414590	NONCO1215	TSS12133	TCONS_00015288	r
chr1	166876290	166876419	130	-	intergenic	exon	NA	NA	2	m	ENST00000414590	NONCO1215	TSS12133	TCONS_00015288	r
chr1	166877277	166877317	41	-	intergenic	exon	NA	NA	3	m	ENST00000414590	NONCO1215	TSS12133	TCONS_00015288	r
chr1	167145154	167145649	496	-	intergenic	exon	NA	NA	1	m	ENST00000426709	NONCO1216	TSS12141	TCONS_00015300	.
chr1	167145930	167146052	123	-	intergenic	exon	NA	NA	2	m	ENST00000426709	NONCO1216	TSS12141	TCONS_00015300	.
chr1	167151279	167151430	152	-	intergenic	exon	NA	NA	3	m	ENST00000426709	NONCO1216	TSS12141	TCONS_00015300	.
chr1	167164295	167164393	99	-	intergenic	exon	NA	NA	4	m	ENST00000426709	NONCO1216	TSS12141	TCONS_00015300	.
chr1	167164926	167165026	101	-	intergenic	exon	NA	NA	5	m	ENST00000426709	NONCO1216	TSS12141	TCONS_00015300	.
chr1	167145311	167146052	742	-	intergenic	exon	NA	NA	1	m	ENST00000428030	NONCO1216	TSS12142	TCONS_00015301	r
chr1	167164295	167164393	99	-	intergenic	exon	NA	NA	2	m	ENST00000428030	NONCO1216	TSS12142	TCONS_00015301	r
chr1	167164629	167164717	89	-	intergenic	exon	NA	NA	3	m	ENST00000428030	NONCO1216	TSS12142	TCONS_00015301	r
chr1	167145458	167146052	595	-	intergenic	exon	NA	NA	1	m	ENST00000457941	NONCO1216	TSS12141	TCONS_00015302	r
chr1	167151279	167151430	152	-	intergenic	exon	NA	NA	2	m	ENST00000457941	NONCO1216	TSS12141	TCONS_00015302	r
chr1	167164295	167164393	99	-	intergenic	exon	NA	NA	3	m	ENST00000457941	NONCO1216	TSS12141	TCONS_00015302	r
chr1	167164926	167164985	60	-	intergenic	exon	NA	NA	4	m	ENST00000457941	NONCO1216	TSS12141	TCONS_00015302	r
chr1	167145584	167146052	469	-	intergenic	exon	NA	NA	1	m	ENST00000446687	NONCO1216	TSS12141	TCONS_00015303	r
chr1	167151279	167151430	152	-	intergenic	exon	NA	NA	2	m	ENST00000446687	NONCO1216	TSS12141	TCONS_00015303	r
chr1	167164295	167164393	99	-	intergenic	exon	NA	NA	3	m	ENST00000446687	NONCO1216	TSS12141	TCONS_00015303	r
chr1	167164894	167165029	136	-	intergenic	exon	NA	NA	4	m	ENST00000446687	NONCO1216	TSS12141	TCONS_00015303	r
chr1	168370067	168371581	1515	-	intergenic	exon	NA	NA	1	m	ENST00000441851	NONCO1221	TSS12235	TCONS_00015364	.
chr1	168382031	168382174	144	-	intergenic	exon	NA	NA	2	m	ENST00000441851	NONCO1221	TSS12235	TCONS_00015364	.
chr1	168391368	168391442	75	-	intergenic	exon	NA	NA	3	m	ENST00000441851	NONCO1221	TSS12235	TCONS_00015364	.
chr1	168391828	168391894	67	-	intergenic	exon	NA	NA	4	m	ENST00000441851	NONCO1221	TSS12235	TCONS_00015364	.
chr1	168370721	168370768	48	-	intergenic	exon	NA	NA	1	m	ENST00000422548	NONCO1221	TSS12236	TCONS_00015365	.
chr1	168371277	168371581	305	-	intergenic	exon	NA	NA	2	m	ENST00000422548	NONCO1221	TSS12236	TCONS_00015365	.
chr1	168376477	168376512	36	-	intergenic	exon	NA	NA	3	m	ENST00000422548	NONCO1221	TSS12236	TCONS_00015365	.
chr1	168433452	168433611	160	-	intergenic	exon	NA	NA	1	m	ENST00000422253	NONCO1222	TSS12238	TCONS_00015367	r
chr1	168454481	168454544	64	-	intergenic	exon	NA	NA	2	m	ENST00000422253	NONCO1222	TSS12238	TCONS_00015367	r
chr1	168454811	168454969	159	-	intergenic	exon	NA	NA	3	m	ENST00000422253	NONCO1222	TSS12238	TCONS_00015367	r
chr1	168463284	168463362	79	-	intergenic	exon	NA	NA	4	m	ENST00000422253	NONCO1222	TSS12238	TCONS_00015367	r
chr1	168464826	168464882	57	-	intergenic	exon	NA	NA	5	m	ENST00000422253	NONCO1222	TSS12238	TCONS_00015367	r
chr1	168732603	168732854	252	-	intergenic	exon	NA	NA	1	m	ENST00000457405	NONCO1223	TSS12243	TCONS_00015372	.
chr1	168743563	168743728	166	-	intergenic	exon	NA	NA	2	m	ENST00000457405	NONCO1223	TSS12243	TCONS_00015372	.
chr1	168873143	168873950	808	-	intergenic	exon	NA	NA	1	m	ENST00000366408	NONCO1224	TSS12244	TCONS_00015373	.
chr1	168877097	168877208	112	-	intergenic	exon	NA	NA	2	m	ENST00000366408	NONCO1224	TSS12244	TCONS_00015373	.
chr1	169025422	169025471	50	-	intergenic	exon	NA	NA	3	m	ENST00000366408	NONCO1224	TSS12244	TCONS_00015373	.
chr1	169029650	169029757	108	-	intergenic	exon	NA	NA	4	m	ENST00000366408	NONCO1224	TSS12244	TCONS_00015373	.
chr1	169056193	169056243	51	-	intergenic	exon	NA	NA	5	m	ENST00000366408	NONCO1224	TSS12244	TCONS_00015373	.
chr1	170240744	170241122	379	-	intergenic	exon	NA	NA	1	m	ENST00000440404	NONCO1227	TSS12287	TCONS_00015440	.
chr1	170242674	170243648	975	-	intergenic	exon	NA	NA	2	m	ENST00000440404	NONCO1227	TSS12287	TCONS_00015440	.
chr1	170247971	170248073	103	-	intergenic	exon	NA	NA	3	m	ENST00000440404	NONCO1227	TSS12287	TCONS_00015440	.
chr1	170240908	170241122	215	-	intergenic	exon	NA	NA	1	m	ENST00000451439	NONCO1227	TSS12288	TCONS_00015441	.
chr1	170247971	170248073	103	-	intergenic	exon	NA	NA	2	m	ENST00000451439	NONCO1227	TSS12288	TCONS_00015441	.
chr1	170253280	170253349	70	-	intergenic	exon	NA	NA	3	m	ENST00000451439	NONCO1227	TSS12288	TCONS_00015441	.
chr1	25907969	25908263	295	+	intergenic	exon	NA	NA	1	m	ENST00000412797	NONCO123	TSS1193	TCONS_00001402	.
chr1	25916660	25916847	188	+	intergenic	exon	NA	NA	2	m	ENST00000412797	NONCO123	TSS1193	TCONS_00001402	.
chr1	171720683	171720919	237	-	intergenic	exon	NA	NA	1	m	ENST00000413827	NONCO1232	TSS12313	TCONS_00015466	.
chr1	171721022	171721165	144	-	intergenic	exon	NA	NA	2	m	ENST00000413827	NONCO1232	TSS12313	TCONS_00015466	.
chr1	173143439	173143713	275	-	intergenic	exon	NA	NA	1	m	ENST00000436974	NONCO1238	TSS12333	TCONS_00015484	r
chr1	173144228	173144642	415	-	intergenic	exon	NA	NA	2	m	ENST00000436974	NONCO1238	TSS12333	TCONS_00015484	r
chr1	173386932	173387761	830	-	antisense_upstream	exon	NA	NA	1	m	ENST00000367716	NONCO1239	TSS12339	TCONS_00015489	r
chr1	173429517	173430501	985	-	antisense_upstream	exon	NA	NA	2	m	ENST00000367716	NONCO1239	TSS12339	TCONS_00015489	r
chr1	173387213	173387761	549	-	antisense_upstream	exon	NA	NA	1	m	ENST00000437190	NONCO1239	TSS12342	TCONS_00015491	.
chr1	173409602	173409889	288	-	antisense_upstream	exon	NA	NA	2	m	ENST00000437190	NONCO1239	TSS12342	TCONS_00015491	.
chr1	173411058	173411236	179	-	antisense_upstream	exon	NA	NA	3	m	ENST00000437190	NONCO1239	TSS12342	TCONS_00015491	.
chr1	175172364	175173044	681	-	intergenic	exon	NA	NA	1	m	ENST00000412357	NONCO1244	TSS12388	TCONS_00015570	r
chr1	175173892	175173985	94	-	intergenic	exon	NA	NA	2	m	ENST00000412357	NONCO1244	TSS12388	TCONS_00015570	r
chr1	175873898	175874272	375	-	intergenic	exon	NA	NA	1	m	ENST00000426575	NONCO1246	TSS12395	TCONS_00015575	r
chr1	175877683	175877906	224	-	intergenic	exon	NA	NA	2	m	ENST00000426575	NONCO1246	TSS12395	TCONS_00015575	r
chr1	175889592	175889649	58	-	intergenic	exon	NA	NA	3	m	ENST00000426575	NONCO1246	TSS12395	TCONS_00015575	r
chr1	177362815	177362924	110	-	intergenic	exon	NA	NA	1	m	ENST00000458070	NONCO1248	TSS12422	TCONS_00015601	.
chr1	177542863	177542919	57	-	intergenic	exon	NA	NA	2	m	ENST00000458070	NONCO1248	TSS12422	TCONS_00015601	.
chr1	177545846	177546085	240	-	intergenic	exon	NA	NA	3	m	ENST00000458070	NONCO1248	TSS12422	TCONS_00015601	.
chr1	177566706	177566844	139	-	intergenic	exon	NA	NA	4	m	ENST00000458070	NONCO1248	TSS12422	TCONS_00015601	.
chr1	178465031	178465887	857	-	intergenic	exon	NA	NA	1	m	ENST00000445098	NONCO1251	TSS12439	TCONS_00015624	.
chr1	178466035	178466144	110	-	intergenic	exon	NA	NA	2	m	ENST00000445098	NONCO1251	TSS12439	TCONS_00015624	.
chr1	178466249	178466317	69	-	intergenic	exon	NA	NA	3	m	ENST00000445098	NONCO1251	TSS12439	TCONS_00015624	.
chr1	178468669	178468769	101	-	intergenic	exon	NA	NA	4	m	ENST00000445098	NONCO1251	TSS12439	TCONS_00015624	.
chr1	179895776	179895802	27	-	antisense_downstream	exon	NA	NA	1	m	ENST00000567486	NONCO1256	TSS12470	TCONS_00015665	r
chr1	179895930	179896031	102	-	antisense_downstream	exon	NA	NA	2	m	ENST00000567486	NONCO1256	TSS12470	TCONS_00015665	r
chr1	179910614	179910931	318	-	antisense_downstream	exon	NA	NA	3	m	ENST00000567486	NONCO1256	TSS12470	TCONS_00015665	r
chr1	180086275	180086450	176	-	antisense_downstream	exon	NA	NA	1	m	ENST00000566904	NONCO1257	TSS12473	TCONS_00015668	r
chr1	180092104	180092360	257	-	antisense_downstream	exon	NA	NA	2	m	ENST00000566904	NONCO1257	TSS12473	TCONS_00015668	r
chr1	180092953	180093025	73	-	antisense_downstream	exon	NA	NA	3	m	ENST00000566904	NONCO1257	TSS12473	TCONS_00015668	r
chr1	27306656	27307005	350	+	intergenic	exon	NA	NA	1	m	ENST00000310055	NONCO126	TSS1315	TCONS_00001586	.
chr1	27307320	27307466	147	+	intergenic	exon	NA	NA	2	m	ENST00000310055	NONCO126	TSS1315	TCONS_00001586	.
chr1	181159607	181159944	338	-	intergenic	exon	NA	NA	1	m	ENST00000456771	NONCO1260	TSS12489	TCONS_00015682	.
chr1	181160092	181160285	194	-	intergenic	exon	NA	NA	2	m	ENST00000456771	NONCO1260	TSS12489	TCONS_00015682	.
chr1	182096432	182096681	250	-	intergenic	exon	NA	NA	1	m	ENST00000412174	NONCO1262	TSS12492	TCONS_00015685	.
chr1	182096946	182097062	117	-	intergenic	exon	NA	NA	2	m	ENST00000412174	NONCO1262	TSS12492	TCONS_00015685	.
chr1	182097540	182097800	261	-	intergenic	exon	NA	NA	3	m	ENST00000412174	NONCO1262	TSS12492	TCONS_00015685	.
chr1	182098445	182098625	181	-	intergenic	exon	NA	NA	1	m	ENST00000608183	NONCO1263	TSS12493	TCONS_00015686	r
chr1	182099948	182100012	65	-	intergenic	exon	NA	NA	2	m	ENST00000608183	NONCO1263	TSS12493	TCONS_00015686	r
chr1	182100124	182100219	96	-	intergenic	exon	NA	NA	3	m	ENST00000608183	NONCO1263	TSS12493	TCONS_00015686	r
chr1	182100307	182100376	70	-	intergenic	exon	NA	NA	4	m	ENST00000608183	NONCO1263	TSS12493	TCONS_00015686	r
chr1	182100522	182100619	98	-	intergenic	exon	NA	NA	5	m	ENST00000608183	NONCO1263	TSS12493	TCONS_00015686	r
chr1	182100825	182100945	121	-	intergenic	exon	NA	NA	6	m	ENST00000608183	NONCO1263	TSS12493	TCONS_00015686	r
chr1	182102464	182102550	87	-	intergenic	exon	NA	NA	7	m	ENST00000608183	NONCO1263	TSS12493	TCONS_00015686	r
chr1	182122859	182122965	107	-	intergenic	exon	NA	NA	8	m	ENST00000608183	NONCO1263	TSS12493	TCONS_00015686	r
chr1	182125764	182125833	70	-	intergenic	exon	NA	NA	9	m	ENST00000608183	NONCO1263	TSS12493	TCONS_00015686	r
chr1	182131479	182131578	100	-	intergenic	exon	NA	NA	10	m	ENST00000608183	NONCO1263	TSS12493	TCONS_00015686	r
chr1	182131983	182132903	921	-	intergenic	exon	NA	NA	11	m	ENST00000608183	NONCO1263	TSS12493	TCONS_00015686	r
chr1	182136221	182136359	139	-	intergenic	exon	NA	NA	12	m	ENST00000608183	NONCO1263	TSS12493	TCONS_00015686	r
chr1	182173020	182173240	221	-	intergenic	exon	NA	NA	13	m	ENST00000608183	NONCO1263	TSS12493	TCONS_00015686	r
chr1	182173784	182173842	59	-	intergenic	exon	NA	NA	14	m	ENST00000608183	NONCO1263	TSS12493	TCONS_00015686	r
chr1	182188646	182188823	178	-	intergenic	exon	NA	NA	15	m	ENST00000608183	NONCO1263	TSS12493	TCONS_00015686	r
chr1	182212259	182212331	73	-	intergenic	exon	NA	NA	16	m	ENST00000608183	NONCO1263	TSS12493	TCONS_00015686	r
chr1	182213490	182213534	45	-	intergenic	exon	NA	NA	17	m	ENST00000608183	NONCO1263	TSS12493	TCONS_00015686	r
chr1	182159255	182159374	120	-	intergenic	exon	NA	NA	1	m	ENST00000420760	NONCO1263	TSS12494	TCONS_00015688	.
chr1	182173020	182173160	141	-	intergenic	exon	NA	NA	2	m	ENST00000420760	NONCO1263	TSS12494	TCONS_00015688	.
chr1	182173080	182173240	161	-	intergenic	exon	NA	NA	1	m	ENST00000449842	NONCO1263	TSS12495	TCONS_00015689	.
chr1	182282625	182282920	296	-	intergenic	exon	NA	NA	2	m	ENST00000449842	NONCO1263	TSS12495	TCONS_00015689	.
chr1	182283083	182283196	114	-	intergenic	exon	NA	NA	3	m	ENST00000449842	NONCO1263	TSS12495	TCONS_00015689	.
chr1	183430009	183430803	795	-	antisense_upstream	exon	NA	NA	1	m	ENST00000421703	NONCO1266	TSS12531	TCONS_00015730	.
chr1	183430901	183431096	196	-	antisense_upstream	exon	NA	NA	2	m	ENST00000421703	NONCO1266	TSS12531	TCONS_00015730	.
chr1	183438809	183438934	126	-	antisense_upstream	exon	NA	NA	3	m	ENST00000421703	NONCO1266	TSS12531	TCONS_00015730	.
chr1	183439600	183439675	76	-	antisense_upstream	exon	NA	NA	4	m	ENST00000421703	NONCO1266	TSS12531	TCONS_00015730	.
chr1	183439855	183440881	1027	-	antisense_upstream	exon	NA	NA	5	m	ENST00000421703	NONCO1266	TSS12531	TCONS_00015730	.
chr1	183430881	183430974	94	-	antisense_upstream	exon	NA	NA	1	m	ENST00000432837	NONCO1266	TSS12531	TCONS_00015731	.
chr1	183438809	183438934	126	-	antisense_upstream	exon	NA	NA	2	m	ENST00000432837	NONCO1266	TSS12531	TCONS_00015731	.
chr1	183439600	183439675	76	-	antisense_upstream	exon	NA	NA	3	m	ENST00000432837	NONCO1266	TSS12531	TCONS_00015731	.
chr1	183439855	183439977	123	-	antisense_upstream	exon	NA	NA	4	m	ENST00000432837	NONCO1266	TSS12531	TCONS_00015731	.
chr1	183440818	183440864	47	-	antisense_upstream	exon	NA	NA	5	m	ENST00000432837	NONCO1266	TSS12531	TCONS_00015731	.
chr1	185527504	185527807	304	-	intergenic	exon	NA	NA	1	m	ENST00000609066	NONCO1272	TSS12582	TCONS_00015791	r
chr1	185532371	185532460	90	-	intergenic	exon	NA	NA	2	m	ENST00000609066	NONCO1272	TSS12582	TCONS_00015791	r
chr1	185534606	185534699	94	-	intergenic	exon	NA	NA	3	m	ENST00000609066	NONCO1272	TSS12582	TCONS_00015791	r
chr1	185527504	185527807	304	-	intergenic	exon	NA	NA	1	m	ENST00000439633	NONCO1272	TSS12582	TCONS_00015792	r
chr1	185532300	185532460	161	-	intergenic	exon	NA	NA	2	m	ENST00000439633	NONCO1272	TSS12582	TCONS_00015792	r
chr1	185534606	185534763	158	-	intergenic	exon	NA	NA	3	m	ENST00000439633	NONCO1272	TSS12582	TCONS_00015792	r
chr1	185527514	185527807	294	-	intergenic	exon	NA	NA	1	m	ENST00000608417	NONCO1272	TSS12583	TCONS_00015793	r
chr1	185532300	185532460	161	-	intergenic	exon	NA	NA	2	m	ENST00000608417	NONCO1272	TSS12583	TCONS_00015793	r
chr1	185595624	185595687	64	-	intergenic	exon	NA	NA	3	m	ENST00000608417	NONCO1272	TSS12583	TCONS_00015793	r
chr1	185597539	185597620	82	-	intergenic	exon	NA	NA	4	m	ENST00000608417	NONCO1272	TSS12583	TCONS_00015793	r
chr1	185576316	185576533	218	-	intergenic	exon	NA	NA	1	m	ENST00000436955	NONCO1272	TSS12583	TCONS_00015794	r
chr1	185590593	185590718	126	-	intergenic	exon	NA	NA	2	m	ENST00000436955	NONCO1272	TSS12583	TCONS_00015794	r
chr1	185591859	185591971	113	-	intergenic	exon	NA	NA	3	m	ENST00000436955	NONCO1272	TSS12583	TCONS_00015794	r
chr1	185595624	185595687	64	-	intergenic	exon	NA	NA	4	m	ENST00000436955	NONCO1272	TSS12583	TCONS_00015794	r
chr1	185597539	185597659	121	-	intergenic	exon	NA	NA	5	m	ENST00000436955	NONCO1272	TSS12583	TCONS_00015794	r
chr1	187475970	187476115	146	-	intergenic	exon	NA	NA	1	m	ENST00000603098	NONCO1275	TSS12604	TCONS_00015816	.
chr1	187476138	187476251	114	-	intergenic	exon	NA	NA	2	m	ENST00000603098	NONCO1275	TSS12604	TCONS_00015816	.
chr1	188674754	188675416	663	-	intergenic	exon	NA	NA	1	m	ENST00000432976	NONCO1276	TSS12609	TCONS_00015821	.
chr1	188679942	188680011	70	-	intergenic	exon	NA	NA	2	m	ENST00000432976	NONCO1276	TSS12609	TCONS_00015821	.
chr1	188838608	188838879	272	-	intergenic	exon	NA	NA	1	m	ENST00000414765	NONCO1277	TSS12610	TCONS_00015822	r
chr1	188856372	188856565	194	-	intergenic	exon	NA	NA	2	m	ENST00000414765	NONCO1277	TSS12610	TCONS_00015822	r
chr1	189837131	189837342	212	-	intergenic	exon	NA	NA	1	m	ENST00000450681	NONCO1278	TSS12613	TCONS_00015825	r
chr1	189837457	189837658	202	-	intergenic	exon	NA	NA	2	m	ENST00000450681	NONCO1278	TSS12613	TCONS_00015825	r
chr1	191190289	191190442	154	-	intergenic	exon	NA	NA	1	m	ENST00000434983	NONCO1279	TSS12621	TCONS_00015833	.
chr1	191197453	191197597	145	-	intergenic	exon	NA	NA	2	m	ENST00000434983	NONCO1279	TSS12621	TCONS_00015833	.
chr1	191827837	191828310	474	-	intergenic	exon	NA	NA	1	m	ENST00000432083	NONCO1280	TSS12622	TCONS_00015834	.
chr1	191835950	191836090	141	-	intergenic	exon	NA	NA	2	m	ENST00000432083	NONCO1280	TSS12622	TCONS_00015834	.
chr1	191827893	191828310	418	-	intergenic	exon	NA	NA	1	m	ENST00000428569	NONCO1280	TSS12623	TCONS_00015835	.
chr1	191859195	191859359	165	-	intergenic	exon	NA	NA	2	m	ENST00000428569	NONCO1280	TSS12623	TCONS_00015835	.
chr1	192486769	192487093	325	-	intergenic	exon	NA	NA	1	m	ENST00000434300	NONCO1281	TSS12626	TCONS_00015838	.
chr1	192536277	192536347	71	-	intergenic	exon	NA	NA	2	m	ENST00000434300	NONCO1281	TSS12626	TCONS_00015838	.
chr1	192906430	192906550	121	-	intergenic	exon	NA	NA	1	m	ENST00000451690	NONCO1282	TSS12629	TCONS_00015841	.
chr1	192917233	192917387	155	-	intergenic	exon	NA	NA	2	m	ENST00000451690	NONCO1282	TSS12629	TCONS_00015841	.
chr1	193653376	193653841	466	-	intergenic	exon	NA	NA	1	m	ENST00000447056	NONCO1283	TSS12645	TCONS_00015864	.
chr1	193654710	193654919	210	-	intergenic	exon	NA	NA	2	m	ENST00000447056	NONCO1283	TSS12645	TCONS_00015864	.
chr1	193657386	193657559	174	-	intergenic	exon	NA	NA	3	m	ENST00000447056	NONCO1283	TSS12645	TCONS_00015864	.
chr1	196014126	196014669	544	-	intergenic	exon	NA	NA	1	m	ENST00000430519	NONCO1284	TSS12647	TCONS_00015866	.
chr1	196030127	196030203	77	-	intergenic	exon	NA	NA	2	m	ENST00000430519	NONCO1284	TSS12647	TCONS_00015866	.
chr1	198566854	198567113	260	-	intergenic	exon	NA	NA	1	m	ENST00000429469	NONCO1287	TSS12691	TCONS_00015903	.
chr1	198567896	198567998	103	-	intergenic	exon	NA	NA	2	m	ENST00000429469	NONCO1287	TSS12691	TCONS_00015903	.
chr1	198776622	198777372	751	-	intergenic	exon	NA	NA	1	m	ENST00000412162	NONCO1290	TSS12694	TCONS_00015906	.
chr1	198796155	198796345	191	-	intergenic	exon	NA	NA	2	m	ENST00000412162	NONCO1290	TSS12694	TCONS_00015906	.
chr1	198776787	198777372	586	-	intergenic	exon	NA	NA	1	m	ENST00000432296	NONCO1290	TSS12695	TCONS_00015907	.
chr1	198869540	198869698	159	-	intergenic	exon	NA	NA	2	m	ENST00000432296	NONCO1290	TSS12695	TCONS_00015907	.
chr1	198906355	198906539	185	-	intergenic	exon	NA	NA	3	m	ENST00000432296	NONCO1290	TSS12695	TCONS_00015907	.
chr1	198867595	198869698	2104	-	intergenic	exon	NA	NA	1	m	ENST00000436880	NONCO1290	TSS12695	TCONS_00015910	.
chr1	198906355	198906558	204	-	intergenic	exon	NA	NA	2	m	ENST00000436880	NONCO1290	TSS12695	TCONS_00015910	.
chr1	198975169	198976558	1390	-	intergenic	exon	NA	NA	1	m	ENST00000427439	NONCO1291	TSS12698	TCONS_00015912	r
chr1	198977523	198977697	175	-	intergenic	exon	NA	NA	2	m	ENST00000427439	NONCO1291	TSS12698	TCONS_00015912	r
chr1	198989947	198990166	220	-	intergenic	exon	NA	NA	3	m	ENST00000427439	NONCO1291	TSS12698	TCONS_00015912	r
chr1	203209458	203209556	99	-	intergenic	exon	NA	NA	1	m	ENST00000460619	NONCO1304	TSS12840	TCONS_00016104	.
chr1	203209755	203209786	32	-	intergenic	exon	NA	NA	2	m	ENST00000460619	NONCO1304	TSS12840	TCONS_00016104	.
chr1	203242504	203242769	266	-	intergenic	exon	NA	NA	3	m	ENST00000460619	NONCO1304	TSS12840	TCONS_00016104	.
chr1	203267886	203269775	1890	-	antisense_upstream	exon	NA	NA	1	m	ENST00000457348	NONCO1305	TSS12841	TCONS_00016105	.
chr1	203270218	203270409	192	-	antisense_upstream	exon	NA	NA	2	m	ENST00000457348	NONCO1305	TSS12841	TCONS_00016105	.
chr1	203273981	203274437	457	-	antisense_upstream	exon	NA	NA	3	m	ENST00000457348	NONCO1305	TSS12841	TCONS_00016105	.
chr1	204001575	204002378	804	-	intergenic	exon	NA	NA	1	m	ENST00000367207	NONCO1306	TSS12890	TCONS_00016121	.
chr1	204002833	204002995	163	-	intergenic	exon	NA	NA	2	m	ENST00000367207	NONCO1306	TSS12890	TCONS_00016121	.
chr1	204006097	204006716	620	-	intergenic	exon	NA	NA	3	m	ENST00000367207	NONCO1306	TSS12890	TCONS_00016121	.
chr1	204009393	204009522	130	-	intergenic	exon	NA	NA	4	m	ENST00000367207	NONCO1306	TSS12890	TCONS_00016121	.
chr1	204010220	204010393	174	-	intergenic	exon	NA	NA	5	m	ENST00000367207	NONCO1306	TSS12890	TCONS_00016121	.
chr1	204002062	204002378	317	-	intergenic	exon	NA	NA	1	m	ENST00000418245	NONCO1306	TSS12890	TCONS_00016122	.
chr1	204002833	204002995	163	-	intergenic	exon	NA	NA	2	m	ENST00000418245	NONCO1306	TSS12890	TCONS_00016122	.
chr1	204006384	204006716	333	-	intergenic	exon	NA	NA	3	m	ENST00000418245	NONCO1306	TSS12890	TCONS_00016122	.
chr1	204009393	204009522	130	-	intergenic	exon	NA	NA	4	m	ENST00000418245	NONCO1306	TSS12890	TCONS_00016122	.
chr1	204010220	204010392	173	-	intergenic	exon	NA	NA	5	m	ENST00000418245	NONCO1306	TSS12890	TCONS_00016122	.
chr1	204002062	204002378	317	-	intergenic	exon	NA	NA	1	m	ENST00000427799	NONCO1306	TSS12890	TCONS_00016123	.
chr1	204002833	204002995	163	-	intergenic	exon	NA	NA	2	m	ENST00000427799	NONCO1306	TSS12890	TCONS_00016123	.
chr1	204006097	204006212	116	-	intergenic	exon	NA	NA	3	m	ENST00000427799	NONCO1306	TSS12890	TCONS_00016123	.
chr1	204006589	204006716	128	-	intergenic	exon	NA	NA	4	m	ENST00000427799	NONCO1306	TSS12890	TCONS_00016123	.
chr1	204009393	204009522	130	-	intergenic	exon	NA	NA	5	m	ENST00000427799	NONCO1306	TSS12890	TCONS_00016123	.
chr1	204010220	204010393	174	-	intergenic	exon	NA	NA	6	m	ENST00000427799	NONCO1306	TSS12890	TCONS_00016123	.
chr1	27852316	27852396	81	+	antisense_downstream	exon	NA	NA	1	m	ENST00000443579	NONCO131	TSS1355	TCONS_00001622	r
chr1	27856871	27857072	202	+	antisense_downstream	exon	NA	NA	2	m	ENST00000443579	NONCO131	TSS1355	TCONS_00001622	r
chr1	206214526	206214841	316	-	antisense_upstream	exon	NA	NA	1	m	ENST00000425896	NONCO1311	TSS13009	TCONS_00016235	.
chr1	206222991	206223261	271	-	antisense_upstream	exon	NA	NA	2	m	ENST00000425896	NONCO1311	TSS13009	TCONS_00016235	.
chr1	206223506	206223548	43	-	antisense_upstream	exon	NA	NA	3	m	ENST00000425896	NONCO1311	TSS13009	TCONS_00016235	.
chr1	207974863	207989425	14563	-	intergenic	exon	NA	NA	1	m	ENST00000608023	NONCO1316	TSS13051	TCONS_00016287	.
chr1	207990584	207990759	176	-	intergenic	exon	NA	NA	2	m	ENST00000608023	NONCO1316	TSS13051	TCONS_00016287	.
chr1	207992307	207992491	185	-	intergenic	exon	NA	NA	3	m	ENST00000608023	NONCO1316	TSS13051	TCONS_00016287	.
chr1	208041271	208041368	98	-	intergenic	exon	NA	NA	4	m	ENST00000608023	NONCO1316	TSS13051	TCONS_00016287	.
chr1	208042373	208042495	123	-	intergenic	exon	NA	NA	5	m	ENST00000608023	NONCO1316	TSS13051	TCONS_00016287	.
chr1	207986905	207989425	2521	-	intergenic	exon	NA	NA	1	m	ENST00000487977	NONCO1316	TSS13052	TCONS_00016288	.
chr1	207990584	207990759	176	-	intergenic	exon	NA	NA	2	m	ENST00000487977	NONCO1316	TSS13052	TCONS_00016288	.
chr1	207995549	207996048	500	-	intergenic	exon	NA	NA	3	m	ENST00000487977	NONCO1316	TSS13052	TCONS_00016288	.
chr1	207990582	207990759	178	-	intergenic	exon	NA	NA	1	m	ENST00000415882	NONCO1316	TSS13051	TCONS_00016289	.
chr1	207992307	207992491	185	-	intergenic	exon	NA	NA	2	m	ENST00000415882	NONCO1316	TSS13051	TCONS_00016289	.
chr1	208041271	208041368	98	-	intergenic	exon	NA	NA	3	m	ENST00000415882	NONCO1316	TSS13051	TCONS_00016289	.
chr1	208042373	208042495	123	-	intergenic	exon	NA	NA	4	m	ENST00000415882	NONCO1316	TSS13051	TCONS_00016289	.
chr1	208047140	208047428	289	-	intergenic	exon	NA	NA	1	m	ENST00000435542	NONCO1317	TSS13053	TCONS_00016290	.
chr1	208048235	208048314	80	-	intergenic	exon	NA	NA	2	m	ENST00000435542	NONCO1317	TSS13053	TCONS_00016290	.
chr1	208052225	208052418	194	-	intergenic	exon	NA	NA	3	m	ENST00000435542	NONCO1317	TSS13053	TCONS_00016290	.
chr1	208780445	208780620	176	-	intergenic	exon	NA	NA	1	m	ENST00000568112	NONCO1318	TSS13065	TCONS_00016304	.
chr1	208785435	208785537	103	-	intergenic	exon	NA	NA	2	m	ENST00000568112	NONCO1318	TSS13065	TCONS_00016304	.
chr1	208800086	208800258	173	-	intergenic	exon	NA	NA	1	m	ENST00000567538	NONCO1319	TSS13066	TCONS_00016305	.
chr1	208801319	208801430	112	-	intergenic	exon	NA	NA	2	m	ENST00000567538	NONCO1319	TSS13066	TCONS_00016305	.
chr1	209320612	209320939	328	-	intergenic	exon	NA	NA	1	m	ENST00000416349	NONCO1320	TSS13068	TCONS_00016307	.
chr1	209324750	209324850	101	-	intergenic	exon	NA	NA	2	m	ENST00000416349	NONCO1320	TSS13068	TCONS_00016307	.
chr1	209328403	209328446	44	-	intergenic	exon	NA	NA	3	m	ENST00000416349	NONCO1320	TSS13068	TCONS_00016307	.
chr1	209701800	209702024	225	-	intergenic	exon	NA	NA	1	m	ENST00000424696	NONCO1321	TSS13072	TCONS_00016311	.
chr1	209704592	209704719	128	-	intergenic	exon	NA	NA	2	m	ENST00000424696	NONCO1321	TSS13072	TCONS_00016311	.
chr1	209714043	209714133	91	-	intergenic	exon	NA	NA	3	m	ENST00000424696	NONCO1321	TSS13072	TCONS_00016311	.
chr1	209714653	209714774	122	-	intergenic	exon	NA	NA	4	m	ENST00000424696	NONCO1321	TSS13072	TCONS_00016311	.
chr1	209719402	209719484	83	-	intergenic	exon	NA	NA	5	m	ENST00000424696	NONCO1321	TSS13072	TCONS_00016311	.
chr1	209740257	209740332	76	-	intergenic	exon	NA	NA	6	m	ENST00000424696	NONCO1321	TSS13072	TCONS_00016311	.
chr1	209740881	209741018	138	-	intergenic	exon	NA	NA	7	m	ENST00000424696	NONCO1321	TSS13072	TCONS_00016311	.
chr1	209701886	209702024	139	-	intergenic	exon	NA	NA	1	m	ENST00000453331	NONCO1321	TSS13071	TCONS_00016313	.
chr1	209714043	209714133	91	-	intergenic	exon	NA	NA	2	m	ENST00000453331	NONCO1321	TSS13071	TCONS_00016313	.
chr1	209714653	209714774	122	-	intergenic	exon	NA	NA	3	m	ENST00000453331	NONCO1321	TSS13071	TCONS_00016313	.
chr1	209716191	209716263	73	-	intergenic	exon	NA	NA	4	m	ENST00000453331	NONCO1321	TSS13071	TCONS_00016313	.
chr1	209719358	209719484	127	-	intergenic	exon	NA	NA	5	m	ENST00000453331	NONCO1321	TSS13071	TCONS_00016313	.
chr1	209720837	209720925	89	-	intergenic	exon	NA	NA	6	m	ENST00000453331	NONCO1321	TSS13071	TCONS_00016313	.
chr1	211809248	211809787	540	-	intergenic	exon	NA	NA	1	m	ENST00000452024	NONCO1326	TSS13107	TCONS_00016350	.
chr1	211816165	211816209	45	-	intergenic	exon	NA	NA	2	m	ENST00000452024	NONCO1326	TSS13107	TCONS_00016350	.
chr1	212398620	212398855	236	-	intergenic	exon	NA	NA	1	m	ENST00000443448	NONCO1327	TSS13136	TCONS_00016377	.
chr1	212403545	212403601	57	-	intergenic	exon	NA	NA	2	m	ENST00000443448	NONCO1327	TSS13136	TCONS_00016377	.
chr1	212407845	212407888	44	-	intergenic	exon	NA	NA	3	m	ENST00000443448	NONCO1327	TSS13136	TCONS_00016377	.
chr1	212398622	212398855	234	-	intergenic	exon	NA	NA	1	m	ENST00000412221	NONCO1327	TSS13137	TCONS_00016378	.
chr1	212399778	212399880	103	-	intergenic	exon	NA	NA	2	m	ENST00000412221	NONCO1327	TSS13137	TCONS_00016378	.
chr1	212398622	212398855	234	-	intergenic	exon	NA	NA	1	m	ENST00000431307	NONCO1327	TSS13138	TCONS_00016379	.
chr1	212403545	212403601	57	-	intergenic	exon	NA	NA	2	m	ENST00000431307	NONCO1327	TSS13138	TCONS_00016379	.
chr1	212412249	212412319	71	-	intergenic	exon	NA	NA	3	m	ENST00000431307	NONCO1327	TSS13138	TCONS_00016379	.
chr1	212640158	212640439	282	-	intergenic	exon	NA	NA	1	m	ENST00000439570	NONCO1331	TSS13152	TCONS_00016393	.
chr1	212641009	212641085	77	-	intergenic	exon	NA	NA	2	m	ENST00000439570	NONCO1331	TSS13152	TCONS_00016393	.
chr1	212827341	212827613	273	-	intergenic	exon	NA	NA	1	m	ENST00000446962	NONCO1332	TSS13155	TCONS_00016396	.
chr1	212837929	212838029	101	-	intergenic	exon	NA	NA	2	m	ENST00000446962	NONCO1332	TSS13155	TCONS_00016396	.
chr1	212838678	212838776	99	-	intergenic	exon	NA	NA	3	m	ENST00000446962	NONCO1332	TSS13155	TCONS_00016396	.
chr1	213025450	213027651	2202	-	antisense_upstream	exon	NA	NA	1	m	ENST00000356684	NONCO1333	TSS13162	TCONS_00016408	.
chr1	213031108	213031430	323	-	antisense_upstream	exon	NA	NA	2	m	ENST00000356684	NONCO1333	TSS13162	TCONS_00016408	.
chr1	213029946	213030260	315	-	antisense_upstream	exon	NA	NA	1	m	ENST00000424044	NONCO1333	TSS13162	TCONS_00016410	.
chr1	213031108	213031430	323	-	antisense_upstream	exon	NA	NA	2	m	ENST00000424044	NONCO1333	TSS13162	TCONS_00016410	.
chr1	213029946	213030514	569	-	antisense_upstream	exon	NA	NA	1	m	ENST00000426161	NONCO1333	TSS13162	TCONS_00016411	.
chr1	213031108	213031430	323	-	antisense_upstream	exon	NA	NA	2	m	ENST00000426161	NONCO1333	TSS13162	TCONS_00016411	.
chr1	218517538	218517804	267	-	antisense_upstream	exon	NA	NA	1	m	ENST00000414452	NONCO1336	TSS13228	TCONS_00016494	.
chr1	218518517	218518730	214	-	antisense_upstream	exon	NA	NA	2	m	ENST00000414452	NONCO1336	TSS13228	TCONS_00016494	.
chr1	218518945	218519020	76	-	antisense_upstream	exon	NA	NA	3	m	ENST00000414452	NONCO1336	TSS13228	TCONS_00016494	.
chr1	219086099	219086357	259	-	intergenic	exon	NA	NA	1	m	ENST00000446002	NONCO1338	TSS13231	TCONS_00016496	.
chr1	219088577	219088660	84	-	intergenic	exon	NA	NA	2	m	ENST00000446002	NONCO1338	TSS13231	TCONS_00016496	.
chr1	219089480	219089526	47	-	intergenic	exon	NA	NA	3	m	ENST00000446002	NONCO1338	TSS13231	TCONS_00016496	.
chr1	28436250	28436388	139	+	intergenic	exon	NA	NA	1	m	ENST00000443484	NONCO134	TSS1385	TCONS_00001666	.
chr1	28436714	28436809	96	+	intergenic	exon	NA	NA	2	m	ENST00000443484	NONCO134	TSS1385	TCONS_00001666	.
chr1	219395590	219396529	940	-	intergenic	exon	NA	NA	1	m	ENST00000420237	NONCO1342	TSS13237	TCONS_00016499	r
chr1	219398654	219398839	186	-	intergenic	exon	NA	NA	2	m	ENST00000420237	NONCO1342	TSS13237	TCONS_00016499	r
chr1	219583023	219583609	587	-	intergenic	exon	NA	NA	1	m	ENST00000441790	NONCO1344	TSS13239	TCONS_00016500	.
chr1	219585060	219585283	224	-	intergenic	exon	NA	NA	2	m	ENST00000441790	NONCO1344	TSS13239	TCONS_00016500	.
chr1	219608494	219608755	262	-	intergenic	exon	NA	NA	1	m	ENST00000420762	NONCO1345	TSS13240	TCONS_00016501	.
chr1	219610398	219610515	118	-	intergenic	exon	NA	NA	2	m	ENST00000420762	NONCO1345	TSS13240	TCONS_00016501	.
chr1	219615914	219615984	71	-	intergenic	exon	NA	NA	3	m	ENST00000420762	NONCO1345	TSS13240	TCONS_00016501	.
chr1	220533073	220533267	195	-	intergenic	exon	NA	NA	1	m	ENST00000413159	NONCO1346	TSS13265	TCONS_00016539	.
chr1	220533476	220533525	50	-	intergenic	exon	NA	NA	2	m	ENST00000413159	NONCO1346	TSS13265	TCONS_00016539	.
chr1	220658446	220658782	337	-	intergenic	exon	NA	NA	1	m	ENST00000446169	NONCO1347	TSS13268	TCONS_00016542	.
chr1	220660333	220660385	53	-	intergenic	exon	NA	NA	2	m	ENST00000446169	NONCO1347	TSS13268	TCONS_00016542	.
chr1	28969740	28970029	290	+	antisense_upstream	exon	NA	NA	1	m	ENST00000420776	NONCO135	TSS1415	TCONS_00001712	.
chr1	28974709	28975042	334	+	antisense_upstream	exon	NA	NA	2	m	ENST00000420776	NONCO135	TSS1415	TCONS_00001712	.
chr1	28972603	28972901	299	+	antisense_upstream	exon	NA	NA	1	m	ENST00000427804	NONCO135	TSS1416	TCONS_00001713	.
chr1	28974705	28975093	389	+	antisense_upstream	exon	NA	NA	2	m	ENST00000427804	NONCO135	TSS1416	TCONS_00001713	.
chr1	221503422	221507327	3906	-	intergenic	exon	NA	NA	1	m	ENST00000439004	NONCO1350	TSS13278	TCONS_00016551	r
chr1	221509205	221509638	434	-	intergenic	exon	NA	NA	2	m	ENST00000439004	NONCO1350	TSS13278	TCONS_00016551	r
chr1	221505981	221506416	436	-	intergenic	exon	NA	NA	1	m	ENST00000434398	NONCO1350	TSS13279	TCONS_00016552	r
chr1	221507177	221507327	151	-	intergenic	exon	NA	NA	2	m	ENST00000434398	NONCO1350	TSS13279	TCONS_00016552	r
chr1	221509205	221509262	58	-	intergenic	exon	NA	NA	3	m	ENST00000434398	NONCO1350	TSS13279	TCONS_00016552	r
chr1	222054323	222054626	304	-	intergenic	exon	NA	NA	1	m	ENST00000433576	NONCO1351	TSS13289	TCONS_00016560	.
chr1	222057142	222057230	89	-	intergenic	exon	NA	NA	2	m	ENST00000433576	NONCO1351	TSS13289	TCONS_00016560	.
chr1	222087104	222087200	97	-	intergenic	exon	NA	NA	3	m	ENST00000433576	NONCO1351	TSS13289	TCONS_00016560	.
chr1	222087765	222087873	109	-	intergenic	exon	NA	NA	4	m	ENST00000433576	NONCO1351	TSS13289	TCONS_00016560	.
chr1	222091934	222092054	121	-	intergenic	exon	NA	NA	5	m	ENST00000433576	NONCO1351	TSS13289	TCONS_00016560	.
chr1	222086990	222087200	211	-	intergenic	exon	NA	NA	1	m	ENST00000412445	NONCO1351	TSS13287	TCONS_00016561	.
chr1	222087765	222087873	109	-	intergenic	exon	NA	NA	2	m	ENST00000412445	NONCO1351	TSS13287	TCONS_00016561	.
chr1	222091934	222092054	121	-	intergenic	exon	NA	NA	3	m	ENST00000412445	NONCO1351	TSS13287	TCONS_00016561	.
chr1	222151702	222151865	164	-	intergenic	exon	NA	NA	4	m	ENST00000412445	NONCO1351	TSS13287	TCONS_00016561	.
chr1	222001008	222001098	91	-	intergenic	exon	NA	NA	1	m	ENST00000431729	NONCO1352	TSS13290	TCONS_00016559	.
chr1	222007634	222007688	55	-	intergenic	exon	NA	NA	2	m	ENST00000431729	NONCO1352	TSS13290	TCONS_00016559	.
chr1	222013650	222013795	146	-	intergenic	exon	NA	NA	3	m	ENST00000431729	NONCO1352	TSS13290	TCONS_00016559	.
chr1	222013878	222014008	131	-	intergenic	exon	NA	NA	4	m	ENST00000431729	NONCO1352	TSS13290	TCONS_00016559	.
chr1	222215047	222215264	218	-	intergenic	exon	NA	NA	1	m	ENST00000438158	NONCO1354	TSS13293	TCONS_00016564	.
chr1	222231756	222232020	265	-	intergenic	exon	NA	NA	2	m	ENST00000438158	NONCO1354	TSS13293	TCONS_00016564	.
chr1	222238027	222238105	79	-	intergenic	exon	NA	NA	3	m	ENST00000438158	NONCO1354	TSS13293	TCONS_00016564	.
chr1	222262511	222262907	397	-	intergenic	exon	NA	NA	1	m	ENST00000416510	NONCO1355	TSS13294	TCONS_00016565	.
chr1	222391721	222391831	111	-	intergenic	exon	NA	NA	2	m	ENST00000416510	NONCO1355	TSS13294	TCONS_00016565	.
chr1	222558983	222559034	52	-	intergenic	exon	NA	NA	3	m	ENST00000416510	NONCO1355	TSS13294	TCONS_00016565	.
chr1	222560662	222560776	115	-	intergenic	exon	NA	NA	4	m	ENST00000416510	NONCO1355	TSS13294	TCONS_00016565	.
chr1	222626082	222626241	160	-	intergenic	exon	NA	NA	1	m	ENST00000455363	NONCO1356	TSS13297	TCONS_00016567	r
chr1	222627381	222627490	110	-	intergenic	exon	NA	NA	2	m	ENST00000455363	NONCO1356	TSS13297	TCONS_00016567	r
chr1	222628002	222628047	46	-	intergenic	exon	NA	NA	3	m	ENST00000455363	NONCO1356	TSS13297	TCONS_00016567	r
chr1	224148693	224148934	242	-	intergenic	exon	NA	NA	1	m	Human-IGR39-R1.tophat.35766.1	NONCO1359	TSS13350	TCONS_00016642	.
chr1	224149779	224150269	491	-	intergenic	exon	NA	NA	2	m	Human-IGR39-R1.tophat.35766.1	NONCO1359	TSS13350	TCONS_00016642	.
chr1	224170456	224170544	89	-	intergenic	exon	NA	NA	1	m	ENST00000431663	NONCO1360	TSS13358	TCONS_00016644	.
chr1	224170893	224170987	95	-	intergenic	exon	NA	NA	2	m	ENST00000431663	NONCO1360	TSS13358	TCONS_00016644	.
chr1	224174277	224174342	66	-	intergenic	exon	NA	NA	3	m	ENST00000431663	NONCO1360	TSS13358	TCONS_00016644	.
chr1	224175747	224175856	110	-	intergenic	exon	NA	NA	4	m	ENST00000431663	NONCO1360	TSS13358	TCONS_00016644	.
chr1	224396449	224396713	265	-	intergenic	exon	NA	NA	1	m	ENST00000453760	NONCO1362	TSS13362	TCONS_00016650	r
chr1	224397943	224398114	172	-	intergenic	exon	NA	NA	2	m	ENST00000453760	NONCO1362	TSS13362	TCONS_00016650	r
chr1	224396449	224396713	265	-	intergenic	exon	NA	NA	1	m	ENST00000436706	NONCO1362	TSS13363	TCONS_00016651	r
chr1	224400457	224400981	525	-	intergenic	exon	NA	NA	2	m	ENST00000436706	NONCO1362	TSS13363	TCONS_00016651	r
chr1	224802998	224803129	132	-	antisense_upstream	exon	NA	NA	1	m	ENST00000437416	NONCO1363	TSS13380	TCONS_00016688	.
chr1	224803314	224803438	125	-	antisense_upstream	exon	NA	NA	2	m	ENST00000437416	NONCO1363	TSS13380	TCONS_00016688	.
chr1	224803777	224803922	146	-	antisense_upstream	exon	NA	NA	3	m	ENST00000437416	NONCO1363	TSS13380	TCONS_00016688	.
chr1	225634945	225635220	276	-	intergenic	exon	NA	NA	1	m	ENST00000428642	NONCO1365	TSS13391	TCONS_00016700	.
chr1	225652925	225653045	121	-	intergenic	exon	NA	NA	2	m	ENST00000428642	NONCO1365	TSS13391	TCONS_00016700	.
chr1	225635693	225636287	595	-	intergenic	exon	NA	NA	1	m	ENST00000433058	NONCO1365	TSS13391	TCONS_00016701	.
chr1	225652925	225652985	61	-	intergenic	exon	NA	NA	2	m	ENST00000433058	NONCO1365	TSS13391	TCONS_00016701	.
chr1	225898670	225898922	253	-	intergenic	exon	NA	NA	1	m	ENST00000428148	NONCO1366	TSS13402	TCONS_00016710	r
chr1	225923079	225923197	119	-	intergenic	exon	NA	NA	2	m	ENST00000428148	NONCO1366	TSS13402	TCONS_00016710	r
chr1	225923815	225923976	162	-	intergenic	exon	NA	NA	3	m	ENST00000428148	NONCO1366	TSS13402	TCONS_00016710	r
chr1	227698297	227698388	92	-	intergenic	exon	NA	NA	1	m	ENST00000422837	NONCO1372	TSS13473	TCONS_00016781	.
chr1	227698498	227698669	172	-	intergenic	exon	NA	NA	2	m	ENST00000422837	NONCO1372	TSS13473	TCONS_00016781	.
chr1	227699298	227699391	94	-	intergenic	exon	NA	NA	3	m	ENST00000422837	NONCO1372	TSS13473	TCONS_00016781	.
chr1	227699939	227700069	131	-	intergenic	exon	NA	NA	4	m	ENST00000422837	NONCO1372	TSS13473	TCONS_00016781	.
chr1	227707461	227707510	50	-	intergenic	exon	NA	NA	5	m	ENST00000422837	NONCO1372	TSS13473	TCONS_00016781	.
chr1	227708099	227708178	80	-	intergenic	exon	NA	NA	6	m	ENST00000422837	NONCO1372	TSS13473	TCONS_00016781	.
chr1	227884593	227885127	535	-	intergenic	exon	NA	NA	1	m	ENST00000412638	NONCO1373	TSS13496	TCONS_00016786	.
chr1	227885361	227885635	275	-	intergenic	exon	NA	NA	2	m	ENST00000412638	NONCO1373	TSS13496	TCONS_00016786	.
chr1	227885831	227885904	74	-	intergenic	exon	NA	NA	3	m	ENST00000412638	NONCO1373	TSS13496	TCONS_00016786	.
chr1	227893668	227893717	50	-	intergenic	exon	NA	NA	4	m	ENST00000412638	NONCO1373	TSS13496	TCONS_00016786	.
chr1	227894258	227894400	143	-	intergenic	exon	NA	NA	5	m	ENST00000412638	NONCO1373	TSS13496	TCONS_00016786	.
chr1	227893751	227893818	68	-	intergenic	exon	NA	NA	1	m	ENST00000400949	NONCO1373	TSS13496	TCONS_00016788	.
chr1	227894262	227894412	151	-	intergenic	exon	NA	NA	2	m	ENST00000400949	NONCO1373	TSS13496	TCONS_00016788	.
chr1	228163091	228163207	117	-	intergenic	exon	NA	NA	1	m	ENST00000425003	NONCO1375	TSS13506	TCONS_00016799	.
chr1	228163543	228163980	438	-	intergenic	exon	NA	NA	2	m	ENST00000425003	NONCO1375	TSS13506	TCONS_00016799	.
chr1	228164002	228165894	1893	-	intergenic	exon	NA	NA	3	m	ENST00000425003	NONCO1375	TSS13506	TCONS_00016799	.
chr1	228571815	228572160	346	-	intergenic	exon	NA	NA	1	m	ENST00000602345	NONCO1379	TSS13527	TCONS_00016853	r
chr1	228572490	228572717	228	-	intergenic	exon	NA	NA	2	m	ENST00000602345	NONCO1379	TSS13527	TCONS_00016853	r
chr1	229228562	229229035	474	-	intergenic	exon	NA	NA	1	m	ENST00000433734	NONCO1381	TSS13551	TCONS_00016877	.
chr1	229230528	229230652	125	-	intergenic	exon	NA	NA	2	m	ENST00000433734	NONCO1381	TSS13551	TCONS_00016877	.
chr1	229359208	229359697	490	-	intergenic	exon	NA	NA	1	m	ENST00000430677	NONCO1382	TSS13552	TCONS_00016878	.
chr1	229363008	229363309	302	-	intergenic	exon	NA	NA	2	m	ENST00000430677	NONCO1382	TSS13552	TCONS_00016878	.
chr1	229394028	229394867	840	-	antisense_upstream	exon	NA	NA	1	m	ENST00000429227	NONCO1383	TSS13553	TCONS_00016879	.
chr1	229406723	229406750	28	-	antisense_upstream	exon	NA	NA	2	m	ENST00000429227	NONCO1383	TSS13553	TCONS_00016879	.
chr1	229405113	229405374	262	-	antisense_upstream	exon	NA	NA	1	m	ENST00000436334	NONCO1383	TSS13553	TCONS_00016880	.
chr1	229406723	229406775	53	-	antisense_upstream	exon	NA	NA	2	m	ENST00000436334	NONCO1383	TSS13553	TCONS_00016880	.
chr1	230011297	230011468	172	-	intergenic	exon	NA	NA	1	m	ENST00000435973	NONCO1385	TSS13572	TCONS_00016905	.
chr1	230021287	230021499	213	-	intergenic	exon	NA	NA	2	m	ENST00000435973	NONCO1385	TSS13572	TCONS_00016905	.
chr1	230451438	230451830	393	-	intergenic	exon	NA	NA	1	m	ENST00000366088	NONCO1388	TSS13582	TCONS_00016911	r
chr1	230451836	230451976	141	-	intergenic	exon	NA	NA	2	m	ENST00000366088	NONCO1388	TSS13582	TCONS_00016911	r
chr1	230728406	230728586	181	-	intergenic	exon	NA	NA	1	m	ENST00000412647	NONCO1389	TSS13589	TCONS_00016917	r
chr1	230731108	230731329	222	-	intergenic	exon	NA	NA	2	m	ENST00000412647	NONCO1389	TSS13589	TCONS_00016917	r
chr1	30613110	30613187	78	+	intergenic	exon	NA	NA	1	m	ENST00000441046	NONCO139	TSS1451	TCONS_00001764	r
chr1	30613982	30614454	473	+	intergenic	exon	NA	NA	2	m	ENST00000441046	NONCO139	TSS1451	TCONS_00001764	r
chr1	230959387	230959653	267	-	intergenic	exon	NA	NA	1	m	ENST00000436739	NONCO1391	TSS13594	TCONS_00016923	.
chr1	230960410	230960453	44	-	intergenic	exon	NA	NA	2	m	ENST00000436739	NONCO1391	TSS13594	TCONS_00016923	.
chr1	231658134	231658383	250	-	antisense_upstream	exon	NA	NA	1	m	ENST00000416221	NONCO1393	TSS13627	TCONS_00016963	r
chr1	231663084	231663161	78	-	antisense_upstream	exon	NA	NA	2	m	ENST00000416221	NONCO1393	TSS13627	TCONS_00016963	r
chr1	231664166	231664302	137	-	antisense_upstream	exon	NA	NA	3	m	ENST00000416221	NONCO1393	TSS13627	TCONS_00016963	r
chr1	231658207	231658383	177	-	antisense_upstream	exon	NA	NA	1	m	ENST00000440665	NONCO1393	TSS13628	TCONS_00016964	.
chr1	231663084	231663161	78	-	antisense_upstream	exon	NA	NA	2	m	ENST00000440665	NONCO1393	TSS13628	TCONS_00016964	.
chr1	231663512	231663538	27	-	antisense_upstream	exon	NA	NA	3	m	ENST00000440665	NONCO1393	TSS13628	TCONS_00016964	.
chr1	231663868	231664001	134	-	antisense_upstream	exon	NA	NA	4	m	ENST00000440665	NONCO1393	TSS13628	TCONS_00016964	.
chr1	231658207	231658383	177	-	antisense_upstream	exon	NA	NA	1	m	ENST00000450783	NONCO1393	TSS13628	TCONS_00016965	.
chr1	231663084	231663161	78	-	antisense_upstream	exon	NA	NA	2	m	ENST00000450783	NONCO1393	TSS13628	TCONS_00016965	.
chr1	231663868	231664042	175	-	antisense_upstream	exon	NA	NA	3	m	ENST00000450783	NONCO1393	TSS13628	TCONS_00016965	.
chr1	231658263	231658383	121	-	antisense_upstream	exon	NA	NA	1	m	ENST00000454631	NONCO1393	TSS13627	TCONS_00016966	r
chr1	231660172	231660293	122	-	antisense_upstream	exon	NA	NA	2	m	ENST00000454631	NONCO1393	TSS13627	TCONS_00016966	r
chr1	231663084	231663161	78	-	antisense_upstream	exon	NA	NA	3	m	ENST00000454631	NONCO1393	TSS13627	TCONS_00016966	r
chr1	231664166	231664302	137	-	antisense_upstream	exon	NA	NA	4	m	ENST00000454631	NONCO1393	TSS13627	TCONS_00016966	r
chr1	231662852	231663161	310	-	antisense_upstream	exon	NA	NA	1	m	ENST00000425412	NONCO1393	TSS13629	TCONS_00016967	.
chr1	231664166	231664247	82	-	antisense_upstream	exon	NA	NA	2	m	ENST00000425412	NONCO1393	TSS13629	TCONS_00016967	.
chr1	231727038	231727546	509	-	intergenic	exon	NA	NA	1	m	ENST00000448058	NONCO1394	TSS13630	TCONS_00016968	.
chr1	231747749	231747836	88	-	intergenic	exon	NA	NA	2	m	ENST00000448058	NONCO1394	TSS13630	TCONS_00016968	.
chr1	232310678	232311601	924	-	intergenic	exon	NA	NA	1	m	ENST00000441459	NONCO1395	TSS13632	TCONS_00016970	.
chr1	232314543	232315859	1317	-	intergenic	exon	NA	NA	2	m	ENST00000441459	NONCO1395	TSS13632	TCONS_00016970	.
chr1	232863000	232864435	1436	-	intergenic	exon	NA	NA	1	m	ENST00000457698	NONCO1397	TSS13644	TCONS_00016980	.
chr1	232866321	232866527	207	-	intergenic	exon	NA	NA	2	m	ENST00000457698	NONCO1397	TSS13644	TCONS_00016980	.
chr1	232871447	232871496	50	-	intergenic	exon	NA	NA	3	m	ENST00000457698	NONCO1397	TSS13644	TCONS_00016980	.
chr1	232878113	232878461	349	-	intergenic	exon	NA	NA	4	m	ENST00000457698	NONCO1397	TSS13644	TCONS_00016980	.
chr1	846815	846853	39	+	intergenic	exon	NA	NA	1	m	ENST00000448179	NONCO14	TSS69	TCONS_00000082	.
chr1	847325	850328	3004	+	intergenic	exon	NA	NA	2	m	ENST00000448179	NONCO14	TSS69	TCONS_00000082	.
chr1	849551	849824	274	+	intergenic	exon	NA	NA	1	m	ENST00000398216	NONCO14	TSS71	TCONS_00000083	.
chr1	850183	850351	169	+	intergenic	exon	NA	NA	2	m	ENST00000398216	NONCO14	TSS71	TCONS_00000083	.
chr1	30888672	30888720	49	+	intergenic	exon	NA	NA	1	m	ENST00000420354	NONCO140	TSS1453	TCONS_00001766	.
chr1	30889694	30889800	107	+	intergenic	exon	NA	NA	2	m	ENST00000420354	NONCO140	TSS1453	TCONS_00001766	.
chr1	30893631	30893955	325	+	intergenic	exon	NA	NA	3	m	ENST00000420354	NONCO140	TSS1453	TCONS_00001766	.
chr1	234663637	234666088	2452	-	intergenic	exon	NA	NA	1	m	ENST00000435574	NONCO1402	TSS13690	TCONS_00017024	.
chr1	234666772	234666927	156	-	intergenic	exon	NA	NA	2	m	ENST00000435574	NONCO1402	TSS13690	TCONS_00017024	.
chr1	234667274	234667525	252	-	intergenic	exon	NA	NA	3	m	ENST00000435574	NONCO1402	TSS13690	TCONS_00017024	.
chr1	234665688	234666088	401	-	intergenic	exon	NA	NA	1	m	ENST00000421207	NONCO1402	TSS13690	TCONS_00017025	.
chr1	234666762	234666927	166	-	intergenic	exon	NA	NA	2	m	ENST00000421207	NONCO1402	TSS13690	TCONS_00017025	.
chr1	234667274	234667511	238	-	intergenic	exon	NA	NA	3	m	ENST00000421207	NONCO1402	TSS13690	TCONS_00017025	.
chr1	234805269	234808736	3468	-	intergenic	exon	NA	NA	1	m	ENST00000442382	NONCO1403	TSS13693	TCONS_00017029	.
chr1	234831805	234831900	96	-	intergenic	exon	NA	NA	2	m	ENST00000442382	NONCO1403	TSS13693	TCONS_00017029	.
chr1	235093089	235093268	180	-	intergenic	exon	NA	NA	1	m	ENST00000418557	NONCO1405	TSS13695	TCONS_00017030	.
chr1	235093426	235093825	400	-	intergenic	exon	NA	NA	2	m	ENST00000418557	NONCO1405	TSS13695	TCONS_00017030	.
chr1	235095588	235095663	76	-	intergenic	exon	NA	NA	3	m	ENST00000418557	NONCO1405	TSS13695	TCONS_00017030	.
chr1	235099514	235099746	233	-	intergenic	exon	NA	NA	4	m	ENST00000418557	NONCO1405	TSS13695	TCONS_00017030	.
chr1	235095408	235095663	256	-	intergenic	exon	NA	NA	1	m	ENST00000423988	NONCO1405	TSS13697	TCONS_00017031	.
chr1	235099514	235099574	61	-	intergenic	exon	NA	NA	2	m	ENST00000423988	NONCO1405	TSS13697	TCONS_00017031	.
chr1	235095410	235095663	254	-	intergenic	exon	NA	NA	1	m	ENST00000423175	NONCO1405	TSS13700	TCONS_00017032	.
chr1	235097164	235097313	150	-	intergenic	exon	NA	NA	2	m	ENST00000423175	NONCO1405	TSS13700	TCONS_00017032	.
chr1	235098786	235098935	150	-	intergenic	exon	NA	NA	3	m	ENST00000423175	NONCO1405	TSS13700	TCONS_00017032	.
chr1	235095413	235095663	251	-	intergenic	exon	NA	NA	1	m	ENST00000451766	NONCO1405	TSS13696	TCONS_00017033	.
chr1	235104135	235104237	103	-	intergenic	exon	NA	NA	2	m	ENST00000451766	NONCO1405	TSS13696	TCONS_00017033	.
chr1	235105737	235105809	73	-	intergenic	exon	NA	NA	3	m	ENST00000451766	NONCO1405	TSS13696	TCONS_00017033	.
chr1	235097123	235097313	191	-	intergenic	exon	NA	NA	1	m	ENST00000458044	NONCO1405	TSS13700	TCONS_00017034	.
chr1	235098706	235098873	168	-	intergenic	exon	NA	NA	2	m	ENST00000458044	NONCO1405	TSS13700	TCONS_00017034	.
chr1	235115394	235116090	697	-	intergenic	exon	NA	NA	1	m	ENST00000549744	NONCO1406	TSS13701	TCONS_00017035	.
chr1	235116403	235116551	149	-	intergenic	exon	NA	NA	2	m	ENST00000549744	NONCO1406	TSS13701	TCONS_00017035	.
chr1	238271036	238271192	157	-	intergenic	exon	NA	NA	1	m	ENST00000445891	NONCO1413	TSS13774	TCONS_00017127	.
chr1	238271513	238271867	355	-	intergenic	exon	NA	NA	2	m	ENST00000445891	NONCO1413	TSS13774	TCONS_00017127	.
chr1	238643684	238644981	1298	-	intergenic	exon	NA	NA	1	m	ENST00000400946	NONCO1414	TSS13776	TCONS_00017129	r
chr1	238649085	238649323	239	-	intergenic	exon	NA	NA	2	m	ENST00000400946	NONCO1414	TSS13776	TCONS_00017129	r
chr1	238940349	238942020	1672	-	intergenic	exon	NA	NA	1	m	ENST00000422560	NONCO1415	TSS13777	TCONS_00017130	.
chr1	238942354	238942500	147	-	intergenic	exon	NA	NA	2	m	ENST00000422560	NONCO1415	TSS13777	TCONS_00017130	.
chr1	239433025	239433445	421	-	intergenic	exon	NA	NA	1	m	ENST00000442410	NONCO1416	TSS13780	TCONS_00017133	r
chr1	239439753	239439761	9	-	intergenic	exon	NA	NA	2	m	ENST00000442410	NONCO1416	TSS13780	TCONS_00017133	r
chr1	31297075	31297220	146	+	intergenic	exon	NA	NA	1	m	ENST00000430320	NONCO142	TSS1458	TCONS_00001773	.
chr1	31299452	31299499	48	+	intergenic	exon	NA	NA	2	m	ENST00000430320	NONCO142	TSS1458	TCONS_00001773	.
chr1	31302595	31302729	135	+	intergenic	exon	NA	NA	3	m	ENST00000430320	NONCO142	TSS1458	TCONS_00001773	.
chr1	31306353	31307131	779	+	intergenic	exon	NA	NA	4	m	ENST00000430320	NONCO142	TSS1458	TCONS_00001773	.
chr1	31297522	31297675	154	+	intergenic	exon	NA	NA	1	m	ENST00000438790	NONCO142	TSS1459	TCONS_00001774	.
chr1	31298978	31299041	64	+	intergenic	exon	NA	NA	2	m	ENST00000438790	NONCO142	TSS1459	TCONS_00001774	.
chr1	31306353	31306580	228	+	intergenic	exon	NA	NA	3	m	ENST00000438790	NONCO142	TSS1459	TCONS_00001774	.
chr1	240902719	240903153	435	-	intergenic	exon	NA	NA	1	m	ENST00000431139	NONCO1426	TSS13801	TCONS_00017152	.
chr1	240906891	240906911	21	-	intergenic	exon	NA	NA	2	m	ENST00000431139	NONCO1426	TSS13801	TCONS_00017152	.
chr1	243169147	243169576	430	-	intergenic	exon	NA	NA	1	m	ENST00000427176	NONCO1428	TSS13829	TCONS_00017189	.
chr1	243169714	243169980	267	-	intergenic	exon	NA	NA	2	m	ENST00000427176	NONCO1428	TSS13829	TCONS_00017189	.
chr1	243170676	243170770	95	-	intergenic	exon	NA	NA	3	m	ENST00000427176	NONCO1428	TSS13829	TCONS_00017189	.
chr1	243192814	243193218	405	-	intergenic	exon	NA	NA	1	m	ENST00000436756	NONCO1429	TSS13830	TCONS_00017190	.
chr1	243194574	243194678	105	-	intergenic	exon	NA	NA	2	m	ENST00000436756	NONCO1429	TSS13830	TCONS_00017190	.
chr1	243211014	243211127	114	-	intergenic	exon	NA	NA	3	m	ENST00000436756	NONCO1429	TSS13830	TCONS_00017190	.
chr1	243194574	243194678	105	-	intergenic	exon	NA	NA	1	m	ENST00000420830	NONCO1429	TSS13830	TCONS_00017191	.
chr1	243202583	243202794	212	-	intergenic	exon	NA	NA	2	m	ENST00000420830	NONCO1429	TSS13830	TCONS_00017191	.
chr1	243211014	243211171	158	-	intergenic	exon	NA	NA	3	m	ENST00000420830	NONCO1429	TSS13830	TCONS_00017191	.
chr1	243202216	243202794	579	-	intergenic	exon	NA	NA	1	m	ENST00000450226	NONCO1429	TSS13831	TCONS_00017192	.
chr1	243211014	243211177	164	-	intergenic	exon	NA	NA	2	m	ENST00000450226	NONCO1429	TSS13831	TCONS_00017192	.
chr1	243211747	243211826	80	-	intergenic	exon	NA	NA	3	m	ENST00000450226	NONCO1429	TSS13831	TCONS_00017192	.
chr1	243211039	243211177	139	-	intergenic	exon	NA	NA	1	m	ENST00000437691	NONCO1429	TSS13832	TCONS_00017193	.
chr1	243215348	243215554	207	-	intergenic	exon	NA	NA	2	m	ENST00000437691	NONCO1429	TSS13832	TCONS_00017193	.
chr1	31331005	31331213	209	+	intergenic	exon	NA	NA	1	m	ENST00000431202	NONCO143	TSS1460	TCONS_00001775	.
chr1	31331564	31333101	1538	+	intergenic	exon	NA	NA	2	m	ENST00000431202	NONCO143	TSS1460	TCONS_00001775	.
chr1	243242290	243242354	65	-	intergenic	exon	NA	NA	1	m	ENST00000427210	NONCO1430	TSS13835	TCONS_00017195	.
chr1	243245192	243245427	236	-	intergenic	exon	NA	NA	2	m	ENST00000427210	NONCO1430	TSS13835	TCONS_00017195	.
chr1	243252623	243252681	59	-	intergenic	exon	NA	NA	3	m	ENST00000427210	NONCO1430	TSS13835	TCONS_00017195	.
chr1	243254692	243254816	125	-	intergenic	exon	NA	NA	4	m	ENST00000427210	NONCO1430	TSS13835	TCONS_00017195	.
chr1	243251337	243251534	198	-	intergenic	exon	NA	NA	1	m	ENST00000433986	NONCO1430	TSS13836	TCONS_00017196	r
chr1	243252623	243252681	59	-	intergenic	exon	NA	NA	2	m	ENST00000433986	NONCO1430	TSS13836	TCONS_00017196	r
chr1	243254833	243254898	66	-	intergenic	exon	NA	NA	3	m	ENST00000433986	NONCO1430	TSS13836	TCONS_00017196	r
chr1	243255781	243255900	120	-	intergenic	exon	NA	NA	4	m	ENST00000433986	NONCO1430	TSS13836	TCONS_00017196	r
chr1	243251430	243251534	105	-	intergenic	exon	NA	NA	1	m	ENST00000417964	NONCO1430	TSS13837	TCONS_00017197	.
chr1	243252623	243252681	59	-	intergenic	exon	NA	NA	2	m	ENST00000417964	NONCO1430	TSS13837	TCONS_00017197	.
chr1	243254833	243254898	66	-	intergenic	exon	NA	NA	3	m	ENST00000417964	NONCO1430	TSS13837	TCONS_00017197	.
chr1	243260492	243260601	110	-	intergenic	exon	NA	NA	4	m	ENST00000417964	NONCO1430	TSS13837	TCONS_00017197	.
chr1	243264688	243265020	333	-	intergenic	exon	NA	NA	5	m	ENST00000417964	NONCO1430	TSS13837	TCONS_00017197	.
chr1	243254693	243254898	206	-	intergenic	exon	NA	NA	1	m	ENST00000415989	NONCO1430	TSS13836	TCONS_00017198	.
chr1	243255781	243255892	112	-	intergenic	exon	NA	NA	2	m	ENST00000415989	NONCO1430	TSS13836	TCONS_00017198	.
chr1	243254768	243254898	131	-	intergenic	exon	NA	NA	1	m	ENST00000431528	NONCO1430	TSS13836	TCONS_00017199	r
chr1	243255343	243255496	154	-	intergenic	exon	NA	NA	2	m	ENST00000431528	NONCO1430	TSS13836	TCONS_00017199	r
chr1	243255781	243255860	80	-	intergenic	exon	NA	NA	3	m	ENST00000431528	NONCO1430	TSS13836	TCONS_00017199	r
chr1	243259293	243259424	132	-	intergenic	exon	NA	NA	1	m	ENST00000411733	NONCO1430	TSS13838	TCONS_00017200	.
chr1	243260492	243260889	398	-	intergenic	exon	NA	NA	2	m	ENST00000411733	NONCO1430	TSS13838	TCONS_00017200	.
chr1	243260176	243260601	426	-	intergenic	exon	NA	NA	1	m	ENST00000435793	NONCO1430	TSS13837	TCONS_00017201	.
chr1	243264688	243265035	348	-	intergenic	exon	NA	NA	2	m	ENST00000435793	NONCO1430	TSS13837	TCONS_00017201	.
chr1	244232122	244232229	108	-	antisense_downstream	exon	NA	NA	1	m	ENST00000441338	NONCO1435	TSS13875	TCONS_00017240	.
chr1	244237133	244237332	200	-	antisense_downstream	exon	NA	NA	2	m	ENST00000441338	NONCO1435	TSS13875	TCONS_00017240	.
chr1	244238582	244238667	86	-	antisense_downstream	exon	NA	NA	3	m	ENST00000441338	NONCO1435	TSS13875	TCONS_00017240	.
chr1	244254891	244254927	37	-	antisense_downstream	exon	NA	NA	4	m	ENST00000441338	NONCO1435	TSS13875	TCONS_00017240	.
chr1	244256292	244256328	37	-	antisense_downstream	exon	NA	NA	5	m	ENST00000441338	NONCO1435	TSS13875	TCONS_00017240	.
chr1	31627904	31627999	96	+	intergenic	exon	NA	NA	1	m	Human-IGR39-R1.tophat.8748.1	NONCO144	TSS1484	TCONS_00001778	r
chr1	31628572	31628888	317	+	intergenic	exon	NA	NA	2	m	Human-IGR39-R1.tophat.8748.1	NONCO144	TSS1484	TCONS_00001778	r
chr1	31627940	31627999	60	+	intergenic	exon	NA	NA	1	m	Human-IGR39-R1.tophat.8748.2	NONCO144	TSS1484	TCONS_00001779	r
chr1	31628570	31628888	319	+	intergenic	exon	NA	NA	2	m	Human-IGR39-R1.tophat.8748.2	NONCO144	TSS1484	TCONS_00001779	r
chr1	247248691	247248751	61	-	intergenic	exon	NA	NA	1	m	ENST00000414775	NONCO1444	TSS13943	TCONS_00017315	.
chr1	247249110	247249369	260	-	intergenic	exon	NA	NA	2	m	ENST00000414775	NONCO1444	TSS13943	TCONS_00017315	.
chr1	248647546	248648196	651	-	antisense_upstream	exon	NA	NA	1	m	ENST00000450847	NONCO1448	TSS14003	TCONS_00017363	.
chr1	248648470	248648785	316	-	antisense_upstream	exon	NA	NA	2	m	ENST00000450847	NONCO1448	TSS14003	TCONS_00017363	.
chr1	248881947	248882108	162	-	intergenic	exon	NA	NA	1	m	ENST00000436484	NONCO1449	TSS14012	TCONS_00017372	.
chr1	248884571	248885506	936	-	intergenic	exon	NA	NA	2	m	ENST00000436484	NONCO1449	TSS14012	TCONS_00017372	.
chr1	31971841	31972007	167	+	intergenic	exon	NA	NA	1	m	ENST00000418618	NONCO145	TSS1492	TCONS_00001791	.
chr1	31973035	31973182	148	+	intergenic	exon	NA	NA	2	m	ENST00000418618	NONCO145	TSS1492	TCONS_00001791	.
chr1	31973317	31974167	851	+	intergenic	exon	NA	NA	3	m	ENST00000418618	NONCO145	TSS1492	TCONS_00001791	.
chr1	31984036	31984437	402	+	intergenic	exon	NA	NA	1	m	ENST00000412068	NONCO146	TSS1493	TCONS_00001792	.
chr1	31986547	31986664	118	+	intergenic	exon	NA	NA	2	m	ENST00000412068	NONCO146	TSS1493	TCONS_00001792	.
chr1	31987626	31989846	2221	+	intergenic	exon	NA	NA	3	m	ENST00000412068	NONCO146	TSS1493	TCONS_00001792	.
chr1	31987964	31988326	363	+	intergenic	exon	NA	NA	1	m	ENST00000417514	NONCO146	TSS1494	TCONS_00001793	.
chr1	31988432	31989190	759	+	intergenic	exon	NA	NA	2	m	ENST00000417514	NONCO146	TSS1494	TCONS_00001793	.
chr1	35316295	35316750	456	+	antisense_downstream	exon	NA	NA	1	m	ENST00000429293	NONCO157	TSS1654	TCONS_00002030	.
chr1	35316893	35317156	264	+	antisense_downstream	exon	NA	NA	2	m	ENST00000429293	NONCO157	TSS1654	TCONS_00002030	.
chr1	37238741	37238914	174	+	intergenic	exon	NA	NA	1	m	ENST00000451375	NONCO167	TSS1757	TCONS_00002130	.
chr1	37241081	37241369	289	+	intergenic	exon	NA	NA	2	m	ENST00000451375	NONCO167	TSS1757	TCONS_00002130	.
chr1	38513097	38513286	190	+	antisense_upstream	exon	NA	NA	1	m	ENST00000428151	NONCO169	TSS1807	TCONS_00002177	.
chr1	38568089	38568168	80	+	antisense_upstream	exon	NA	NA	2	m	ENST00000428151	NONCO169	TSS1807	TCONS_00002177	.
chr1	38569218	38569333	116	+	antisense_upstream	exon	NA	NA	3	m	ENST00000428151	NONCO169	TSS1807	TCONS_00002177	.
chr1	38571304	38571424	121	+	antisense_upstream	exon	NA	NA	4	m	ENST00000428151	NONCO169	TSS1807	TCONS_00002177	.
chr1	38584632	38584697	66	+	antisense_upstream	exon	NA	NA	5	m	ENST00000428151	NONCO169	TSS1807	TCONS_00002177	.
chr1	1072397	1072490	94	+	intergenic	exon	NA	NA	1	m	ENST00000416774	NONCO17	TSS107	TCONS_00000120	.
chr1	1076205	1076412	208	+	intergenic	exon	NA	NA	2	m	ENST00000416774	NONCO17	TSS107	TCONS_00000120	.
chr1	1078119	1079436	1318	+	intergenic	exon	NA	NA	3	m	ENST00000416774	NONCO17	TSS107	TCONS_00000120	.
chr1	38940868	38941496	629	+	intergenic	exon	NA	NA	1	m	ENST00000452971	NONCO170	TSS1810	TCONS_00002180	.
chr1	38941865	38941927	63	+	intergenic	exon	NA	NA	2	m	ENST00000452971	NONCO170	TSS1810	TCONS_00002180	.
chr1	38942059	38942156	98	+	intergenic	exon	NA	NA	3	m	ENST00000452971	NONCO170	TSS1810	TCONS_00002180	.
chr1	41329586	41329624	39	+	antisense_upstream	exon	NA	NA	1	m	ENST00000414199	NONCO178	TSS1947	TCONS_00002367	r
chr1	41329840	41330067	228	+	antisense_upstream	exon	NA	NA	2	m	ENST00000414199	NONCO178	TSS1947	TCONS_00002367	r
chr1	41342139	41342342	204	+	antisense_upstream	exon	NA	NA	3	m	ENST00000414199	NONCO178	TSS1947	TCONS_00002367	r
chr1	41708045	41708378	334	+	antisense_upstream	exon	NA	NA	1	m	ENST00000425554	NONCO180	TSS1967	TCONS_00002384	.
chr1	41726415	41726545	131	+	antisense_upstream	exon	NA	NA	2	m	ENST00000425554	NONCO180	TSS1967	TCONS_00002384	.
chr1	41730073	41730230	158	+	antisense_upstream	exon	NA	NA	3	m	ENST00000425554	NONCO180	TSS1967	TCONS_00002384	.
chr1	41708247	41708378	132	+	antisense_upstream	exon	NA	NA	1	m	ENST00000445073	NONCO180	TSS1968	TCONS_00002385	.
chr1	41749957	41750533	577	+	antisense_upstream	exon	NA	NA	2	m	ENST00000445073	NONCO180	TSS1968	TCONS_00002385	.
chr1	41726453	41726545	93	+	antisense_upstream	exon	NA	NA	1	m	ENST00000422305	NONCO180	TSS1971	TCONS_00002388	.
chr1	41729513	41729780	268	+	antisense_upstream	exon	NA	NA	2	m	ENST00000422305	NONCO180	TSS1971	TCONS_00002388	.
chr1	41730073	41730225	153	+	antisense_upstream	exon	NA	NA	3	m	ENST00000422305	NONCO180	TSS1971	TCONS_00002388	.
chr1	42606306	42606366	61	+	intergenic	exon	NA	NA	1	m	ENST00000434936	NONCO184	TSS2080	TCONS_00002406	.
chr1	42606670	42607062	393	+	intergenic	exon	NA	NA	2	m	ENST00000434936	NONCO184	TSS2080	TCONS_00002406	.
chr1	43424720	43425248	529	+	antisense_upstream	exon	NA	NA	1	m	ENST00000431759	NONCO187	TSS2131	TCONS_00002470	.
chr1	43435920	43436065	146	+	antisense_upstream	exon	NA	NA	2	m	ENST00000431759	NONCO187	TSS2131	TCONS_00002470	.
chr1	43439645	43439859	215	+	antisense_upstream	exon	NA	NA	3	m	ENST00000431759	NONCO187	TSS2131	TCONS_00002470	.
chr1	43448796	43449029	234	+	antisense_upstream	exon	NA	NA	4	m	ENST00000431759	NONCO187	TSS2131	TCONS_00002470	.
chr1	43424775	43425248	474	+	antisense_upstream	exon	NA	NA	1	m	ENST00000416689	NONCO187	TSS2131	TCONS_00002471	r
chr1	43435920	43436065	146	+	antisense_upstream	exon	NA	NA	2	m	ENST00000416689	NONCO187	TSS2131	TCONS_00002471	r
chr1	43439645	43442099	2455	+	antisense_upstream	exon	NA	NA	3	m	ENST00000416689	NONCO187	TSS2131	TCONS_00002471	r
chr1	45996599	45996712	114	+	intergenic	exon	NA	NA	1	m	ENST00000446155	NONCO193	TSS2317	TCONS_00002779	.
chr1	45997019	45997318	300	+	intergenic	exon	NA	NA	2	m	ENST00000446155	NONCO193	TSS2317	TCONS_00002779	.
chr1	45997628	45997811	184	+	intergenic	exon	NA	NA	3	m	ENST00000446155	NONCO193	TSS2317	TCONS_00002779	.
chr1	46897801	46897914	114	+	intergenic	exon	NA	NA	1	m	ENST00000446499	NONCO196	TSS2381	TCONS_00002882	.
chr1	46898162	46898282	121	+	intergenic	exon	NA	NA	2	m	ENST00000446499	NONCO196	TSS2381	TCONS_00002882	.
chr1	46898696	46898771	76	+	intergenic	exon	NA	NA	3	m	ENST00000446499	NONCO196	TSS2381	TCONS_00002882	.
chr1	46899410	46899623	214	+	intergenic	exon	NA	NA	4	m	ENST00000446499	NONCO196	TSS2381	TCONS_00002882	.
chr1	46901579	46901708	130	+	intergenic	exon	NA	NA	5	m	ENST00000446499	NONCO196	TSS2381	TCONS_00002882	.
chr1	46903052	46903163	112	+	intergenic	exon	NA	NA	6	m	ENST00000446499	NONCO196	TSS2381	TCONS_00002882	.
chr1	46903937	46904018	82	+	intergenic	exon	NA	NA	7	m	ENST00000446499	NONCO196	TSS2381	TCONS_00002882	.
chr1	46904339	46904354	16	+	intergenic	exon	NA	NA	8	m	ENST00000446499	NONCO196	TSS2381	TCONS_00002882	.
chr1	46906334	46906373	40	+	intergenic	exon	NA	NA	9	m	ENST00000446499	NONCO196	TSS2381	TCONS_00002882	.
chr1	46906769	46906874	106	+	intergenic	exon	NA	NA	10	m	ENST00000446499	NONCO196	TSS2381	TCONS_00002882	.
chr1	46908572	46908692	121	+	intergenic	exon	NA	NA	11	m	ENST00000446499	NONCO196	TSS2381	TCONS_00002882	.
chr1	46910888	46910993	106	+	intergenic	exon	NA	NA	12	m	ENST00000446499	NONCO196	TSS2381	TCONS_00002882	.
chr1	46899499	46899619	121	+	intergenic	exon	NA	NA	1	m	ENST00000606395	NONCO196	TSS2382	TCONS_00002884	.
chr1	46900879	46900920	42	+	intergenic	exon	NA	NA	2	m	ENST00000606395	NONCO196	TSS2382	TCONS_00002884	.
chr1	46901584	46901708	125	+	intergenic	exon	NA	NA	3	m	ENST00000606395	NONCO196	TSS2382	TCONS_00002884	.
chr1	46901796	46902125	330	+	intergenic	exon	NA	NA	4	m	ENST00000606395	NONCO196	TSS2382	TCONS_00002884	.
chr1	46901605	46901708	104	+	intergenic	exon	NA	NA	1	m	ENST00000607656	NONCO196	TSS2383	TCONS_00002885	.
chr1	46901796	46901920	125	+	intergenic	exon	NA	NA	2	m	ENST00000607656	NONCO196	TSS2383	TCONS_00002885	.
chr1	46906338	46906377	40	+	intergenic	exon	NA	NA	3	m	ENST00000607656	NONCO196	TSS2383	TCONS_00002885	.
chr1	46906766	46906874	109	+	intergenic	exon	NA	NA	4	m	ENST00000607656	NONCO196	TSS2383	TCONS_00002885	.
chr1	46901817	46901920	104	+	intergenic	exon	NA	NA	1	m	ENST00000429784	NONCO196	TSS2384	TCONS_00002886	.
chr1	46905195	46905249	55	+	intergenic	exon	NA	NA	2	m	ENST00000429784	NONCO196	TSS2384	TCONS_00002886	.
chr1	46906338	46906377	40	+	intergenic	exon	NA	NA	3	m	ENST00000429784	NONCO196	TSS2384	TCONS_00002886	.
chr1	46906766	46906874	109	+	intergenic	exon	NA	NA	4	m	ENST00000429784	NONCO196	TSS2384	TCONS_00002886	.
chr1	46908564	46908709	146	+	intergenic	exon	NA	NA	5	m	ENST00000429784	NONCO196	TSS2384	TCONS_00002886	.
chr1	46910871	46911193	323	+	intergenic	exon	NA	NA	6	m	ENST00000429784	NONCO196	TSS2384	TCONS_00002886	.
chr1	29554	30039	486	+	intergenic	exon	NA	NA	1	m	ENST00000473358	NONCO2	TSS4	TCONS_00000005	.
chr1	30564	30667	104	+	intergenic	exon	NA	NA	2	m	ENST00000473358	NONCO2	TSS4	TCONS_00000005	.
chr1	30976	31097	122	+	intergenic	exon	NA	NA	3	m	ENST00000473358	NONCO2	TSS4	TCONS_00000005	.
chr1	30267	30667	401	+	intergenic	exon	NA	NA	1	m	ENST00000469289	NONCO2	TSS5	TCONS_00000006	r
chr1	30976	31109	134	+	intergenic	exon	NA	NA	2	m	ENST00000469289	NONCO2	TSS5	TCONS_00000006	r
chr1	47223550	47223604	55	+	intergenic	exon	NA	NA	1	m	ENST00000413093	NONCO200	TSS2400	TCONS_00002903	r
chr1	47230650	47230773	124	+	intergenic	exon	NA	NA	2	m	ENST00000413093	NONCO200	TSS2400	TCONS_00002903	r
chr1	47231357	47231515	159	+	intergenic	exon	NA	NA	3	m	ENST00000413093	NONCO200	TSS2400	TCONS_00002903	r
chr1	47233197	47233316	120	+	intergenic	exon	NA	NA	4	m	ENST00000413093	NONCO200	TSS2400	TCONS_00002903	r
chr1	47256076	47256171	96	+	intergenic	exon	NA	NA	5	m	ENST00000413093	NONCO200	TSS2400	TCONS_00002903	r
chr1	47644922	47645110	189	+	antisense_downstream	exon	NA	NA	1	m	ENST00000429328	NONCO201	TSS2416	TCONS_00002926	.
chr1	47645540	47646011	472	+	antisense_downstream	exon	NA	NA	2	m	ENST00000429328	NONCO201	TSS2416	TCONS_00002926	.
chr1	48015868	48016004	137	+	intergenic	exon	NA	NA	1	m	ENST00000427294	NONCO203	TSS2443	TCONS_00002943	.
chr1	48016321	48016425	105	+	intergenic	exon	NA	NA	2	m	ENST00000427294	NONCO203	TSS2443	TCONS_00002943	.
chr1	48154135	48154254	120	+	intergenic	exon	NA	NA	1	m	ENST00000454285	NONCO204	TSS2444	TCONS_00002944	.
chr1	48159867	48159906	40	+	intergenic	exon	NA	NA	2	m	ENST00000454285	NONCO204	TSS2444	TCONS_00002944	.
chr1	48168401	48169055	655	+	intergenic	exon	NA	NA	3	m	ENST00000454285	NONCO204	TSS2444	TCONS_00002944	.
chr1	48519217	48519419	203	+	intergenic	exon	NA	NA	1	m	ENST00000456803	NONCO206	TSS2446	TCONS_00002946	.
chr1	48519883	48519938	56	+	intergenic	exon	NA	NA	2	m	ENST00000456803	NONCO206	TSS2446	TCONS_00002946	.
chr1	48520742	48520868	127	+	intergenic	exon	NA	NA	3	m	ENST00000456803	NONCO206	TSS2446	TCONS_00002946	.
chr1	48522322	48522448	127	+	intergenic	exon	NA	NA	4	m	ENST00000456803	NONCO206	TSS2446	TCONS_00002946	.
chr1	48519881	48519938	58	+	intergenic	exon	NA	NA	1	m	ENST00000439795	NONCO206	TSS2447	TCONS_00002947	.
chr1	48520742	48520868	127	+	intergenic	exon	NA	NA	2	m	ENST00000439795	NONCO206	TSS2447	TCONS_00002947	.
chr1	48532270	48532873	604	+	intergenic	exon	NA	NA	3	m	ENST00000439795	NONCO206	TSS2447	TCONS_00002947	.
chr1	48671637	48671723	87	+	intergenic	exon	NA	NA	1	m	ENST00000431986	NONCO207	TSS2450	TCONS_00002950	.
chr1	48671818	48671966	149	+	intergenic	exon	NA	NA	2	m	ENST00000431986	NONCO207	TSS2450	TCONS_00002950	.
chr1	48672482	48672515	34	+	intergenic	exon	NA	NA	3	m	ENST00000431986	NONCO207	TSS2450	TCONS_00002950	.
chr1	53793905	53794047	143	+	antisense_upstream	exon	NA	NA	1	m	ENST00000445039	NONCO224	TSS2613	TCONS_00003125	r
chr1	53796840	53796923	84	+	antisense_upstream	exon	NA	NA	2	m	ENST00000445039	NONCO224	TSS2613	TCONS_00003125	r
chr1	53801842	53802181	340	+	antisense_upstream	exon	NA	NA	3	m	ENST00000445039	NONCO224	TSS2613	TCONS_00003125	r
chr1	54881929	54881955	27	+	antisense_upstream	exon	NA	NA	1	m	ENST00000447150	NONCO226	TSS2640	TCONS_00003168	.
chr1	54886272	54886533	262	+	antisense_upstream	exon	NA	NA	2	m	ENST00000447150	NONCO226	TSS2640	TCONS_00003168	.
chr1	55683534	55683605	72	+	antisense_upstream	exon	NA	NA	1	m	ENST00000451250	NONCO231	TSS2676	TCONS_00003217	.
chr1	55699285	55699850	566	+	antisense_upstream	exon	NA	NA	2	m	ENST00000451250	NONCO231	TSS2676	TCONS_00003217	.
chr1	56289480	56289574	95	+	intergenic	exon	NA	NA	1	m	ENST00000424357	NONCO232	TSS2683	TCONS_00003224	r
chr1	56297937	56298098	162	+	intergenic	exon	NA	NA	2	m	ENST00000424357	NONCO232	TSS2683	TCONS_00003224	r
chr1	56313102	56313210	109	+	intergenic	exon	NA	NA	3	m	ENST00000424357	NONCO232	TSS2683	TCONS_00003224	r
chr1	56328605	56328732	128	+	intergenic	exon	NA	NA	4	m	ENST00000424357	NONCO232	TSS2683	TCONS_00003224	r
chr1	56333771	56333921	151	+	intergenic	exon	NA	NA	5	m	ENST00000424357	NONCO232	TSS2683	TCONS_00003224	r
chr1	56410760	56410925	166	+	intergenic	exon	NA	NA	1	m	ENST00000455010	NONCO233	TSS2684	TCONS_00003225	r
chr1	56415506	56415792	287	+	intergenic	exon	NA	NA	2	m	ENST00000455010	NONCO233	TSS2684	TCONS_00003225	r
chr1	56611393	56611553	161	+	intergenic	exon	NA	NA	1	m	ENST00000435828	NONCO234	TSS2685	TCONS_00003226	.
chr1	56616673	56616943	271	+	intergenic	exon	NA	NA	2	m	ENST00000435828	NONCO234	TSS2685	TCONS_00003226	.
chr1	56620598	56620896	299	+	intergenic	exon	NA	NA	3	m	ENST00000435828	NONCO234	TSS2685	TCONS_00003226	.
chr1	56880635	56880822	188	+	intergenic	exon	NA	NA	1	m	ENST00000451914	NONCO235	TSS2686	TCONS_00003227	r
chr1	56880920	56881014	95	+	intergenic	exon	NA	NA	2	m	ENST00000451914	NONCO235	TSS2686	TCONS_00003227	r
chr1	56881205	56881281	77	+	intergenic	exon	NA	NA	3	m	ENST00000451914	NONCO235	TSS2686	TCONS_00003227	r
chr1	56881454	56881638	185	+	intergenic	exon	NA	NA	4	m	ENST00000451914	NONCO235	TSS2686	TCONS_00003227	r
chr1	59250823	59250977	155	+	antisense_upstream	exon	NA	NA	1	m	ENST00000544621	NONCO242	TSS2705	TCONS_00003261	.
chr1	59359217	59359389	173	+	antisense_upstream	exon	NA	NA	2	m	ENST00000544621	NONCO242	TSS2705	TCONS_00003261	.
chr1	59364719	59365384	666	+	antisense_upstream	exon	NA	NA	3	m	ENST00000544621	NONCO242	TSS2705	TCONS_00003261	.
chr1	59250832	59250977	146	+	antisense_upstream	exon	NA	NA	1	m	ENST00000419531	NONCO242	TSS2705	TCONS_00003262	.
chr1	59359217	59359389	173	+	antisense_upstream	exon	NA	NA	2	m	ENST00000419531	NONCO242	TSS2705	TCONS_00003262	.
chr1	59361929	59362057	129	+	antisense_upstream	exon	NA	NA	3	m	ENST00000419531	NONCO242	TSS2705	TCONS_00003262	.
chr1	59364719	59365266	548	+	antisense_upstream	exon	NA	NA	4	m	ENST00000419531	NONCO242	TSS2705	TCONS_00003262	.
chr1	59486260	59486295	36	+	intergenic	exon	NA	NA	1	m	ENST00000438195	NONCO243	TSS2711	TCONS_00003265	.
chr1	59487160	59487249	90	+	intergenic	exon	NA	NA	2	m	ENST00000438195	NONCO243	TSS2711	TCONS_00003265	.
chr1	59507844	59507902	59	+	intergenic	exon	NA	NA	3	m	ENST00000438195	NONCO243	TSS2711	TCONS_00003265	.
chr1	59510166	59510286	121	+	intergenic	exon	NA	NA	4	m	ENST00000438195	NONCO243	TSS2711	TCONS_00003265	.
chr1	59522315	59522421	107	+	intergenic	exon	NA	NA	1	m	ENST00000449812	NONCO244	TSS2713	TCONS_00003267	r
chr1	59548240	59548380	141	+	intergenic	exon	NA	NA	2	m	ENST00000449812	NONCO244	TSS2713	TCONS_00003267	r
chr1	59552075	59552268	194	+	intergenic	exon	NA	NA	3	m	ENST00000449812	NONCO244	TSS2713	TCONS_00003267	r
chr1	59553687	59553867	181	+	intergenic	exon	NA	NA	4	m	ENST00000449812	NONCO244	TSS2713	TCONS_00003267	r
chr1	60580547	60580645	99	+	intergenic	exon	NA	NA	1	m	ENST00000456878	NONCO246	TSS2735	TCONS_00003296	.
chr1	60614185	60614325	141	+	intergenic	exon	NA	NA	2	m	ENST00000456878	NONCO246	TSS2735	TCONS_00003296	.
chr1	60614909	60615351	443	+	intergenic	exon	NA	NA	3	m	ENST00000456878	NONCO246	TSS2735	TCONS_00003296	.
chr1	63154153	63154323	171	+	antisense_upstream	exon	NA	NA	1	m	ENST00000453229	NONCO248	TSS2774	TCONS_00003345	.
chr1	63175309	63176365	1057	+	antisense_upstream	exon	NA	NA	2	m	ENST00000453229	NONCO248	TSS2774	TCONS_00003345	.
chr1	63361680	63361780	101	+	intergenic	exon	NA	NA	1	m	ENST00000450811	NONCO249	TSS2779	TCONS_00003352	r
chr1	63366965	63367310	346	+	intergenic	exon	NA	NA	2	m	ENST00000450811	NONCO249	TSS2779	TCONS_00003352	r
chr1	63489878	63489981	104	+	intergenic	exon	NA	NA	1	m	ENST00000418091	NONCO250	TSS2781	TCONS_00003354	.
chr1	63491075	63491329	255	+	intergenic	exon	NA	NA	2	m	ENST00000418091	NONCO250	TSS2781	TCONS_00003354	.
chr1	63604921	63605168	248	+	intergenic	exon	NA	NA	1	m	ENST00000455038	NONCO251	TSS2782	TCONS_00003355	.
chr1	63624707	63624874	168	+	intergenic	exon	NA	NA	2	m	ENST00000455038	NONCO251	TSS2782	TCONS_00003355	.
chr1	63628418	63628824	407	+	intergenic	exon	NA	NA	3	m	ENST00000455038	NONCO251	TSS2782	TCONS_00003355	.
chr1	63715591	63716147	557	+	intergenic	exon	NA	NA	1	m	ENST00000449140	NONCO252	TSS2783	TCONS_00003356	r
chr1	63717141	63717442	302	+	intergenic	exon	NA	NA	2	m	ENST00000449140	NONCO252	TSS2783	TCONS_00003356	r
chr1	67995313	67995432	120	+	intergenic	exon	NA	NA	1	m	ENST00000230113	NONCO257	TSS2899	TCONS_00003494	r
chr1	67995998	67996061	64	+	intergenic	exon	NA	NA	2	m	ENST00000230113	NONCO257	TSS2899	TCONS_00003494	r
chr1	67997789	67998012	224	+	intergenic	exon	NA	NA	3	m	ENST00000230113	NONCO257	TSS2899	TCONS_00003494	r
chr1	69521581	69521730	150	+	intergenic	exon	NA	NA	1	m	ENST00000425517	NONCO261	TSS2915	TCONS_00003511	.
chr1	69550863	69550981	119	+	intergenic	exon	NA	NA	2	m	ENST00000425517	NONCO261	TSS2915	TCONS_00003511	.
chr1	69554198	69554245	48	+	intergenic	exon	NA	NA	3	m	ENST00000425517	NONCO261	TSS2915	TCONS_00003511	.
chr1	69648453	69648544	92	+	intergenic	exon	NA	NA	4	m	ENST00000425517	NONCO261	TSS2915	TCONS_00003511	.
chr1	69650469	69650686	218	+	intergenic	exon	NA	NA	5	m	ENST00000425517	NONCO261	TSS2915	TCONS_00003511	.
chr1	69898938	69898988	51	+	intergenic	exon	NA	NA	1	m	ENST00000448001	NONCO262	TSS2917	TCONS_00003512	r
chr1	69900686	69901092	407	+	intergenic	exon	NA	NA	2	m	ENST00000448001	NONCO262	TSS2917	TCONS_00003512	r
chr1	71172136	71172214	79	+	intergenic	exon	NA	NA	1	m	ENST00000419450	NONCO264	TSS2954	TCONS_00003562	.
chr1	71173411	71173664	254	+	intergenic	exon	NA	NA	2	m	ENST00000419450	NONCO264	TSS2954	TCONS_00003562	.
chr1	71174404	71174453	50	+	intergenic	exon	NA	NA	3	m	ENST00000419450	NONCO264	TSS2954	TCONS_00003562	.
chr1	71177740	71177814	75	+	intergenic	exon	NA	NA	4	m	ENST00000419450	NONCO264	TSS2954	TCONS_00003562	.
chr1	71178812	71178990	179	+	intergenic	exon	NA	NA	5	m	ENST00000419450	NONCO264	TSS2954	TCONS_00003562	.
chr1	71243213	71243378	166	+	intergenic	exon	NA	NA	6	m	ENST00000419450	NONCO264	TSS2954	TCONS_00003562	.
chr1	71250869	71252151	1283	+	intergenic	exon	NA	NA	7	m	ENST00000419450	NONCO264	TSS2954	TCONS_00003562	.
chr1	71716682	71716741	60	+	intergenic	exon	NA	NA	1	m	ENST00000411721	NONCO268	TSS2966	TCONS_00003575	r
chr1	71717345	71717802	458	+	intergenic	exon	NA	NA	2	m	ENST00000411721	NONCO268	TSS2966	TCONS_00003575	r
chr1	73230714	73230763	50	+	intergenic	exon	NA	NA	1	m	ENST00000418078	NONCO269	TSS2971	TCONS_00003589	.
chr1	73240955	73241227	273	+	intergenic	exon	NA	NA	2	m	ENST00000418078	NONCO269	TSS2971	TCONS_00003589	.
chr1	73243956	73244040	85	+	intergenic	exon	NA	NA	3	m	ENST00000418078	NONCO269	TSS2971	TCONS_00003589	.
chr1	73245790	73245974	185	+	intergenic	exon	NA	NA	4	m	ENST00000418078	NONCO269	TSS2971	TCONS_00003589	.
chr1	73771853	73771957	105	+	intergenic	exon	NA	NA	1	m	ENST00000440762	NONCO270	TSS2973	TCONS_00003591	r
chr1	73772851	73773046	196	+	intergenic	exon	NA	NA	2	m	ENST00000440762	NONCO270	TSS2973	TCONS_00003591	r
chr1	73776536	73776673	138	+	intergenic	exon	NA	NA	3	m	ENST00000440762	NONCO270	TSS2973	TCONS_00003591	r
chr1	73801129	73804560	3432	+	intergenic	exon	NA	NA	4	m	ENST00000440762	NONCO270	TSS2973	TCONS_00003591	r
chr1	73771912	73771957	46	+	intergenic	exon	NA	NA	1	m	ENST00000444827	NONCO270	TSS2973	TCONS_00003592	r
chr1	73776536	73776673	138	+	intergenic	exon	NA	NA	2	m	ENST00000444827	NONCO270	TSS2973	TCONS_00003592	r
chr1	73813817	73813995	179	+	intergenic	exon	NA	NA	3	m	ENST00000444827	NONCO270	TSS2973	TCONS_00003592	r
chr1	73771917	73771957	41	+	intergenic	exon	NA	NA	1	m	ENST00000415686	NONCO270	TSS2973	TCONS_00003593	.
chr1	73776536	73776673	138	+	intergenic	exon	NA	NA	2	m	ENST00000415686	NONCO270	TSS2973	TCONS_00003593	.
chr1	73820756	73820934	179	+	intergenic	exon	NA	NA	3	m	ENST00000415686	NONCO270	TSS2973	TCONS_00003593	.
chr1	73771922	73771957	36	+	intergenic	exon	NA	NA	1	m	ENST00000411903	NONCO270	TSS2973	TCONS_00003594	.
chr1	73772851	73773255	405	+	intergenic	exon	NA	NA	2	m	ENST00000411903	NONCO270	TSS2973	TCONS_00003594	.
chr1	73772899	73773046	148	+	intergenic	exon	NA	NA	1	m	ENST00000452553	NONCO270	TSS2974	TCONS_00003595	r
chr1	73776536	73776673	138	+	intergenic	exon	NA	NA	2	m	ENST00000452553	NONCO270	TSS2974	TCONS_00003595	r
chr1	73785151	73785344	194	+	intergenic	exon	NA	NA	3	m	ENST00000452553	NONCO270	TSS2974	TCONS_00003595	r
chr1	74100899	74100924	26	+	intergenic	exon	NA	NA	1	m	ENST00000424953	NONCO271	TSS2975	TCONS_00003596	r
chr1	74165434	74165526	93	+	intergenic	exon	NA	NA	2	m	ENST00000424953	NONCO271	TSS2975	TCONS_00003596	r
chr1	74174827	74175264	438	+	intergenic	exon	NA	NA	3	m	ENST00000424953	NONCO271	TSS2975	TCONS_00003596	r
chr1	74175051	74175108	58	+	intergenic	exon	NA	NA	1	m	ENST00000436262	NONCO271	TSS2976	TCONS_00003597	.
chr1	74180636	74180897	262	+	intergenic	exon	NA	NA	2	m	ENST00000436262	NONCO271	TSS2976	TCONS_00003597	.
chr1	75428998	75429051	54	+	intergenic	exon	NA	NA	1	m	ENST00000438619	NONCO274	TSS2995	TCONS_00003633	.
chr1	75430518	75430802	285	+	intergenic	exon	NA	NA	2	m	ENST00000438619	NONCO274	TSS2995	TCONS_00003633	.
chr1	76477009	76477083	75	+	intergenic	exon	NA	NA	1	m	ENST00000436121	NONCO275	TSS3033	TCONS_00003678	.
chr1	76478945	76479015	71	+	intergenic	exon	NA	NA	2	m	ENST00000436121	NONCO275	TSS3033	TCONS_00003678	.
chr1	76484819	76485041	223	+	intergenic	exon	NA	NA	3	m	ENST00000436121	NONCO275	TSS3033	TCONS_00003678	.
chr1	76507376	76507583	208	+	intergenic	exon	NA	NA	1	m	ENST00000434540	NONCO276	TSS3034	TCONS_00003679	.
chr1	76531723	76531913	191	+	intergenic	exon	NA	NA	2	m	ENST00000434540	NONCO276	TSS3034	TCONS_00003679	.
chr1	79789454	79789644	191	+	intergenic	exon	NA	NA	1	m	ENST00000415629	NONCO282	TSS3119	TCONS_00003770	r
chr1	79790385	79790548	164	+	intergenic	exon	NA	NA	2	m	ENST00000415629	NONCO282	TSS3119	TCONS_00003770	r
chr1	81001440	81001627	188	+	intergenic	exon	NA	NA	1	m	ENST00000418041	NONCO283	TSS3124	TCONS_00003775	.
chr1	81109910	81110038	129	+	intergenic	exon	NA	NA	2	m	ENST00000418041	NONCO283	TSS3124	TCONS_00003775	.
chr1	81112248	81112473	226	+	intergenic	exon	NA	NA	3	m	ENST00000418041	NONCO283	TSS3124	TCONS_00003775	.
chr1	81001440	81001627	188	+	intergenic	exon	NA	NA	1	m	ENST00000443104	NONCO283	TSS3124	TCONS_00003776	.
chr1	81006274	81006321	48	+	intergenic	exon	NA	NA	2	m	ENST00000443104	NONCO283	TSS3124	TCONS_00003776	.
chr1	81109910	81110038	129	+	intergenic	exon	NA	NA	3	m	ENST00000443104	NONCO283	TSS3124	TCONS_00003776	.
chr1	81112248	81112473	226	+	intergenic	exon	NA	NA	4	m	ENST00000443104	NONCO283	TSS3124	TCONS_00003776	.
chr1	81106969	81107086	118	+	intergenic	exon	NA	NA	1	m	ENST00000443565	NONCO283	TSS3125	TCONS_00003777	.
chr1	81109910	81110038	129	+	intergenic	exon	NA	NA	2	m	ENST00000443565	NONCO283	TSS3125	TCONS_00003777	.
chr1	81112248	81112473	226	+	intergenic	exon	NA	NA	3	m	ENST00000443565	NONCO283	TSS3125	TCONS_00003777	.
chr1	83368866	83369506	641	+	intergenic	exon	NA	NA	1	m	ENST00000452901	NONCO286	TSS3143	TCONS_00003808	r
chr1	83373151	83373265	115	+	intergenic	exon	NA	NA	2	m	ENST00000452901	NONCO286	TSS3143	TCONS_00003808	r
chr1	83457543	83457663	121	+	intergenic	exon	NA	NA	3	m	ENST00000452901	NONCO286	TSS3143	TCONS_00003808	r
chr1	83462398	83462459	62	+	intergenic	exon	NA	NA	4	m	ENST00000452901	NONCO286	TSS3143	TCONS_00003808	r
chr1	83463156	83463272	117	+	intergenic	exon	NA	NA	5	m	ENST00000452901	NONCO286	TSS3143	TCONS_00003808	r
chr1	83541824	83541907	84	+	intergenic	exon	NA	NA	6	m	ENST00000452901	NONCO286	TSS3143	TCONS_00003808	r
chr1	83551895	83551997	103	+	intergenic	exon	NA	NA	7	m	ENST00000452901	NONCO286	TSS3143	TCONS_00003808	r
chr1	83559484	83559666	183	+	intergenic	exon	NA	NA	8	m	ENST00000452901	NONCO286	TSS3143	TCONS_00003808	r
chr1	83562548	83562660	113	+	intergenic	exon	NA	NA	9	m	ENST00000452901	NONCO286	TSS3143	TCONS_00003808	r
chr1	83626289	83626349	61	+	intergenic	exon	NA	NA	10	m	ENST00000452901	NONCO286	TSS3143	TCONS_00003808	r
chr1	83632387	83632498	112	+	intergenic	exon	NA	NA	11	m	ENST00000452901	NONCO286	TSS3143	TCONS_00003808	r
chr1	83373245	83373265	21	+	intergenic	exon	NA	NA	1	m	ENST00000419658	NONCO286	TSS3144	TCONS_00003809	r
chr1	83418355	83418520	166	+	intergenic	exon	NA	NA	2	m	ENST00000419658	NONCO286	TSS3144	TCONS_00003809	r
chr1	83462398	83462459	62	+	intergenic	exon	NA	NA	3	m	ENST00000419658	NONCO286	TSS3144	TCONS_00003809	r
chr1	83463156	83463244	89	+	intergenic	exon	NA	NA	4	m	ENST00000419658	NONCO286	TSS3144	TCONS_00003809	r
chr1	83911736	83912357	622	+	intergenic	exon	NA	NA	1	m	ENST00000446227	NONCO287	TSS3145	TCONS_00003810	.
chr1	83920341	83920454	114	+	intergenic	exon	NA	NA	2	m	ENST00000446227	NONCO287	TSS3145	TCONS_00003810	.
chr1	84255963	84256125	163	+	intergenic	exon	NA	NA	1	m	ENST00000439186	NONCO288	TSS3146	TCONS_00003811	.
chr1	84266377	84266469	93	+	intergenic	exon	NA	NA	2	m	ENST00000439186	NONCO288	TSS3146	TCONS_00003811	.
chr1	84266722	84267148	427	+	intergenic	exon	NA	NA	3	m	ENST00000439186	NONCO288	TSS3146	TCONS_00003811	.
chr1	1822910	1823290	381	+	antisense_upstream	exon	NA	NA	1	m	ENST00000412228	NONCO29	TSS220	TCONS_00000254	.
chr1	1823573	1824097	525	+	antisense_upstream	exon	NA	NA	2	m	ENST00000412228	NONCO29	TSS220	TCONS_00000254	.
chr1	86064814	86064914	101	+	intergenic	exon	NA	NA	1	m	ENST00000426794	NONCO290	TSS3190	TCONS_00003873	.
chr1	86066264	86066417	154	+	intergenic	exon	NA	NA	2	m	ENST00000426794	NONCO290	TSS3190	TCONS_00003873	.
chr1	89790205	89790449	245	+	intergenic	exon	NA	NA	1	m	ENST00000428912	NONCO295	TSS3254	TCONS_00003930	.
chr1	89797621	89797898	278	+	intergenic	exon	NA	NA	2	m	ENST00000428912	NONCO295	TSS3254	TCONS_00003930	.
chr1	89798581	89798788	208	+	intergenic	exon	NA	NA	3	m	ENST00000428912	NONCO295	TSS3254	TCONS_00003930	.
chr1	89800498	89800563	66	+	intergenic	exon	NA	NA	4	m	ENST00000428912	NONCO295	TSS3254	TCONS_00003930	.
chr1	90254473	90254541	69	+	intergenic	exon	NA	NA	1	m	ENST00000432395	NONCO297	TSS3275	TCONS_00003948	.
chr1	90255612	90256051	440	+	intergenic	exon	NA	NA	2	m	ENST00000432395	NONCO297	TSS3275	TCONS_00003948	.
chr1	91317316	91317836	521	+	intergenic	exon	NA	NA	1	m	ENST00000425185	NONCO299	TSS3281	TCONS_00003964	.
chr1	91319785	91319843	59	+	intergenic	exon	NA	NA	2	m	ENST00000425185	NONCO299	TSS3281	TCONS_00003964	.
chr1	160446	160690	245	+	intergenic	exon	NA	NA	1	m	ENST00000496488	NONCO3	TSS11	TCONS_00000012	.
chr1	161314	161525	212	+	intergenic	exon	NA	NA	2	m	ENST00000496488	NONCO3	TSS11	TCONS_00000012	.
chr1	94610667	94610769	103	+	intergenic	exon	NA	NA	1	m	ENST00000439455	NONCO303	TSS3357	TCONS_00004070	.
chr1	94610927	94611175	249	+	intergenic	exon	NA	NA	2	m	ENST00000439455	NONCO303	TSS3357	TCONS_00004070	.
chr1	94713464	94713595	132	+	intergenic	exon	NA	NA	1	m	ENST00000413103	NONCO304	TSS3359	TCONS_00004072	.
chr1	94714969	94715048	80	+	intergenic	exon	NA	NA	2	m	ENST00000413103	NONCO304	TSS3359	TCONS_00004072	.
chr1	94798823	94798965	143	+	intergenic	exon	NA	NA	1	m	ENST00000418242	NONCO305	TSS3363	TCONS_00004074	.
chr1	94800068	94800404	337	+	intergenic	exon	NA	NA	2	m	ENST00000418242	NONCO305	TSS3363	TCONS_00004074	.
chr1	95393122	95393181	60	+	antisense_upstream	exon	NA	NA	1	m	ENST00000452846	NONCO307	TSS3378	TCONS_00004096	.
chr1	95393907	95393958	52	+	antisense_upstream	exon	NA	NA	2	m	ENST00000452846	NONCO307	TSS3378	TCONS_00004096	.
chr1	95397428	95397541	114	+	antisense_upstream	exon	NA	NA	3	m	ENST00000452846	NONCO307	TSS3378	TCONS_00004096	.
chr1	95428535	95428826	292	+	antisense_upstream	exon	NA	NA	4	m	ENST00000452846	NONCO307	TSS3378	TCONS_00004096	.
chr1	95393584	95393958	375	+	antisense_upstream	exon	NA	NA	1	m	ENST00000438509	NONCO307	TSS3379	TCONS_00004097	.
chr1	95397428	95397541	114	+	antisense_upstream	exon	NA	NA	2	m	ENST00000438509	NONCO307	TSS3379	TCONS_00004097	.
chr1	95426873	95426989	117	+	antisense_upstream	exon	NA	NA	3	m	ENST00000438509	NONCO307	TSS3379	TCONS_00004097	.
chr1	95428481	95428826	346	+	antisense_upstream	exon	NA	NA	4	m	ENST00000438509	NONCO307	TSS3379	TCONS_00004097	.
chr1	95426881	95426989	109	+	antisense_upstream	exon	NA	NA	1	m	ENST00000456582	NONCO307	TSS3380	TCONS_00004098	.
chr1	95428535	95428826	292	+	antisense_upstream	exon	NA	NA	2	m	ENST00000456582	NONCO307	TSS3380	TCONS_00004098	.
chr1	95940293	95940731	439	+	intergenic	exon	NA	NA	1	m	ENST00000424943	NONCO312	TSS3395	TCONS_00004115	r
chr1	95940870	95940930	61	+	intergenic	exon	NA	NA	2	m	ENST00000424943	NONCO312	TSS3395	TCONS_00004115	r
chr1	95942300	95942536	237	+	intergenic	exon	NA	NA	3	m	ENST00000424943	NONCO312	TSS3395	TCONS_00004115	r
chr1	95942895	95944912	2018	+	intergenic	exon	NA	NA	4	m	ENST00000424943	NONCO312	TSS3395	TCONS_00004115	r
chr1	95975672	95975918	247	+	intergenic	exon	NA	NA	1	m	ENST00000440116	NONCO313	TSS3396	TCONS_00004116	.
chr1	95979707	95980285	579	+	intergenic	exon	NA	NA	2	m	ENST00000440116	NONCO313	TSS3396	TCONS_00004116	.
chr1	95975723	95975918	196	+	intergenic	exon	NA	NA	1	m	ENST00000456933	NONCO313	TSS3396	TCONS_00004117	.
chr1	96004138	96004248	111	+	intergenic	exon	NA	NA	2	m	ENST00000456933	NONCO313	TSS3396	TCONS_00004117	.
chr1	96242703	96242934	232	+	intergenic	exon	NA	NA	3	m	ENST00000456933	NONCO313	TSS3396	TCONS_00004117	.
chr1	96247724	96247898	175	+	intergenic	exon	NA	NA	4	m	ENST00000456933	NONCO313	TSS3396	TCONS_00004117	.
chr1	95975896	95975918	23	+	intergenic	exon	NA	NA	1	m	ENST00000411798	NONCO313	TSS3397	TCONS_00004118	r
chr1	95978076	95978178	103	+	intergenic	exon	NA	NA	2	m	ENST00000411798	NONCO313	TSS3397	TCONS_00004118	r
chr1	95979707	95981020	1314	+	intergenic	exon	NA	NA	3	m	ENST00000411798	NONCO313	TSS3397	TCONS_00004118	r
chr1	96208652	96208758	107	+	intergenic	exon	NA	NA	1	m	ENST00000603401	NONCO314	TSS3398	TCONS_00004119	r
chr1	96224847	96225026	180	+	intergenic	exon	NA	NA	2	m	ENST00000603401	NONCO314	TSS3398	TCONS_00004119	r
chr1	98676303	98676366	64	+	intergenic	exon	NA	NA	1	m	ENST00000418344	NONCO319	TSS3427	TCONS_00004156	r
chr1	98715002	98715102	101	+	intergenic	exon	NA	NA	2	m	ENST00000418344	NONCO319	TSS3427	TCONS_00004156	r
chr1	98736151	98738214	2064	+	intergenic	exon	NA	NA	3	m	ENST00000418344	NONCO319	TSS3427	TCONS_00004156	r
chr1	101491434	101491617	184	+	antisense_upstream	exon	NA	NA	1	m	ENST00000453011	NONCO323	TSS3503	TCONS_00004234	.
chr1	101538216	101538386	171	+	antisense_upstream	exon	NA	NA	2	m	ENST00000453011	NONCO323	TSS3503	TCONS_00004234	.
chr1	101540832	101540950	119	+	antisense_upstream	exon	NA	NA	3	m	ENST00000453011	NONCO323	TSS3503	TCONS_00004234	.
chr1	101542919	101543064	146	+	antisense_upstream	exon	NA	NA	4	m	ENST00000453011	NONCO323	TSS3503	TCONS_00004234	.
chr1	101545945	101546118	174	+	antisense_upstream	exon	NA	NA	5	m	ENST00000453011	NONCO323	TSS3503	TCONS_00004234	.
chr1	101491475	101491617	143	+	antisense_upstream	exon	NA	NA	1	m	ENST00000446527	NONCO323	TSS3503	TCONS_00004235	.
chr1	101540951	101541272	322	+	antisense_upstream	exon	NA	NA	2	m	ENST00000446527	NONCO323	TSS3503	TCONS_00004235	.
chr1	101542919	101543064	146	+	antisense_upstream	exon	NA	NA	3	m	ENST00000446527	NONCO323	TSS3503	TCONS_00004235	.
chr1	101549017	101549130	114	+	antisense_upstream	exon	NA	NA	4	m	ENST00000446527	NONCO323	TSS3503	TCONS_00004235	.
chr1	101552408	101552727	320	+	antisense_upstream	exon	NA	NA	5	m	ENST00000446527	NONCO323	TSS3503	TCONS_00004235	.
chr1	101529167	101529195	29	+	antisense_upstream	exon	NA	NA	1	m	ENST00000416329	NONCO323	TSS3504	TCONS_00004236	.
chr1	101538216	101538386	171	+	antisense_upstream	exon	NA	NA	2	m	ENST00000416329	NONCO323	TSS3504	TCONS_00004236	.
chr1	101540832	101540950	119	+	antisense_upstream	exon	NA	NA	3	m	ENST00000416329	NONCO323	TSS3504	TCONS_00004236	.
chr1	101542919	101543064	146	+	antisense_upstream	exon	NA	NA	4	m	ENST00000416329	NONCO323	TSS3504	TCONS_00004236	.
chr1	101545945	101546169	225	+	antisense_upstream	exon	NA	NA	5	m	ENST00000416329	NONCO323	TSS3504	TCONS_00004236	.
chr1	101549017	101549039	23	+	antisense_upstream	exon	NA	NA	6	m	ENST00000416329	NONCO323	TSS3504	TCONS_00004236	.
chr1	101538216	101538386	171	+	antisense_upstream	exon	NA	NA	1	m	ENST00000454721	NONCO323	TSS3505	TCONS_00004237	.
chr1	101540951	101541272	322	+	antisense_upstream	exon	NA	NA	2	m	ENST00000454721	NONCO323	TSS3505	TCONS_00004237	.
chr1	101542919	101543064	146	+	antisense_upstream	exon	NA	NA	3	m	ENST00000454721	NONCO323	TSS3505	TCONS_00004237	.
chr1	101549017	101549130	114	+	antisense_upstream	exon	NA	NA	4	m	ENST00000454721	NONCO323	TSS3505	TCONS_00004237	.
chr1	101538216	101538386	171	+	antisense_upstream	exon	NA	NA	1	m	ENST00000449473	NONCO323	TSS3505	TCONS_00004238	.
chr1	101540832	101540950	119	+	antisense_upstream	exon	NA	NA	2	m	ENST00000449473	NONCO323	TSS3505	TCONS_00004238	.
chr1	101542919	101543064	146	+	antisense_upstream	exon	NA	NA	3	m	ENST00000449473	NONCO323	TSS3505	TCONS_00004238	.
chr1	101545945	101546169	225	+	antisense_upstream	exon	NA	NA	4	m	ENST00000449473	NONCO323	TSS3505	TCONS_00004238	.
chr1	101549017	101549130	114	+	antisense_upstream	exon	NA	NA	5	m	ENST00000449473	NONCO323	TSS3505	TCONS_00004238	.
chr1	101550608	101550713	106	+	antisense_upstream	exon	NA	NA	6	m	ENST00000449473	NONCO323	TSS3505	TCONS_00004238	.
chr1	101552408	101552821	414	+	antisense_upstream	exon	NA	NA	7	m	ENST00000449473	NONCO323	TSS3505	TCONS_00004238	.
chr1	101548010	101549130	1121	+	antisense_upstream	exon	NA	NA	1	m	ENST00000451213	NONCO323	TSS3506	TCONS_00004239	.
chr1	101552408	101552817	410	+	antisense_upstream	exon	NA	NA	2	m	ENST00000451213	NONCO323	TSS3506	TCONS_00004239	.
chr1	101788893	101789022	130	+	intergenic	exon	NA	NA	1	m	ENST00000454466	NONCO325	TSS3514	TCONS_00004247	.
chr1	101815603	101815732	130	+	intergenic	exon	NA	NA	2	m	ENST00000454466	NONCO325	TSS3514	TCONS_00004247	.
chr1	101789393	101789431	39	+	intergenic	exon	NA	NA	1	m	ENST00000439146	NONCO325	TSS3515	TCONS_00004248	r
chr1	101809395	101809551	157	+	intergenic	exon	NA	NA	2	m	ENST00000439146	NONCO325	TSS3515	TCONS_00004248	r
chr1	101811319	101811401	83	+	intergenic	exon	NA	NA	3	m	ENST00000439146	NONCO325	TSS3515	TCONS_00004248	r
chr1	101815603	101815741	139	+	intergenic	exon	NA	NA	4	m	ENST00000439146	NONCO325	TSS3515	TCONS_00004248	r
chr1	101842814	101842869	56	+	intergenic	exon	NA	NA	5	m	ENST00000439146	NONCO325	TSS3515	TCONS_00004248	r
chr1	101815605	101815741	137	+	intergenic	exon	NA	NA	1	m	ENST00000444327	NONCO325	TSS3516	TCONS_00004249	.
chr1	101855226	101855859	634	+	intergenic	exon	NA	NA	2	m	ENST00000444327	NONCO325	TSS3516	TCONS_00004249	.
chr1	102189298	102189431	134	+	intergenic	exon	NA	NA	1	m	ENST00000415532	NONCO326	TSS3518	TCONS_00004250	.
chr1	102194827	102195170	344	+	intergenic	exon	NA	NA	2	m	ENST00000415532	NONCO326	TSS3518	TCONS_00004250	.
chr1	103817769	103817825	57	+	intergenic	exon	NA	NA	1	m	ENST00000424955	NONCO327	TSS3522	TCONS_00004254	.
chr1	103827995	103828355	361	+	intergenic	exon	NA	NA	2	m	ENST00000424955	NONCO327	TSS3522	TCONS_00004254	.
chr1	103957501	103957557	57	+	intergenic	exon	NA	NA	1	m	ENST00000414923	NONCO328	TSS3523	TCONS_00004255	.
chr1	103967727	103968087	361	+	intergenic	exon	NA	NA	2	m	ENST00000414923	NONCO328	TSS3523	TCONS_00004255	.
chr1	104615645	104616526	882	+	intergenic	exon	NA	NA	1	m	ENST00000418362	NONCO329	TSS3547	TCONS_00004284	.
chr1	104619367	104619709	343	+	intergenic	exon	NA	NA	2	m	ENST00000418362	NONCO329	TSS3547	TCONS_00004284	.
chr1	106615869	106616033	165	+	intergenic	exon	NA	NA	1	m	ENST00000437803	NONCO331	TSS3552	TCONS_00004288	.
chr1	106625587	106625708	122	+	intergenic	exon	NA	NA	2	m	ENST00000437803	NONCO331	TSS3552	TCONS_00004288	.
chr1	106627052	106627121	70	+	intergenic	exon	NA	NA	3	m	ENST00000437803	NONCO331	TSS3552	TCONS_00004288	.
chr1	106623783	106624046	264	+	intergenic	exon	NA	NA	1	m	ENST00000429608	NONCO331	TSS3553	TCONS_00004289	.
chr1	106627052	106627118	67	+	intergenic	exon	NA	NA	2	m	ENST00000429608	NONCO331	TSS3553	TCONS_00004289	.
chr1	107360861	107360981	121	+	intergenic	exon	NA	NA	1	m	ENST00000415910	NONCO332	TSS3555	TCONS_00004291	.
chr1	107362826	107363364	539	+	intergenic	exon	NA	NA	2	m	ENST00000415910	NONCO332	TSS3555	TCONS_00004291	.
chr1	107380742	107380789	48	+	intergenic	exon	NA	NA	3	m	ENST00000415910	NONCO332	TSS3555	TCONS_00004291	.
chr1	108614104	108614259	156	+	intergenic	exon	NA	NA	1	m	ENST00000419428	NONCO334	TSS3568	TCONS_00004310	.
chr1	108615171	108615319	149	+	intergenic	exon	NA	NA	2	m	ENST00000419428	NONCO334	TSS3568	TCONS_00004310	.
chr1	108617015	108617141	127	+	intergenic	exon	NA	NA	3	m	ENST00000419428	NONCO334	TSS3568	TCONS_00004310	.
chr1	108614993	108615319	327	+	intergenic	exon	NA	NA	1	m	ENST00000451023	NONCO334	TSS3569	TCONS_00004311	r
chr1	108617015	108617115	101	+	intergenic	exon	NA	NA	2	m	ENST00000451023	NONCO334	TSS3569	TCONS_00004311	r
chr1	110370977	110371073	97	+	intergenic	exon	NA	NA	1	m	ENST00000453347	NONCO340	TSS3722	TCONS_00004493	r
chr1	110371559	110371752	194	+	intergenic	exon	NA	NA	2	m	ENST00000453347	NONCO340	TSS3722	TCONS_00004493	r
chr1	110375922	110376037	116	+	intergenic	exon	NA	NA	3	m	ENST00000453347	NONCO340	TSS3722	TCONS_00004493	r
chr1	110413990	110414058	69	+	intergenic	exon	NA	NA	4	m	ENST00000453347	NONCO340	TSS3722	TCONS_00004493	r
chr1	112532392	112532810	419	+	antisense_upstream	exon	NA	NA	1	m	ENST00000442751	NONCO352	TSS3868	TCONS_00004670	.
chr1	112533190	112533745	556	+	antisense_upstream	exon	NA	NA	2	m	ENST00000442751	NONCO352	TSS3868	TCONS_00004670	.
chr1	112533158	112533809	652	+	antisense_upstream	exon	NA	NA	1	m	ENST00000438293	NONCO352	TSS3870	TCONS_00004672	.
chr1	112539049	112541464	2416	+	antisense_upstream	exon	NA	NA	2	m	ENST00000438293	NONCO352	TSS3870	TCONS_00004672	.
chr1	113392650	113393049	400	+	intergenic	exon	NA	NA	1	m	ENST00000456651	NONCO353	TSS3899	TCONS_00004709	r
chr1	113419562	113419606	45	+	intergenic	exon	NA	NA	2	m	ENST00000456651	NONCO353	TSS3899	TCONS_00004709	r
chr1	113420352	113420493	142	+	intergenic	exon	NA	NA	3	m	ENST00000456651	NONCO353	TSS3899	TCONS_00004709	r
chr1	113392698	113393049	352	+	intergenic	exon	NA	NA	1	m	ENST00000422022	NONCO353	TSS3899	TCONS_00004710	r
chr1	113420352	113420489	138	+	intergenic	exon	NA	NA	2	m	ENST00000422022	NONCO353	TSS3899	TCONS_00004710	r
chr1	113550876	113550982	107	+	intergenic	exon	NA	NA	1	m	ENST00000413231	NONCO355	TSS3907	TCONS_00004720	.
chr1	113589408	113589677	270	+	intergenic	exon	NA	NA	2	m	ENST00000413231	NONCO355	TSS3907	TCONS_00004720	.
chr1	113576295	113576460	166	+	intergenic	exon	NA	NA	1	m	ENST00000451149	NONCO355	TSS3908	TCONS_00004721	.
chr1	113589408	113589677	270	+	intergenic	exon	NA	NA	2	m	ENST00000451149	NONCO355	TSS3908	TCONS_00004721	.
chr1	114896608	114897391	784	+	intergenic	exon	NA	NA	1	m	ENST00000604963	NONCO358	TSS3943	TCONS_00004758	.
chr1	114897721	114897800	80	+	intergenic	exon	NA	NA	2	m	ENST00000604963	NONCO358	TSS3943	TCONS_00004758	.
chr1	3816936	3817195	260	+	antisense_upstream	exon	NA	NA	1	m	ENST00000413332	NONCO36	TSS384	TCONS_00000427	.
chr1	3820529	3820600	72	+	antisense_upstream	exon	NA	NA	2	m	ENST00000413332	NONCO36	TSS384	TCONS_00000427	.
chr1	3821795	3822096	302	+	antisense_upstream	exon	NA	NA	3	m	ENST00000413332	NONCO36	TSS384	TCONS_00000427	.
chr1	3816968	3817195	228	+	antisense_upstream	exon	NA	NA	1	m	ENST00000442673	NONCO36	TSS384	TCONS_00000428	.
chr1	3830959	3833789	2831	+	antisense_upstream	exon	NA	NA	2	m	ENST00000442673	NONCO36	TSS384	TCONS_00000428	.
chr1	3816936	3817195	260	+	antisense_upstream	exon	NA	NA	1	m	Human-IGR37-R1.tophat.651.2	NONCO36	TSS384	TCONS_00000429	.
chr1	3820529	3820600	72	+	antisense_upstream	exon	NA	NA	2	m	Human-IGR37-R1.tophat.651.2	NONCO36	TSS384	TCONS_00000429	.
chr1	3830256	3830854	599	+	antisense_upstream	exon	NA	NA	3	m	Human-IGR37-R1.tophat.651.2	NONCO36	TSS384	TCONS_00000429	.
chr1	3830959	3833818	2860	+	antisense_upstream	exon	NA	NA	4	m	Human-IGR37-R1.tophat.651.2	NONCO36	TSS384	TCONS_00000429	.
chr1	115642293	115642372	80	+	intergenic	exon	NA	NA	1	m	ENST00000448680	NONCO361	TSS3973	TCONS_00004773	r
chr1	115644869	115645279	411	+	intergenic	exon	NA	NA	2	m	ENST00000448680	NONCO361	TSS3973	TCONS_00004773	r
chr1	116014562	116014673	112	+	intergenic	exon	NA	NA	1	m	ENST00000457493	NONCO365	TSS3978	TCONS_00004775	.
chr1	116015280	116015411	132	+	intergenic	exon	NA	NA	2	m	ENST00000457493	NONCO365	TSS3978	TCONS_00004775	.
chr1	116017440	116017745	306	+	intergenic	exon	NA	NA	3	m	ENST00000457493	NONCO365	TSS3978	TCONS_00004775	.
chr1	116018118	116018261	144	+	intergenic	exon	NA	NA	4	m	ENST00000457493	NONCO365	TSS3978	TCONS_00004775	.
chr1	116018549	116018648	100	+	intergenic	exon	NA	NA	5	m	ENST00000457493	NONCO365	TSS3978	TCONS_00004775	.
chr1	116099447	116099670	224	+	intergenic	exon	NA	NA	1	m	ENST00000422460	NONCO366	TSS3981	TCONS_00004777	.
chr1	116099976	116100096	121	+	intergenic	exon	NA	NA	2	m	ENST00000422460	NONCO366	TSS3981	TCONS_00004777	.
chr1	116461997	116462180	184	+	intergenic	exon	NA	NA	1	m	ENST00000438885	NONCO367	TSS3988	TCONS_00004786	.
chr1	116464988	116465066	79	+	intergenic	exon	NA	NA	2	m	ENST00000438885	NONCO367	TSS3988	TCONS_00004786	.
chr1	116467397	116468529	1133	+	intergenic	exon	NA	NA	3	m	ENST00000438885	NONCO367	TSS3988	TCONS_00004786	.
chr1	116706905	116706964	60	+	intergenic	exon	NA	NA	1	m	ENST00000426515	NONCO368	TSS4000	TCONS_00004798	.
chr1	116708009	116708862	854	+	intergenic	exon	NA	NA	2	m	ENST00000426515	NONCO368	TSS4000	TCONS_00004798	.
chr1	4000673	4000758	86	+	intergenic	exon	NA	NA	1	m	ENST00000456897	NONCO37	TSS386	TCONS_00000430	r
chr1	4001054	4001203	150	+	intergenic	exon	NA	NA	2	m	ENST00000456897	NONCO37	TSS386	TCONS_00000430	r
chr1	4009087	4009411	325	+	intergenic	exon	NA	NA	3	m	ENST00000456897	NONCO37	TSS386	TCONS_00000430	r
chr1	4000677	4000758	82	+	intergenic	exon	NA	NA	1	m	ENST00000412674	NONCO37	TSS386	TCONS_00000431	.
chr1	4001054	4001203	150	+	intergenic	exon	NA	NA	2	m	ENST00000412674	NONCO37	TSS386	TCONS_00000431	.
chr1	4012313	4015322	3010	+	intergenic	exon	NA	NA	3	m	ENST00000412674	NONCO37	TSS386	TCONS_00000431	.
chr1	117838142	117838325	184	+	intergenic	exon	NA	NA	1	m	ENST00000442182	NONCO371	TSS4041	TCONS_00004841	.
chr1	117839142	117839255	114	+	intergenic	exon	NA	NA	2	m	ENST00000442182	NONCO371	TSS4041	TCONS_00004841	.
chr1	117863746	117863958	213	+	intergenic	exon	NA	NA	3	m	ENST00000442182	NONCO371	TSS4041	TCONS_00004841	.
chr1	119870799	119870910	112	+	intergenic	exon	NA	NA	1	m	ENST00000420059	NONCO376	TSS4065	TCONS_00004863	.
chr1	119871367	119871412	46	+	intergenic	exon	NA	NA	2	m	ENST00000420059	NONCO376	TSS4065	TCONS_00004863	.
chr1	119873155	119873438	284	+	intergenic	exon	NA	NA	3	m	ENST00000420059	NONCO376	TSS4065	TCONS_00004863	.
chr1	119870875	119870910	36	+	intergenic	exon	NA	NA	1	m	ENST00000457683	NONCO376	TSS4065	TCONS_00004864	.
chr1	119871367	119871412	46	+	intergenic	exon	NA	NA	2	m	ENST00000457683	NONCO376	TSS4065	TCONS_00004864	.
chr1	119897040	119897156	117	+	intergenic	exon	NA	NA	3	m	ENST00000457683	NONCO376	TSS4065	TCONS_00004864	.
chr1	119898614	119898805	192	+	intergenic	exon	NA	NA	4	m	ENST00000457683	NONCO376	TSS4065	TCONS_00004864	.
chr1	120081132	120081276	145	+	intergenic	exon	NA	NA	1	m	ENST00000514706	NONCO378	TSS4076	TCONS_00004884	.
chr1	120085418	120085582	165	+	intergenic	exon	NA	NA	2	m	ENST00000514706	NONCO378	TSS4076	TCONS_00004884	.
chr1	120087853	120088536	684	+	intergenic	exon	NA	NA	3	m	ENST00000514706	NONCO378	TSS4076	TCONS_00004884	.
chr1	4472111	4472692	582	+	intergenic	exon	NA	NA	1	m	ENST00000423197	NONCO38	TSS387	TCONS_00000432	r
chr1	4475613	4475647	35	+	intergenic	exon	NA	NA	2	m	ENST00000423197	NONCO38	TSS387	TCONS_00000432	r
chr1	4476372	4476608	237	+	intergenic	exon	NA	NA	3	m	ENST00000423197	NONCO38	TSS387	TCONS_00000432	r
chr1	4482820	4483247	428	+	intergenic	exon	NA	NA	4	m	ENST00000423197	NONCO38	TSS387	TCONS_00000432	r
chr1	4483408	4483508	101	+	intergenic	exon	NA	NA	5	m	ENST00000423197	NONCO38	TSS387	TCONS_00000432	r
chr1	4484054	4484747	694	+	intergenic	exon	NA	NA	6	m	ENST00000423197	NONCO38	TSS387	TCONS_00000432	r
chr1	120906028	120906419	392	+	intergenic	exon	NA	NA	1	m	ENST00000430394	NONCO381	TSS4120	TCONS_00004913	.
chr1	120914714	120915073	360	+	intergenic	exon	NA	NA	2	m	ENST00000430394	NONCO381	TSS4120	TCONS_00004913	.
chr1	121138614	121139164	551	+	intergenic	exon	NA	NA	1	m	ENST00000417218	NONCO384	TSS4132	TCONS_00004924	.
chr1	121201873	121204983	3111	+	intergenic	exon	NA	NA	2	m	ENST00000417218	NONCO384	TSS4132	TCONS_00004924	.
chr1	121154579	121154612	34	+	intergenic	exon	NA	NA	1	m	ENST00000445260	NONCO384	TSS4133	TCONS_00004925	r
chr1	121166924	121167072	149	+	intergenic	exon	NA	NA	2	m	ENST00000445260	NONCO384	TSS4133	TCONS_00004925	r
chr1	121169824	121169924	101	+	intergenic	exon	NA	NA	3	m	ENST00000445260	NONCO384	TSS4133	TCONS_00004925	r
chr1	121170890	121171134	245	+	intergenic	exon	NA	NA	4	m	ENST00000445260	NONCO384	TSS4133	TCONS_00004925	r
chr1	142553293	142553496	204	+	intergenic	exon	NA	NA	1	m	ENST00000445662	NONCO385	TSS4148	TCONS_00004935	.
chr1	142557333	142557370	38	+	intergenic	exon	NA	NA	2	m	ENST00000445662	NONCO385	TSS4148	TCONS_00004935	.
chr1	142558448	142559170	723	+	intergenic	exon	NA	NA	3	m	ENST00000445662	NONCO385	TSS4148	TCONS_00004935	.
chr1	142618769	142618856	88	+	intergenic	exon	NA	NA	1	m	ENST00000446205	NONCO386	TSS4149	TCONS_00004936	.
chr1	142619387	142619579	193	+	intergenic	exon	NA	NA	2	m	ENST00000446205	NONCO386	TSS4149	TCONS_00004936	.
chr1	142621001	142621059	59	+	intergenic	exon	NA	NA	3	m	ENST00000446205	NONCO386	TSS4149	TCONS_00004936	.
chr1	142624070	142624129	60	+	intergenic	exon	NA	NA	4	m	ENST00000446205	NONCO386	TSS4149	TCONS_00004936	.
chr1	142690864	142690965	102	+	intergenic	exon	NA	NA	5	m	ENST00000446205	NONCO386	TSS4149	TCONS_00004936	.
chr1	142692155	142692387	233	+	intergenic	exon	NA	NA	6	m	ENST00000446205	NONCO386	TSS4149	TCONS_00004936	.
chr1	142618771	142618856	86	+	intergenic	exon	NA	NA	1	m	ENST00000400755	NONCO386	TSS4149	TCONS_00004937	r
chr1	142621001	142621059	59	+	intergenic	exon	NA	NA	2	m	ENST00000400755	NONCO386	TSS4149	TCONS_00004937	r
chr1	142624070	142624129	60	+	intergenic	exon	NA	NA	3	m	ENST00000400755	NONCO386	TSS4149	TCONS_00004937	r
chr1	142670568	142670607	40	+	intergenic	exon	NA	NA	4	m	ENST00000400755	NONCO386	TSS4149	TCONS_00004937	r
chr1	142678719	142679074	356	+	intergenic	exon	NA	NA	5	m	ENST00000400755	NONCO386	TSS4149	TCONS_00004937	r
chr1	142618795	142618856	62	+	intergenic	exon	NA	NA	1	m	ENST00000412092	NONCO386	TSS4149	TCONS_00004938	.
chr1	142621001	142621538	538	+	intergenic	exon	NA	NA	2	m	ENST00000412092	NONCO386	TSS4149	TCONS_00004938	.
chr1	142619123	142619579	457	+	intergenic	exon	NA	NA	1	m	ENST00000426408	NONCO386	TSS4150	TCONS_00004940	.
chr1	142621001	142621059	59	+	intergenic	exon	NA	NA	2	m	ENST00000426408	NONCO386	TSS4150	TCONS_00004940	.
chr1	142665419	142665640	222	+	intergenic	exon	NA	NA	3	m	ENST00000426408	NONCO386	TSS4150	TCONS_00004940	.
chr1	142619123	142619579	457	+	intergenic	exon	NA	NA	1	m	ENST00000411746	NONCO386	TSS4150	TCONS_00004941	.
chr1	142621001	142621059	59	+	intergenic	exon	NA	NA	2	m	ENST00000411746	NONCO386	TSS4150	TCONS_00004941	.
chr1	142724179	142724266	88	+	intergenic	exon	NA	NA	3	m	ENST00000411746	NONCO386	TSS4150	TCONS_00004941	.
chr1	142729931	142729975	45	+	intergenic	exon	NA	NA	4	m	ENST00000411746	NONCO386	TSS4150	TCONS_00004941	.
chr1	143119061	143119119	59	+	intergenic	exon	NA	NA	1	m	ENST00000454861	NONCO389	TSS4168	TCONS_00004953	.
chr1	143156465	143156667	203	+	intergenic	exon	NA	NA	2	m	ENST00000454861	NONCO389	TSS4168	TCONS_00004953	.
chr1	143157110	143158071	962	+	intergenic	exon	NA	NA	3	m	ENST00000454861	NONCO389	TSS4168	TCONS_00004953	.
chr1	143119061	143119119	59	+	intergenic	exon	NA	NA	1	m	ENST00000447407	NONCO389	TSS4168	TCONS_00004954	.
chr1	143220634	143220721	88	+	intergenic	exon	NA	NA	2	m	ENST00000447407	NONCO389	TSS4168	TCONS_00004954	.
chr1	143226359	143226403	45	+	intergenic	exon	NA	NA	3	m	ENST00000447407	NONCO389	TSS4168	TCONS_00004954	.
chr1	143231294	143231756	463	+	intergenic	exon	NA	NA	4	m	ENST00000447407	NONCO389	TSS4168	TCONS_00004954	.
chr1	143119061	143119119	59	+	intergenic	exon	NA	NA	1	m	ENST00000428930	NONCO389	TSS4168	TCONS_00004956	.
chr1	143231279	143231561	283	+	intergenic	exon	NA	NA	2	m	ENST00000428930	NONCO389	TSS4168	TCONS_00004956	.
chr1	143232047	143232318	272	+	intergenic	exon	NA	NA	3	m	ENST00000428930	NONCO389	TSS4168	TCONS_00004956	.
chr1	143119061	143119119	59	+	intergenic	exon	NA	NA	1	m	ENST00000438000	NONCO389	TSS4168	TCONS_00004957	.
chr1	143220634	143220721	88	+	intergenic	exon	NA	NA	2	m	ENST00000438000	NONCO389	TSS4168	TCONS_00004957	.
chr1	143231294	143231561	268	+	intergenic	exon	NA	NA	3	m	ENST00000438000	NONCO389	TSS4168	TCONS_00004957	.
chr1	143232047	143233417	1371	+	intergenic	exon	NA	NA	4	m	ENST00000438000	NONCO389	TSS4168	TCONS_00004957	.
chr1	4631608	4631689	82	+	intergenic	exon	NA	NA	1	m	ENST00000420522	NONCO39	TSS389	TCONS_00000433	r
chr1	4632530	4632652	123	+	intergenic	exon	NA	NA	2	m	ENST00000420522	NONCO39	TSS389	TCONS_00000433	r
chr1	4642337	4642634	298	+	intergenic	exon	NA	NA	3	m	ENST00000420522	NONCO39	TSS389	TCONS_00000433	r
chr1	4643143	4643238	96	+	intergenic	exon	NA	NA	4	m	ENST00000420522	NONCO39	TSS389	TCONS_00000433	r
chr1	4643399	4643481	83	+	intergenic	exon	NA	NA	5	m	ENST00000420522	NONCO39	TSS389	TCONS_00000433	r
chr1	143154493	143154871	379	+	intergenic	exon	NA	NA	1	m	ENST00000424474	NONCO390	TSS4169	TCONS_00004958	r
chr1	143169492	143169717	226	+	intergenic	exon	NA	NA	2	m	ENST00000424474	NONCO390	TSS4169	TCONS_00004958	r
chr1	143188828	143189024	197	+	intergenic	exon	NA	NA	1	m	ENST00000425124	NONCO392	TSS4173	TCONS_00004962	.
chr1	143189423	143189695	273	+	intergenic	exon	NA	NA	2	m	ENST00000425124	NONCO392	TSS4173	TCONS_00004962	.
chr1	143498344	143498510	167	+	intergenic	exon	NA	NA	1	m	ENST00000429884	NONCO393	TSS4199	TCONS_00004989	r
chr1	143509040	143509087	48	+	intergenic	exon	NA	NA	2	m	ENST00000429884	NONCO393	TSS4199	TCONS_00004989	r
chr1	143516484	143516584	101	+	intergenic	exon	NA	NA	3	m	ENST00000429884	NONCO393	TSS4199	TCONS_00004989	r
chr1	143517254	143517299	46	+	intergenic	exon	NA	NA	4	m	ENST00000429884	NONCO393	TSS4199	TCONS_00004989	r
chr1	145096220	145096621	402	+	intergenic	exon	NA	NA	1	m	Human-IGR39-R1.tophat.25258.2	NONCO398	TSS4242	TCONS_00005043	.
chr1	145103908	145104017	110	+	intergenic	exon	NA	NA	2	m	Human-IGR39-R1.tophat.25258.2	NONCO398	TSS4242	TCONS_00005043	.
chr1	145109524	145109684	161	+	intergenic	exon	NA	NA	3	m	Human-IGR39-R1.tophat.25258.2	NONCO398	TSS4242	TCONS_00005043	.
chr1	145112373	145112519	147	+	intergenic	exon	NA	NA	4	m	Human-IGR39-R1.tophat.25258.2	NONCO398	TSS4242	TCONS_00005043	.
chr1	145115735	145117736	2002	+	intergenic	exon	NA	NA	5	m	Human-IGR39-R1.tophat.25258.2	NONCO398	TSS4242	TCONS_00005043	.
chr1	145096531	145096621	91	+	intergenic	exon	NA	NA	1	m	ENST00000500203	NONCO398	TSS4243	TCONS_00005044	r
chr1	145100206	145100260	55	+	intergenic	exon	NA	NA	2	m	ENST00000500203	NONCO398	TSS4243	TCONS_00005044	r
chr1	145100692	145100984	293	+	intergenic	exon	NA	NA	3	m	ENST00000500203	NONCO398	TSS4243	TCONS_00005044	r
chr1	145952372	145952520	149	+	intergenic	exon	NA	NA	1	m	ENST00000428782	NONCO399	TSS4295	TCONS_00005113	.
chr1	145955052	145955241	190	+	intergenic	exon	NA	NA	2	m	ENST00000428782	NONCO399	TSS4295	TCONS_00005113	.
chr1	145956299	145956451	153	+	intergenic	exon	NA	NA	3	m	ENST00000428782	NONCO399	TSS4295	TCONS_00005113	.
chr1	459656	459992	337	+	intergenic	exon	NA	NA	1	m	ENST00000441866	NONCO4	TSS29	TCONS_00000029	.
chr1	461154	461288	135	+	intergenic	exon	NA	NA	2	m	ENST00000441866	NONCO4	TSS29	TCONS_00000029	.
chr1	461751	461954	204	+	intergenic	exon	NA	NA	3	m	ENST00000441866	NONCO4	TSS29	TCONS_00000029	.
chr1	146790828	146791539	712	+	intergenic	exon	NA	NA	1	m	ENST00000435270	NONCO401	TSS4327	TCONS_00005146	.
chr1	146791695	146791942	248	+	intergenic	exon	NA	NA	2	m	ENST00000435270	NONCO401	TSS4327	TCONS_00005146	.
chr1	147169914	147169969	56	+	intergenic	exon	NA	NA	1	m	ENST00000431525	NONCO402	TSS4334	TCONS_00005153	.
chr1	147171072	147171461	390	+	intergenic	exon	NA	NA	2	m	ENST00000431525	NONCO402	TSS4334	TCONS_00005153	.
chr1	147249700	147249833	134	+	antisense_upstream	exon	NA	NA	1	m	ENST00000426504	NONCO404	TSS4336	TCONS_00005155	r
chr1	147260720	147261065	346	+	antisense_upstream	exon	NA	NA	2	m	ENST00000426504	NONCO404	TSS4336	TCONS_00005155	r
chr1	147494090	147494238	149	+	intergenic	exon	NA	NA	1	m	ENST00000446766	NONCO405	TSS4344	TCONS_00005167	.
chr1	147496770	147496959	190	+	intergenic	exon	NA	NA	2	m	ENST00000446766	NONCO405	TSS4344	TCONS_00005167	.
chr1	147498018	147498172	155	+	intergenic	exon	NA	NA	3	m	ENST00000446766	NONCO405	TSS4344	TCONS_00005167	.
chr1	147496676	147496959	284	+	intergenic	exon	NA	NA	1	m	ENST00000422157	NONCO405	TSS4345	TCONS_00005168	.
chr1	147498018	147498172	155	+	intergenic	exon	NA	NA	2	m	ENST00000422157	NONCO405	TSS4345	TCONS_00005168	.
chr1	147634989	147635271	283	+	antisense_upstream	exon	NA	NA	1	m	ENST00000432038	NONCO406	TSS4350	TCONS_00005173	.
chr1	147635386	147635692	307	+	antisense_upstream	exon	NA	NA	2	m	ENST00000432038	NONCO406	TSS4350	TCONS_00005173	.
chr1	147635092	147635271	180	+	antisense_upstream	exon	NA	NA	1	m	ENST00000411978	NONCO406	TSS4351	TCONS_00005174	.
chr1	147635421	147635692	272	+	antisense_upstream	exon	NA	NA	2	m	ENST00000411978	NONCO406	TSS4351	TCONS_00005174	.
chr1	147635156	147635867	712	+	antisense_upstream	exon	NA	NA	1	m	ENST00000594189	NONCO406	TSS4351	TCONS_00005175	.
chr1	147636071	147636119	49	+	antisense_upstream	exon	NA	NA	2	m	ENST00000594189	NONCO406	TSS4351	TCONS_00005175	.
chr1	147635156	147635271	116	+	antisense_upstream	exon	NA	NA	1	m	ENST00000594699	NONCO406	TSS4351	TCONS_00005176	.
chr1	147636036	147636145	110	+	antisense_upstream	exon	NA	NA	2	m	ENST00000594699	NONCO406	TSS4351	TCONS_00005176	.
chr1	147636539	147636867	329	+	antisense_upstream	exon	NA	NA	3	m	ENST00000594699	NONCO406	TSS4351	TCONS_00005176	.
chr1	147635156	147635271	116	+	antisense_upstream	exon	NA	NA	1	m	ENST00000595367	NONCO406	TSS4351	TCONS_00005177	r
chr1	147636036	147636145	110	+	antisense_upstream	exon	NA	NA	2	m	ENST00000595367	NONCO406	TSS4351	TCONS_00005177	r
chr1	147646528	147647136	609	+	antisense_upstream	exon	NA	NA	3	m	ENST00000595367	NONCO406	TSS4351	TCONS_00005177	r
chr1	147635156	147635271	116	+	antisense_upstream	exon	NA	NA	1	m	ENST00000597931	NONCO406	TSS4351	TCONS_00005178	r
chr1	147636036	147636094	59	+	antisense_upstream	exon	NA	NA	2	m	ENST00000597931	NONCO406	TSS4351	TCONS_00005178	r
chr1	147646528	147647162	635	+	antisense_upstream	exon	NA	NA	3	m	ENST00000597931	NONCO406	TSS4351	TCONS_00005178	r
chr1	147635156	147635271	116	+	antisense_upstream	exon	NA	NA	1	m	ENST00000599864	NONCO406	TSS4351	TCONS_00005179	r
chr1	147636071	147636145	75	+	antisense_upstream	exon	NA	NA	2	m	ENST00000599864	NONCO406	TSS4351	TCONS_00005179	r
chr1	147646528	147647175	648	+	antisense_upstream	exon	NA	NA	3	m	ENST00000599864	NONCO406	TSS4351	TCONS_00005179	r
chr1	147635156	147635271	116	+	antisense_upstream	exon	NA	NA	1	m	ENST00000595668	NONCO406	TSS4351	TCONS_00005180	r
chr1	147646528	147647206	679	+	antisense_upstream	exon	NA	NA	2	m	ENST00000595668	NONCO406	TSS4351	TCONS_00005180	r
chr1	147635156	147635271	116	+	antisense_upstream	exon	NA	NA	1	m	ENST00000598757	NONCO406	TSS4351	TCONS_00005181	r
chr1	147636071	147636145	75	+	antisense_upstream	exon	NA	NA	2	m	ENST00000598757	NONCO406	TSS4351	TCONS_00005181	r
chr1	147658442	147658907	466	+	antisense_upstream	exon	NA	NA	3	m	ENST00000598757	NONCO406	TSS4351	TCONS_00005181	r
chr1	147767287	147767403	117	+	intergenic	exon	NA	NA	1	m	ENST00000427169	NONCO409	TSS4357	TCONS_00005187	.
chr1	147767863	147769663	1801	+	intergenic	exon	NA	NA	2	m	ENST00000427169	NONCO409	TSS4357	TCONS_00005187	.
chr1	147801124	147801487	364	+	intergenic	exon	NA	NA	1	m	ENST00000452996	NONCO410	TSS4358	TCONS_00005188	.
chr1	147801651	147802209	559	+	intergenic	exon	NA	NA	2	m	ENST00000452996	NONCO410	TSS4358	TCONS_00005188	.
chr1	147816357	147816764	408	+	intergenic	exon	NA	NA	3	m	ENST00000452996	NONCO410	TSS4358	TCONS_00005188	.
chr1	147887350	147887560	211	+	intergenic	exon	NA	NA	1	m	ENST00000426101	NONCO411	TSS4359	TCONS_00005189	.
chr1	147892520	147892755	236	+	intergenic	exon	NA	NA	2	m	ENST00000426101	NONCO411	TSS4359	TCONS_00005189	.
chr1	147892968	147893085	118	+	intergenic	exon	NA	NA	3	m	ENST00000426101	NONCO411	TSS4359	TCONS_00005189	.
chr1	147896211	147896337	127	+	intergenic	exon	NA	NA	4	m	ENST00000426101	NONCO411	TSS4359	TCONS_00005189	.
chr1	147896775	147896826	52	+	intergenic	exon	NA	NA	5	m	ENST00000426101	NONCO411	TSS4359	TCONS_00005189	.
chr1	147900876	147901125	250	+	intergenic	exon	NA	NA	6	m	ENST00000426101	NONCO411	TSS4359	TCONS_00005189	.
chr1	147887350	147887560	211	+	intergenic	exon	NA	NA	1	m	ENST00000445243	NONCO411	TSS4359	TCONS_00005190	.
chr1	147892520	147892755	236	+	intergenic	exon	NA	NA	2	m	ENST00000445243	NONCO411	TSS4359	TCONS_00005190	.
chr1	147896775	147896826	52	+	intergenic	exon	NA	NA	3	m	ENST00000445243	NONCO411	TSS4359	TCONS_00005190	.
chr1	147897498	147897812	315	+	intergenic	exon	NA	NA	4	m	ENST00000445243	NONCO411	TSS4359	TCONS_00005190	.
chr1	147899983	147900090	108	+	intergenic	exon	NA	NA	5	m	ENST00000445243	NONCO411	TSS4359	TCONS_00005190	.
chr1	147900876	147901508	633	+	intergenic	exon	NA	NA	6	m	ENST00000445243	NONCO411	TSS4359	TCONS_00005190	.
chr1	148542873	148543109	237	+	intergenic	exon	NA	NA	1	m	ENST00000440916	NONCO412	TSS4364	TCONS_00005195	.
chr1	148545102	148545128	27	+	intergenic	exon	NA	NA	2	m	ENST00000440916	NONCO412	TSS4364	TCONS_00005195	.
chr1	148852393	148852534	142	+	intergenic	exon	NA	NA	1	m	ENST00000456469	NONCO415	TSS4378	TCONS_00005210	.
chr1	148853356	148853432	77	+	intergenic	exon	NA	NA	2	m	ENST00000456469	NONCO415	TSS4378	TCONS_00005210	.
chr1	148853529	148853717	189	+	intergenic	exon	NA	NA	3	m	ENST00000456469	NONCO415	TSS4378	TCONS_00005210	.
chr1	148854138	148854161	24	+	intergenic	exon	NA	NA	1	m	ENST00000444424	NONCO415	TSS4380	TCONS_00005211	.
chr1	148873406	148873522	117	+	intergenic	exon	NA	NA	2	m	ENST00000444424	NONCO415	TSS4380	TCONS_00005211	.
chr1	148876278	148876418	141	+	intergenic	exon	NA	NA	3	m	ENST00000444424	NONCO415	TSS4380	TCONS_00005211	.
chr1	148881948	148882049	102	+	intergenic	exon	NA	NA	4	m	ENST00000444424	NONCO415	TSS4380	TCONS_00005211	.
chr1	148882203	148882367	165	+	intergenic	exon	NA	NA	5	m	ENST00000444424	NONCO415	TSS4380	TCONS_00005211	.
chr1	148887618	148887806	189	+	intergenic	exon	NA	NA	6	m	ENST00000444424	NONCO415	TSS4380	TCONS_00005211	.
chr1	148888062	148888229	168	+	intergenic	exon	NA	NA	7	m	ENST00000444424	NONCO415	TSS4380	TCONS_00005211	.
chr1	148889579	148889689	111	+	intergenic	exon	NA	NA	8	m	ENST00000444424	NONCO415	TSS4380	TCONS_00005211	.
chr1	148890193	148890261	69	+	intergenic	exon	NA	NA	9	m	ENST00000444424	NONCO415	TSS4380	TCONS_00005211	.
chr1	148891525	148891740	216	+	intergenic	exon	NA	NA	10	m	ENST00000444424	NONCO415	TSS4380	TCONS_00005211	.
chr1	148928322	148928385	64	+	intergenic	exon	NA	NA	1	m	ENST00000452399	NONCO417	TSS4386	TCONS_00005215	.
chr1	148932786	148932920	135	+	intergenic	exon	NA	NA	2	m	ENST00000452399	NONCO417	TSS4386	TCONS_00005215	.
chr1	148951245	148951594	350	+	intergenic	exon	NA	NA	3	m	ENST00000452399	NONCO417	TSS4386	TCONS_00005215	.
chr1	148928345	148928385	41	+	intergenic	exon	NA	NA	1	m	ENST00000539543	NONCO417	TSS4386	TCONS_00005216	.
chr1	148932786	148932920	135	+	intergenic	exon	NA	NA	2	m	ENST00000539543	NONCO417	TSS4386	TCONS_00005216	.
chr1	148933291	148933368	78	+	intergenic	exon	NA	NA	3	m	ENST00000539543	NONCO417	TSS4386	TCONS_00005216	.
chr1	148951245	148951595	351	+	intergenic	exon	NA	NA	4	m	ENST00000539543	NONCO417	TSS4386	TCONS_00005216	.
chr1	148932785	148932920	136	+	intergenic	exon	NA	NA	1	m	ENST00000457390	NONCO417	TSS4387	TCONS_00005217	.
chr1	148933291	148933579	289	+	intergenic	exon	NA	NA	2	m	ENST00000457390	NONCO417	TSS4387	TCONS_00005217	.
chr1	149230716	149230773	58	+	intergenic	exon	NA	NA	1	m	ENST00000443018	NONCO418	TSS4394	TCONS_00005222	r
chr1	149231540	149232554	1015	+	intergenic	exon	NA	NA	2	m	ENST00000443018	NONCO418	TSS4394	TCONS_00005222	r
chr1	149575482	149575568	87	+	intergenic	exon	NA	NA	1	m	ENST00000417986	NONCO421	TSS4418	TCONS_00005247	.
chr1	149576603	149576700	98	+	intergenic	exon	NA	NA	2	m	ENST00000417986	NONCO421	TSS4418	TCONS_00005247	.
chr1	149615765	149615903	139	+	intergenic	exon	NA	NA	3	m	ENST00000417986	NONCO421	TSS4418	TCONS_00005247	.
chr1	149576149	149576387	239	+	intergenic	exon	NA	NA	1	m	ENST00000593370	NONCO421	TSS4419	TCONS_00005248	.
chr1	149576603	149576700	98	+	intergenic	exon	NA	NA	2	m	ENST00000593370	NONCO421	TSS4419	TCONS_00005248	.
chr1	149577608	149577802	195	+	intergenic	exon	NA	NA	3	m	ENST00000593370	NONCO421	TSS4419	TCONS_00005248	.
chr1	149576181	149576387	207	+	intergenic	exon	NA	NA	1	m	ENST00000434047	NONCO421	TSS4419	TCONS_00005249	.
chr1	149576603	149576700	98	+	intergenic	exon	NA	NA	2	m	ENST00000434047	NONCO421	TSS4419	TCONS_00005249	.
chr1	149615765	149615975	211	+	intergenic	exon	NA	NA	3	m	ENST00000434047	NONCO421	TSS4419	TCONS_00005249	.
chr1	149576450	149576700	251	+	intergenic	exon	NA	NA	1	m	ENST00000444581	NONCO421	TSS4420	TCONS_00005250	.
chr1	149615765	149616783	1019	+	intergenic	exon	NA	NA	2	m	ENST00000444581	NONCO421	TSS4420	TCONS_00005250	.
chr1	149576472	149576700	229	+	intergenic	exon	NA	NA	1	m	ENST00000455295	NONCO421	TSS4420	TCONS_00005251	.
chr1	149591078	149591238	161	+	intergenic	exon	NA	NA	2	m	ENST00000455295	NONCO421	TSS4420	TCONS_00005251	.
chr1	149576491	149576700	210	+	intergenic	exon	NA	NA	1	m	ENST00000453293	NONCO421	TSS4420	TCONS_00005252	.
chr1	149580746	149581061	316	+	intergenic	exon	NA	NA	2	m	ENST00000453293	NONCO421	TSS4420	TCONS_00005252	.
chr1	149576555	149576700	146	+	intergenic	exon	NA	NA	1	m	ENST00000443884	NONCO421	TSS4421	TCONS_00005253	.
chr1	149615765	149616111	347	+	intergenic	exon	NA	NA	2	m	ENST00000443884	NONCO421	TSS4421	TCONS_00005253	.
chr1	149616546	149616786	241	+	intergenic	exon	NA	NA	3	m	ENST00000443884	NONCO421	TSS4421	TCONS_00005253	.
chr1	149576633	149576700	68	+	intergenic	exon	NA	NA	1	m	ENST00000419105	NONCO421	TSS4421	TCONS_00005254	.
chr1	149577608	149577662	55	+	intergenic	exon	NA	NA	2	m	ENST00000419105	NONCO421	TSS4421	TCONS_00005254	.
chr1	149591078	149591237	160	+	intergenic	exon	NA	NA	3	m	ENST00000419105	NONCO421	TSS4421	TCONS_00005254	.
chr1	149591589	149592306	718	+	intergenic	exon	NA	NA	4	m	ENST00000419105	NONCO421	TSS4421	TCONS_00005254	.
chr1	149576911	149577069	159	+	intergenic	exon	NA	NA	1	m	ENST00000594630	NONCO421	TSS4422	TCONS_00005255	.
chr1	149577608	149577662	55	+	intergenic	exon	NA	NA	2	m	ENST00000594630	NONCO421	TSS4422	TCONS_00005255	.
chr1	149580804	149580997	194	+	intergenic	exon	NA	NA	3	m	ENST00000594630	NONCO421	TSS4422	TCONS_00005255	.
chr1	149581512	149581550	39	+	intergenic	exon	NA	NA	4	m	ENST00000594630	NONCO421	TSS4422	TCONS_00005255	.
chr1	149605640	149605867	228	+	intergenic	exon	NA	NA	1	m	ENST00000414422	NONCO421	TSS4424	TCONS_00005257	.
chr1	149632456	149632691	236	+	intergenic	exon	NA	NA	2	m	ENST00000414422	NONCO421	TSS4424	TCONS_00005257	.
chr1	149632904	149633208	305	+	intergenic	exon	NA	NA	3	m	ENST00000414422	NONCO421	TSS4424	TCONS_00005257	.
chr1	149605701	149605844	144	+	intergenic	exon	NA	NA	1	m	ENST00000457991	NONCO421	TSS4424	TCONS_00005258	.
chr1	149615765	149616111	347	+	intergenic	exon	NA	NA	2	m	ENST00000457991	NONCO421	TSS4424	TCONS_00005258	.
chr1	149616546	149616657	112	+	intergenic	exon	NA	NA	3	m	ENST00000457991	NONCO421	TSS4424	TCONS_00005258	.
chr1	149626959	149627107	149	+	intergenic	exon	NA	NA	1	m	ENST00000600072	NONCO421	TSS4425	TCONS_00005259	.
chr1	149629755	149629857	103	+	intergenic	exon	NA	NA	2	m	ENST00000600072	NONCO421	TSS4425	TCONS_00005259	.
chr1	149632456	149632691	236	+	intergenic	exon	NA	NA	3	m	ENST00000600072	NONCO421	TSS4425	TCONS_00005259	.
chr1	149636123	149636207	85	+	intergenic	exon	NA	NA	4	m	ENST00000600072	NONCO421	TSS4425	TCONS_00005259	.
chr1	149627007	149627107	101	+	intergenic	exon	NA	NA	1	m	ENST00000439906	NONCO421	TSS4425	TCONS_00005260	.
chr1	149632456	149632691	236	+	intergenic	exon	NA	NA	2	m	ENST00000439906	NONCO421	TSS4425	TCONS_00005260	.
chr1	149636123	149636159	37	+	intergenic	exon	NA	NA	3	m	ENST00000439906	NONCO421	TSS4425	TCONS_00005260	.
chr1	149627341	149627518	178	+	intergenic	exon	NA	NA	1	m	ENST00000598642	NONCO421	TSS4426	TCONS_00005261	.
chr1	149629757	149629857	101	+	intergenic	exon	NA	NA	2	m	ENST00000598642	NONCO421	TSS4426	TCONS_00005261	.
chr1	149632456	149632691	236	+	intergenic	exon	NA	NA	3	m	ENST00000598642	NONCO421	TSS4426	TCONS_00005261	.
chr1	149636684	149636735	52	+	intergenic	exon	NA	NA	4	m	ENST00000598642	NONCO421	TSS4426	TCONS_00005261	.
chr1	149637498	149637707	210	+	intergenic	exon	NA	NA	5	m	ENST00000598642	NONCO421	TSS4426	TCONS_00005261	.
chr1	149636144	149636247	104	+	intergenic	exon	NA	NA	1	m	ENST00000430052	NONCO421	TSS4427	TCONS_00005262	.
chr1	149636445	149636583	139	+	intergenic	exon	NA	NA	2	m	ENST00000430052	NONCO421	TSS4427	TCONS_00005262	.
chr1	149636684	149636930	247	+	intergenic	exon	NA	NA	3	m	ENST00000430052	NONCO421	TSS4427	TCONS_00005262	.
chr1	6784697	6784910	214	+	intergenic	exon	NA	NA	1	m	ENST00000432429	NONCO43	TSS450	TCONS_00000506	r
chr1	6785997	6787468	1472	+	intergenic	exon	NA	NA	2	m	ENST00000432429	NONCO43	TSS450	TCONS_00000506	r
chr1	6784697	6784910	214	+	intergenic	exon	NA	NA	1	m	ENST00000414210	NONCO43	TSS450	TCONS_00000507	.
chr1	6789780	6790072	293	+	intergenic	exon	NA	NA	2	m	ENST00000414210	NONCO43	TSS450	TCONS_00000507	.
chr1	6787587	6787672	86	+	intergenic	exon	NA	NA	1	m	ENST00000421469	NONCO43	TSS451	TCONS_00000508	.
chr1	6789780	6790072	293	+	intergenic	exon	NA	NA	2	m	ENST00000421469	NONCO43	TSS451	TCONS_00000508	.
chr1	152095010	152095132	123	+	intergenic	exon	NA	NA	1	m	ENST00000429230	NONCO438	TSS4620	TCONS_00005541	.
chr1	152096876	152097541	666	+	intergenic	exon	NA	NA	2	m	ENST00000429230	NONCO438	TSS4620	TCONS_00005541	.
chr1	152178334	152178531	198	+	intergenic	exon	NA	NA	1	m	ENST00000429352	NONCO440	TSS4626	TCONS_00005545	.
chr1	152179335	152179533	199	+	intergenic	exon	NA	NA	2	m	ENST00000429352	NONCO440	TSS4626	TCONS_00005545	.
chr1	152627953	152628023	71	+	intergenic	exon	NA	NA	1	m	ENST00000536536	NONCO442	TSS4634	TCONS_00005556	.
chr1	152628787	152628814	28	+	intergenic	exon	NA	NA	2	m	ENST00000536536	NONCO442	TSS4634	TCONS_00005556	.
chr1	152629075	152629266	192	+	intergenic	exon	NA	NA	3	m	ENST00000536536	NONCO442	TSS4634	TCONS_00005556	.
chr1	152627953	152628023	71	+	intergenic	exon	NA	NA	1	m	ENST00000444515	NONCO442	TSS4634	TCONS_00005557	.
chr1	152628787	152628812	26	+	intergenic	exon	NA	NA	2	m	ENST00000444515	NONCO442	TSS4634	TCONS_00005557	.
chr1	152629076	152629280	205	+	intergenic	exon	NA	NA	3	m	ENST00000444515	NONCO442	TSS4634	TCONS_00005557	.
chr1	153146994	153147121	128	+	intergenic	exon	NA	NA	1	m	ENST00000427145	NONCO443	TSS4661	TCONS_00005588	.
chr1	153148589	153149116	528	+	intergenic	exon	NA	NA	2	m	ENST00000427145	NONCO443	TSS4661	TCONS_00005588	.
chr1	153162555	153164152	1598	+	intergenic	exon	NA	NA	3	m	ENST00000427145	NONCO443	TSS4661	TCONS_00005588	.
chr1	8086798	8087481	684	+	antisense_upstream	exon	NA	NA	1	m	ENST00000445300	NONCO45	TSS482	TCONS_00000552	r
chr1	8089287	8089417	131	+	antisense_upstream	exon	NA	NA	2	m	ENST00000445300	NONCO45	TSS482	TCONS_00000552	r
chr1	8181534	8182762	1229	+	antisense_upstream	exon	NA	NA	3	m	ENST00000445300	NONCO45	TSS482	TCONS_00000552	r
chr1	155556435	155556494	60	+	intergenic	exon	NA	NA	1	m	ENST00000441522	NONCO451	TSS4835	TCONS_00005888	.
chr1	155568614	155568706	93	+	intergenic	exon	NA	NA	2	m	ENST00000441522	NONCO451	TSS4835	TCONS_00005888	.
chr1	155571864	155571988	125	+	intergenic	exon	NA	NA	3	m	ENST00000441522	NONCO451	TSS4835	TCONS_00005888	.
chr1	157155178	157155203	26	+	intergenic	exon	NA	NA	1	m	ENST00000457239	NONCO455	TSS4967	TCONS_00006101	.
chr1	157156751	157157195	445	+	intergenic	exon	NA	NA	2	m	ENST00000457239	NONCO455	TSS4967	TCONS_00006101	.
chr1	157250506	157250643	138	+	intergenic	exon	NA	NA	1	m	ENST00000607010	NONCO456	TSS4968	TCONS_00006102	r
chr1	157252368	157252858	491	+	intergenic	exon	NA	NA	2	m	ENST00000607010	NONCO456	TSS4968	TCONS_00006102	r
chr1	157894855	157895134	280	+	intergenic	exon	NA	NA	1	m	ENST00000454878	NONCO458	TSS4972	TCONS_00006106	.
chr1	157895551	157895830	280	+	intergenic	exon	NA	NA	2	m	ENST00000454878	NONCO458	TSS4972	TCONS_00006106	.
chr1	157899319	157899652	334	+	intergenic	exon	NA	NA	3	m	ENST00000454878	NONCO458	TSS4972	TCONS_00006106	.
chr1	157895764	157895834	71	+	intergenic	exon	NA	NA	1	m	ENST00000452528	NONCO458	TSS4973	TCONS_00006107	.
chr1	157899321	157899581	261	+	intergenic	exon	NA	NA	2	m	ENST00000452528	NONCO458	TSS4973	TCONS_00006107	.
chr1	157915446	157915551	106	+	intergenic	exon	NA	NA	3	m	ENST00000452528	NONCO458	TSS4973	TCONS_00006107	.
chr1	157918259	157918861	603	+	intergenic	exon	NA	NA	4	m	ENST00000452528	NONCO458	TSS4973	TCONS_00006107	.
chr1	157899321	157899581	261	+	intergenic	exon	NA	NA	1	m	ENST00000422062	NONCO458	TSS4974	TCONS_00006108	.
chr1	157912454	157912986	533	+	intergenic	exon	NA	NA	2	m	ENST00000422062	NONCO458	TSS4974	TCONS_00006108	.
chr1	8249884	8250391	508	+	intergenic	exon	NA	NA	1	m	ENST00000453364	NONCO46	TSS483	TCONS_00000553	.
chr1	8251276	8251555	280	+	intergenic	exon	NA	NA	2	m	ENST00000453364	NONCO46	TSS483	TCONS_00000553	.
chr1	8252242	8252314	73	+	intergenic	exon	NA	NA	3	m	ENST00000453364	NONCO46	TSS483	TCONS_00000553	.
chr1	8252617	8252830	214	+	intergenic	exon	NA	NA	4	m	ENST00000453364	NONCO46	TSS483	TCONS_00000553	.
chr1	159436111	159436413	303	+	intergenic	exon	NA	NA	1	m	ENST00000412932	NONCO460	TSS5031	TCONS_00006186	.
chr1	159437870	159437946	77	+	intergenic	exon	NA	NA	2	m	ENST00000412932	NONCO460	TSS5031	TCONS_00006186	.
chr1	159452694	159453166	473	+	intergenic	exon	NA	NA	3	m	ENST00000412932	NONCO460	TSS5031	TCONS_00006186	.
chr1	159527158	159527220	63	+	intergenic	exon	NA	NA	1	m	ENST00000435442	NONCO461	TSS5032	TCONS_00006187	.
chr1	159527388	159527990	603	+	intergenic	exon	NA	NA	2	m	ENST00000435442	NONCO461	TSS5032	TCONS_00006187	.
chr1	159931008	159931195	188	+	intergenic	exon	NA	NA	1	m	ENST00000443364	NONCO464	TSS5063	TCONS_00006212	.
chr1	159935289	159935435	147	+	intergenic	exon	NA	NA	2	m	ENST00000443364	NONCO464	TSS5063	TCONS_00006212	.
chr1	159946434	159946902	469	+	intergenic	exon	NA	NA	3	m	ENST00000443364	NONCO464	TSS5063	TCONS_00006212	.
chr1	159931014	159931195	182	+	intergenic	exon	NA	NA	1	m	ENST00000423943	NONCO464	TSS5063	TCONS_00006213	.
chr1	159946434	159946902	469	+	intergenic	exon	NA	NA	2	m	ENST00000423943	NONCO464	TSS5063	TCONS_00006213	.
chr1	159948390	159948851	462	+	intergenic	exon	NA	NA	3	m	ENST00000423943	NONCO464	TSS5063	TCONS_00006213	.
chr1	8268732	8268933	202	+	intergenic	exon	NA	NA	1	m	ENST00000452982	NONCO47	TSS484	TCONS_00000554	.
chr1	8270547	8270655	109	+	intergenic	exon	NA	NA	2	m	ENST00000452982	NONCO47	TSS484	TCONS_00000554	.
chr1	8274685	8274738	54	+	intergenic	exon	NA	NA	3	m	ENST00000452982	NONCO47	TSS484	TCONS_00000554	.
chr1	8275139	8275270	132	+	intergenic	exon	NA	NA	4	m	ENST00000452982	NONCO47	TSS484	TCONS_00000554	.
chr1	161337812	161338949	1138	+	antisense_upstream	exon	NA	NA	1	m	ENST00000437833	NONCO471	TSS5181	TCONS_00006395	r
chr1	161341086	161341754	669	+	antisense_upstream	exon	NA	NA	2	m	ENST00000437833	NONCO471	TSS5181	TCONS_00006395	r
chr1	162008806	162009033	228	+	intergenic	exon	NA	NA	1	m	ENST00000430905	NONCO476	TSS5234	TCONS_00006472	.
chr1	162009133	162009357	225	+	intergenic	exon	NA	NA	2	m	ENST00000430905	NONCO476	TSS5234	TCONS_00006472	.
chr1	162794585	162794786	202	+	antisense_downstream	exon	NA	NA	1	m	ENST00000451015	NONCO478	TSS5268	TCONS_00006516	.
chr1	162798893	162799007	115	+	antisense_downstream	exon	NA	NA	2	m	ENST00000451015	NONCO478	TSS5268	TCONS_00006516	.
chr1	162802340	162802517	178	+	antisense_downstream	exon	NA	NA	3	m	ENST00000451015	NONCO478	TSS5268	TCONS_00006516	.
chr1	162808925	162809006	82	+	antisense_downstream	exon	NA	NA	4	m	ENST00000451015	NONCO478	TSS5268	TCONS_00006516	.
chr1	162810653	162810704	52	+	antisense_downstream	exon	NA	NA	5	m	ENST00000451015	NONCO478	TSS5268	TCONS_00006516	.
chr1	162813926	162813944	19	+	antisense_downstream	exon	NA	NA	6	m	ENST00000451015	NONCO478	TSS5268	TCONS_00006516	.
chr1	162819227	162819257	31	+	antisense_downstream	exon	NA	NA	7	m	ENST00000451015	NONCO478	TSS5268	TCONS_00006516	.
chr1	163207004	163207156	153	+	intergenic	exon	NA	NA	1	m	ENST00000450164	NONCO480	TSS5277	TCONS_00006528	.
chr1	163207502	163207833	332	+	intergenic	exon	NA	NA	2	m	ENST00000450164	NONCO480	TSS5277	TCONS_00006528	.
chr1	163208287	163208468	182	+	intergenic	exon	NA	NA	3	m	ENST00000450164	NONCO480	TSS5277	TCONS_00006528	.
chr1	163208522	163208987	466	+	intergenic	exon	NA	NA	4	m	ENST00000450164	NONCO480	TSS5277	TCONS_00006528	.
chr1	163229640	163229998	359	+	intergenic	exon	NA	NA	1	m	ENST00000416401	NONCO481	TSS5278	TCONS_00006529	.
chr1	163230340	163230449	110	+	intergenic	exon	NA	NA	2	m	ENST00000416401	NONCO481	TSS5278	TCONS_00006529	.
chr1	165567700	165567921	222	+	intergenic	exon	NA	NA	1	m	ENST00000452618	NONCO486	TSS5318	TCONS_00006574	.
chr1	165574833	165574925	93	+	intergenic	exon	NA	NA	2	m	ENST00000452618	NONCO486	TSS5318	TCONS_00006574	.
chr1	165590755	165590844	90	+	intergenic	exon	NA	NA	3	m	ENST00000452618	NONCO486	TSS5318	TCONS_00006574	.
chr1	165592482	165592568	87	+	intergenic	exon	NA	NA	4	m	ENST00000452618	NONCO486	TSS5318	TCONS_00006574	.
chr1	166304121	166304200	80	+	intergenic	exon	NA	NA	1	m	ENST00000425271	NONCO491	TSS5346	TCONS_00006607	.
chr1	166304565	166304702	138	+	intergenic	exon	NA	NA	2	m	ENST00000425271	NONCO491	TSS5346	TCONS_00006607	.
chr1	166304795	166304999	205	+	intergenic	exon	NA	NA	3	m	ENST00000425271	NONCO491	TSS5346	TCONS_00006607	.
chr1	166443982	166444119	138	+	intergenic	exon	NA	NA	1	m	ENST00000436045	NONCO492	TSS5347	TCONS_00006608	.
chr1	166445373	166445520	148	+	intergenic	exon	NA	NA	2	m	ENST00000436045	NONCO492	TSS5347	TCONS_00006608	.
chr1	166447445	166447600	156	+	intergenic	exon	NA	NA	3	m	ENST00000436045	NONCO492	TSS5347	TCONS_00006608	.
chr1	166450477	166450802	326	+	intergenic	exon	NA	NA	4	m	ENST00000436045	NONCO492	TSS5347	TCONS_00006608	.
chr1	166535415	166535549	135	+	intergenic	exon	NA	NA	1	m	ENST00000540928	NONCO493	TSS5348	TCONS_00006609	.
chr1	166539190	166539378	189	+	intergenic	exon	NA	NA	2	m	ENST00000540928	NONCO493	TSS5348	TCONS_00006609	.
chr1	166539815	166539977	163	+	intergenic	exon	NA	NA	3	m	ENST00000540928	NONCO493	TSS5348	TCONS_00006609	.
chr1	166542872	166543011	140	+	intergenic	exon	NA	NA	4	m	ENST00000540928	NONCO493	TSS5348	TCONS_00006609	.
chr1	166535415	166535549	135	+	intergenic	exon	NA	NA	1	m	ENST00000434461	NONCO493	TSS5348	TCONS_00006610	.
chr1	166539190	166539371	182	+	intergenic	exon	NA	NA	2	m	ENST00000434461	NONCO493	TSS5348	TCONS_00006610	.
chr1	166539815	166539977	163	+	intergenic	exon	NA	NA	3	m	ENST00000434461	NONCO493	TSS5348	TCONS_00006610	.
chr1	166542872	166543014	143	+	intergenic	exon	NA	NA	4	m	ENST00000434461	NONCO493	TSS5348	TCONS_00006610	.
chr1	166543837	166544036	200	+	intergenic	exon	NA	NA	5	m	ENST00000434461	NONCO493	TSS5348	TCONS_00006610	.
chr1	166546535	166546885	351	+	intergenic	exon	NA	NA	6	m	ENST00000434461	NONCO493	TSS5348	TCONS_00006610	.
chr1	166548359	166548437	79	+	intergenic	exon	NA	NA	7	m	ENST00000434461	NONCO493	TSS5348	TCONS_00006610	.
chr1	166549596	166549942	347	+	intergenic	exon	NA	NA	8	m	ENST00000434461	NONCO493	TSS5348	TCONS_00006610	.
chr1	166635122	166635253	132	+	intergenic	exon	NA	NA	1	m	ENST00000455032	NONCO494	TSS5351	TCONS_00006613	.
chr1	166638264	166638452	189	+	intergenic	exon	NA	NA	2	m	ENST00000455032	NONCO494	TSS5351	TCONS_00006613	.
chr1	166638923	166639085	163	+	intergenic	exon	NA	NA	3	m	ENST00000455032	NONCO494	TSS5351	TCONS_00006613	.
chr1	166640948	166641090	143	+	intergenic	exon	NA	NA	4	m	ENST00000455032	NONCO494	TSS5351	TCONS_00006613	.
chr1	166642630	166642829	200	+	intergenic	exon	NA	NA	5	m	ENST00000455032	NONCO494	TSS5351	TCONS_00006613	.
chr1	166644447	166644784	338	+	intergenic	exon	NA	NA	6	m	ENST00000455032	NONCO494	TSS5351	TCONS_00006613	.
chr1	166647691	166647763	73	+	intergenic	exon	NA	NA	7	m	ENST00000455032	NONCO494	TSS5351	TCONS_00006613	.
chr1	166651179	166651433	255	+	intergenic	exon	NA	NA	8	m	ENST00000455032	NONCO494	TSS5351	TCONS_00006613	.
chr1	166732571	166732688	118	+	intergenic	exon	NA	NA	1	m	ENST00000424742	NONCO495	TSS5353	TCONS_00006615	.
chr1	166736807	166737007	201	+	intergenic	exon	NA	NA	2	m	ENST00000424742	NONCO495	TSS5353	TCONS_00006615	.
chr1	166737495	166737560	66	+	intergenic	exon	NA	NA	3	m	ENST00000424742	NONCO495	TSS5353	TCONS_00006615	.
chr1	166737882	166737946	65	+	intergenic	exon	NA	NA	4	m	ENST00000424742	NONCO495	TSS5353	TCONS_00006615	.
chr1	166742041	166742089	49	+	intergenic	exon	NA	NA	5	m	ENST00000424742	NONCO495	TSS5353	TCONS_00006615	.
chr1	166745335	166745406	72	+	intergenic	exon	NA	NA	6	m	ENST00000424742	NONCO495	TSS5353	TCONS_00006615	.
chr1	166745966	166746064	99	+	intergenic	exon	NA	NA	7	m	ENST00000424742	NONCO495	TSS5353	TCONS_00006615	.
chr1	166755156	166755496	341	+	intergenic	exon	NA	NA	8	m	ENST00000424742	NONCO495	TSS5353	TCONS_00006615	.
chr1	166759387	166759437	51	+	intergenic	exon	NA	NA	9	m	ENST00000424742	NONCO495	TSS5353	TCONS_00006615	.
chr1	166761697	166762004	308	+	intergenic	exon	NA	NA	10	m	ENST00000424742	NONCO495	TSS5353	TCONS_00006615	.
chr1	167488773	167488862	90	+	antisense_upstream	exon	NA	NA	1	m	ENST00000457236	NONCO498	TSS5380	TCONS_00006651	.
chr1	167488978	167489823	846	+	antisense_upstream	exon	NA	NA	2	m	ENST00000457236	NONCO498	TSS5380	TCONS_00006651	.
chr1	523009	523081	73	+	intergenic	exon	NA	NA	1	m	ENST00000423796	NONCO5	TSS31	TCONS_00000031	.
chr1	529615	530148	534	+	intergenic	exon	NA	NA	2	m	ENST00000423796	NONCO5	TSS31	TCONS_00000031	.
chr1	523048	523109	62	+	intergenic	exon	NA	NA	1	m	ENST00000450696	NONCO5	TSS31	TCONS_00000032	.
chr1	529615	529954	340	+	intergenic	exon	NA	NA	2	m	ENST00000450696	NONCO5	TSS31	TCONS_00000032	.
chr1	8938894	8939019	126	+	antisense_upstream	exon	NA	NA	1	m	ENST00000442636	NONCO50	TSS498	TCONS_00000566	.
chr1	8939624	8939953	330	+	antisense_upstream	exon	NA	NA	2	m	ENST00000442636	NONCO50	TSS498	TCONS_00000566	.
chr1	168756177	168756466	290	+	intergenic	exon	NA	NA	1	m	ENST00000420691	NONCO500	TSS5418	TCONS_00006700	.
chr1	168758019	168758127	109	+	intergenic	exon	NA	NA	2	m	ENST00000420691	NONCO500	TSS5418	TCONS_00006700	.
chr1	168761569	168762124	556	+	intergenic	exon	NA	NA	3	m	ENST00000420691	NONCO500	TSS5418	TCONS_00006700	.
chr1	170143544	170143847	304	+	intergenic	exon	NA	NA	1	m	ENST00000439184	NONCO504	TSS5450	TCONS_00006732	.
chr1	170196060	170196199	140	+	intergenic	exon	NA	NA	2	m	ENST00000439184	NONCO504	TSS5450	TCONS_00006732	.
chr1	170209371	170209463	93	+	intergenic	exon	NA	NA	3	m	ENST00000439184	NONCO504	TSS5450	TCONS_00006732	.
chr1	170210206	170210428	223	+	intergenic	exon	NA	NA	4	m	ENST00000439184	NONCO504	TSS5450	TCONS_00006732	.
chr1	170567995	170568156	162	+	intergenic	exon	NA	NA	1	m	ENST00000413005	NONCO505	TSS5455	TCONS_00006739	r
chr1	170608250	170608938	689	+	intergenic	exon	NA	NA	2	m	ENST00000413005	NONCO505	TSS5455	TCONS_00006739	r
chr1	170615409	170616480	1072	+	intergenic	exon	NA	NA	3	m	ENST00000413005	NONCO505	TSS5455	TCONS_00006739	r
chr1	172876040	172876392	353	+	intergenic	exon	NA	NA	1	m	ENST00000452366	NONCO509	TSS5527	TCONS_00006841	.
chr1	172876520	172876824	305	+	intergenic	exon	NA	NA	2	m	ENST00000452366	NONCO509	TSS5527	TCONS_00006841	.
chr1	9242263	9242375	113	+	intergenic	exon	NA	NA	1	m	ENST00000412639	NONCO51	TSS504	TCONS_00000577	.
chr1	9243692	9243866	175	+	intergenic	exon	NA	NA	2	m	ENST00000412639	NONCO51	TSS504	TCONS_00000577	.
chr1	9251452	9252148	697	+	intergenic	exon	NA	NA	3	m	ENST00000412639	NONCO51	TSS504	TCONS_00000577	.
chr1	173991647	173991778	132	+	antisense_upstream	exon	NA	NA	1	m	ENST00000424181	NONCO513	TSS5553	TCONS_00006867	.
chr1	173991921	173992123	203	+	antisense_upstream	exon	NA	NA	2	m	ENST00000424181	NONCO513	TSS5553	TCONS_00006867	.
chr1	175846479	175846730	252	+	intergenic	exon	NA	NA	1	m	ENST00000457217	NONCO517	TSS5587	TCONS_00006908	.
chr1	175847951	175849237	1287	+	intergenic	exon	NA	NA	2	m	ENST00000457217	NONCO517	TSS5587	TCONS_00006908	.
chr1	175849335	175849604	270	+	intergenic	exon	NA	NA	3	m	ENST00000457217	NONCO517	TSS5587	TCONS_00006908	.
chr1	176241619	176241675	57	+	intergenic	exon	NA	NA	1	m	ENST00000440296	NONCO520	TSS5593	TCONS_00006912	.
chr1	176241743	176242168	426	+	intergenic	exon	NA	NA	2	m	ENST00000440296	NONCO520	TSS5593	TCONS_00006912	.
chr1	176242227	176242538	312	+	intergenic	exon	NA	NA	3	m	ENST00000440296	NONCO520	TSS5593	TCONS_00006912	.
chr1	177320722	177320786	65	+	intergenic	exon	NA	NA	1	m	ENST00000451341	NONCO521	TSS5600	TCONS_00006921	.
chr1	177325983	177326201	219	+	intergenic	exon	NA	NA	2	m	ENST00000451341	NONCO521	TSS5600	TCONS_00006921	.
chr1	177332575	177332677	103	+	intergenic	exon	NA	NA	3	m	ENST00000451341	NONCO521	TSS5600	TCONS_00006921	.
chr1	177335305	177335408	104	+	intergenic	exon	NA	NA	4	m	ENST00000451341	NONCO521	TSS5600	TCONS_00006921	.
chr1	177669659	177670497	839	+	intergenic	exon	NA	NA	1	m	ENST00000427173	NONCO522	TSS5602	TCONS_00006923	.
chr1	177670594	177670709	116	+	intergenic	exon	NA	NA	2	m	ENST00000427173	NONCO522	TSS5602	TCONS_00006923	.
chr1	177678092	177678260	169	+	intergenic	exon	NA	NA	3	m	ENST00000427173	NONCO522	TSS5602	TCONS_00006923	.
chr1	177678924	177679465	542	+	intergenic	exon	NA	NA	4	m	ENST00000427173	NONCO522	TSS5602	TCONS_00006923	.
chr1	180933647	180933912	266	+	intergenic	exon	NA	NA	1	m	ENST00000503142	NONCO526	TSS5703	TCONS_00007053	.
chr1	180934775	180935045	271	+	intergenic	exon	NA	NA	2	m	ENST00000503142	NONCO526	TSS5703	TCONS_00007053	.
chr1	181143620	181143711	92	+	intergenic	exon	NA	NA	1	m	ENST00000435023	NONCO527	TSS5718	TCONS_00007073	r
chr1	181144473	181144602	130	+	intergenic	exon	NA	NA	2	m	ENST00000435023	NONCO527	TSS5718	TCONS_00007073	r
chr1	181151025	181151344	320	+	intergenic	exon	NA	NA	3	m	ENST00000435023	NONCO527	TSS5718	TCONS_00007073	r
chr1	181144473	181144569	97	+	intergenic	exon	NA	NA	1	m	ENST00000438428	NONCO527	TSS5719	TCONS_00007074	r
chr1	181144846	181144970	125	+	intergenic	exon	NA	NA	2	m	ENST00000438428	NONCO527	TSS5719	TCONS_00007074	r
chr1	181151025	181151343	319	+	intergenic	exon	NA	NA	3	m	ENST00000438428	NONCO527	TSS5719	TCONS_00007074	r
chr1	181205524	181205641	118	+	intergenic	exon	NA	NA	1	m	ENST00000319701	NONCO528	TSS5721	TCONS_00007076	.
chr1	181206768	181206873	106	+	intergenic	exon	NA	NA	2	m	ENST00000319701	NONCO528	TSS5721	TCONS_00007076	.
chr1	181207706	181207740	35	+	intergenic	exon	NA	NA	3	m	ENST00000319701	NONCO528	TSS5721	TCONS_00007076	.
chr1	182055686	182055876	191	+	intergenic	exon	NA	NA	1	m	ENST00000428646	NONCO529	TSS5727	TCONS_00007087	.
chr1	182057406	182057611	206	+	intergenic	exon	NA	NA	2	m	ENST00000428646	NONCO529	TSS5727	TCONS_00007087	.
chr1	182058500	182059247	748	+	intergenic	exon	NA	NA	3	m	ENST00000428646	NONCO529	TSS5727	TCONS_00007087	.
chr1	182376756	182377167	412	+	intergenic	exon	NA	NA	1	m	ENST00000367563	NONCO530	TSS5730	TCONS_00007090	.
chr1	182377663	182377742	80	+	intergenic	exon	NA	NA	2	m	ENST00000367563	NONCO530	TSS5730	TCONS_00007090	.
chr1	182378378	182378495	118	+	intergenic	exon	NA	NA	3	m	ENST00000367563	NONCO530	TSS5730	TCONS_00007090	.
chr1	182383821	182383950	130	+	intergenic	exon	NA	NA	4	m	ENST00000367563	NONCO530	TSS5730	TCONS_00007090	.
chr1	182681997	182682023	27	+	intergenic	exon	NA	NA	1	m	ENST00000435492	NONCO531	TSS5739	TCONS_00007106	.
chr1	182683448	182683679	232	+	intergenic	exon	NA	NA	2	m	ENST00000435492	NONCO531	TSS5739	TCONS_00007106	.
chr1	182702927	182702972	46	+	intergenic	exon	NA	NA	1	m	ENST00000603149	NONCO532	TSS5740	TCONS_00007107	.
chr1	182703553	182703914	362	+	intergenic	exon	NA	NA	2	m	ENST00000603149	NONCO532	TSS5740	TCONS_00007107	.
chr1	184298205	184298308	104	+	intergenic	exon	NA	NA	1	m	ENST00000449525	NONCO535	TSS5798	TCONS_00007169	.
chr1	184301732	184301960	229	+	intergenic	exon	NA	NA	2	m	ENST00000449525	NONCO535	TSS5798	TCONS_00007169	.
chr1	184970659	184970759	101	+	intergenic	exon	NA	NA	1	m	ENST00000566476	NONCO537	TSS5807	TCONS_00007177	r
chr1	184976826	184977815	990	+	intergenic	exon	NA	NA	2	m	ENST00000566476	NONCO537	TSS5807	TCONS_00007177	r
chr1	185624134	185624342	209	+	intergenic	exon	NA	NA	1	m	ENST00000569292	NONCO538	TSS5819	TCONS_00007188	r
chr1	185625609	185626300	692	+	intergenic	exon	NA	NA	2	m	ENST00000569292	NONCO538	TSS5819	TCONS_00007188	r
chr1	187061974	187062078	105	+	intergenic	exon	NA	NA	1	m	ENST00000458683	NONCO540	TSS5844	TCONS_00007218	r
chr1	187272598	187272671	74	+	intergenic	exon	NA	NA	2	m	ENST00000458683	NONCO540	TSS5844	TCONS_00007218	r
chr1	187298123	187298192	70	+	intergenic	exon	NA	NA	3	m	ENST00000458683	NONCO540	TSS5844	TCONS_00007218	r
chr1	187328847	187329455	609	+	intergenic	exon	NA	NA	4	m	ENST00000458683	NONCO540	TSS5844	TCONS_00007218	r
chr1	187412738	187412858	121	+	intergenic	exon	NA	NA	1	m	ENST00000444887	NONCO540	TSS5849	TCONS_00007219	r
chr1	187439203	187439371	169	+	intergenic	exon	NA	NA	2	m	ENST00000444887	NONCO540	TSS5849	TCONS_00007219	r
chr1	187610358	187610401	44	+	intergenic	exon	NA	NA	1	m	ENST00000429725	NONCO541	TSS5852	TCONS_00007223	r
chr1	187610508	187610613	106	+	intergenic	exon	NA	NA	2	m	ENST00000429725	NONCO541	TSS5852	TCONS_00007223	r
chr1	187610750	187612992	2243	+	intergenic	exon	NA	NA	3	m	ENST00000429725	NONCO541	TSS5852	TCONS_00007223	r
chr1	187675692	187675828	137	+	intergenic	exon	NA	NA	1	m	ENST00000424054	NONCO542	TSS5853	TCONS_00007224	.
chr1	187676115	187677179	1065	+	intergenic	exon	NA	NA	2	m	ENST00000424054	NONCO542	TSS5853	TCONS_00007224	.
chr1	187677973	187678029	57	+	intergenic	exon	NA	NA	3	m	ENST00000424054	NONCO542	TSS5853	TCONS_00007224	.
chr1	188477669	188477796	128	+	intergenic	exon	NA	NA	1	m	ENST00000426262	NONCO543	TSS5857	TCONS_00007226	.
chr1	188498327	188498508	182	+	intergenic	exon	NA	NA	2	m	ENST00000426262	NONCO543	TSS5857	TCONS_00007226	.
chr1	188504887	188504989	103	+	intergenic	exon	NA	NA	3	m	ENST00000426262	NONCO543	TSS5857	TCONS_00007226	.
chr1	188505264	188505596	333	+	intergenic	exon	NA	NA	4	m	ENST00000426262	NONCO543	TSS5857	TCONS_00007226	.
chr1	188874819	188875057	239	+	intergenic	exon	NA	NA	1	m	ENST00000445072	NONCO544	TSS5860	TCONS_00007229	r
chr1	189005849	189006393	545	+	intergenic	exon	NA	NA	2	m	ENST00000445072	NONCO544	TSS5860	TCONS_00007229	r
chr1	189744595	189744695	101	+	intergenic	exon	NA	NA	1	m	ENST00000419614	NONCO545	TSS5861	TCONS_00007230	.
chr1	189746390	189746467	78	+	intergenic	exon	NA	NA	2	m	ENST00000419614	NONCO545	TSS5861	TCONS_00007230	.
chr1	189760709	189760893	185	+	intergenic	exon	NA	NA	3	m	ENST00000419614	NONCO545	TSS5861	TCONS_00007230	.
chr1	189783962	189784048	87	+	intergenic	exon	NA	NA	4	m	ENST00000419614	NONCO545	TSS5861	TCONS_00007230	.
chr1	190447681	190447761	81	+	antisense_upstream	exon	NA	NA	1	m	ENST00000436905	NONCO547	TSS5864	TCONS_00007232	.
chr1	190449475	190449865	391	+	antisense_upstream	exon	NA	NA	2	m	ENST00000436905	NONCO547	TSS5864	TCONS_00007232	.
chr1	190448136	190448270	135	+	antisense_upstream	exon	NA	NA	1	m	ENST00000424735	NONCO547	TSS5866	TCONS_00007233	.
chr1	190449475	190449865	391	+	antisense_upstream	exon	NA	NA	2	m	ENST00000424735	NONCO547	TSS5866	TCONS_00007233	.
chr1	190594020	190594163	144	+	intergenic	exon	NA	NA	1	m	ENST00000413356	NONCO548	TSS5868	TCONS_00007235	r
chr1	190707568	190707640	73	+	intergenic	exon	NA	NA	2	m	ENST00000413356	NONCO548	TSS5868	TCONS_00007235	r
chr1	190760644	190760693	50	+	intergenic	exon	NA	NA	3	m	ENST00000413356	NONCO548	TSS5868	TCONS_00007235	r
chr1	190762636	190762726	91	+	intergenic	exon	NA	NA	4	m	ENST00000413356	NONCO548	TSS5868	TCONS_00007235	r
chr1	190768931	190770788	1858	+	intergenic	exon	NA	NA	5	m	ENST00000413356	NONCO548	TSS5868	TCONS_00007235	r
chr1	191844625	191844830	206	+	intergenic	exon	NA	NA	1	m	ENST00000430776	NONCO549	TSS5872	TCONS_00007239	r
chr1	191933524	191933619	96	+	intergenic	exon	NA	NA	2	m	ENST00000430776	NONCO549	TSS5872	TCONS_00007239	r
chr1	191934452	191934543	92	+	intergenic	exon	NA	NA	3	m	ENST00000430776	NONCO549	TSS5872	TCONS_00007239	r
chr1	191945101	191945214	114	+	intergenic	exon	NA	NA	4	m	ENST00000430776	NONCO549	TSS5872	TCONS_00007239	r
chr1	191946369	191946489	121	+	intergenic	exon	NA	NA	5	m	ENST00000430776	NONCO549	TSS5872	TCONS_00007239	r
chr1	191978969	191980390	1422	+	intergenic	exon	NA	NA	6	m	ENST00000430776	NONCO549	TSS5872	TCONS_00007239	r
chr1	192498709	192498845	137	+	intergenic	exon	NA	NA	1	m	ENST00000457321	NONCO550	TSS5879	TCONS_00007248	r
chr1	192499437	192499634	198	+	intergenic	exon	NA	NA	2	m	ENST00000457321	NONCO550	TSS5879	TCONS_00007248	r
chr1	192506884	192507232	349	+	intergenic	exon	NA	NA	3	m	ENST00000457321	NONCO550	TSS5879	TCONS_00007248	r
chr1	192765663	192765873	211	+	intergenic	exon	NA	NA	1	m	ENST00000454090	NONCO551	TSS5884	TCONS_00007259	.
chr1	192766169	192766335	167	+	intergenic	exon	NA	NA	2	m	ENST00000454090	NONCO551	TSS5884	TCONS_00007259	.
chr1	193273875	193274068	194	+	intergenic	exon	NA	NA	1	m	ENST00000420807	NONCO553	TSS5901	TCONS_00007282	.
chr1	193318263	193318405	143	+	intergenic	exon	NA	NA	2	m	ENST00000420807	NONCO553	TSS5901	TCONS_00007282	.
chr1	193320234	193320369	136	+	intergenic	exon	NA	NA	3	m	ENST00000420807	NONCO553	TSS5901	TCONS_00007282	.
chr1	193334778	193335083	306	+	intergenic	exon	NA	NA	4	m	ENST00000420807	NONCO553	TSS5901	TCONS_00007282	.
chr1	193648024	193648135	112	+	intergenic	exon	NA	NA	1	m	ENST00000448412	NONCO554	TSS5902	TCONS_00007283	.
chr1	193694731	193694815	85	+	intergenic	exon	NA	NA	2	m	ENST00000448412	NONCO554	TSS5902	TCONS_00007283	.
chr1	193695962	193696165	204	+	intergenic	exon	NA	NA	3	m	ENST00000448412	NONCO554	TSS5902	TCONS_00007283	.
chr1	194118603	194118986	384	+	intergenic	exon	NA	NA	1	m	ENST00000454538	NONCO555	TSS5903	TCONS_00007284	.
chr1	194166653	194166716	64	+	intergenic	exon	NA	NA	2	m	ENST00000454538	NONCO555	TSS5903	TCONS_00007284	.
chr1	194167441	194167824	384	+	intergenic	exon	NA	NA	3	m	ENST00000454538	NONCO555	TSS5903	TCONS_00007284	.
[truncated: 36,570 more rows]
