# Supplementary material for: The MITF-SOX10 regulated long non-coding RNA DIRC3 is a melanoma tumour suppressor
Source: PLoS Genet. 2019 Dec 27;15(12):e1008501. doi: 10.1371/journal.pgen.1008501 (PMC6934268; doi:10.1371/journal.pgen.1008501)
Supplement: S5 Table — (XLSX) [file pgen.1008501.s009.xlsx]

## Sheet: S5 Table DIRC3_IGFBP5 targets
S5 Table: DIRC3-IGFBP5 shared target genes
gene_name	transcript	baseMean	log2FoldChange	lfcSE	stat	pvalue	padj
B3GALT1	ENST00000392690.3	26.1549	-1.99924	0.424449	-4.7102	2.47474e-06	0.000135125
ITIH6	ENST00000218436.6	53.9881	-1.48904	0.313117	-4.75555	1.97909e-06	0.000110922
MMP17	ENST00000360564.1	88.9508	-1.31631	0.285862	-4.60471	4.13048e-06	0.000209746
TIMP2	ENST00000262768.7	1647.41	-1.25391	0.0664857	-18.8598	2.44095e-79	6.99088e-75
LINC00173	ENST00000480237.1	44.0358	-1.1918	0.30628	-3.89119	9.97519e-05	0.0031087
H19	ENST00000390168.4	362.488	-1.15436	0.133418	-8.65217	5.05286e-18	3.44557e-15
PRKCB	ENST00000321728.7	53.0484	-1.15166	0.30286	-3.80261	0.000143179	0.0041379
NCS1	ENST00000372398.3	48.2501	-1.13298	0.3777	-2.99968	0.00270266	0.0432667
RAB26	ENST00000210187.6	48.6625	-1.10282	0.288633	-3.82084	0.000132999	0.00389875
HIST1H2BH	ENST00000356350.2	76.0833	-1.01009	0.238891	-4.22825	2.35516e-05	0.000925265
SPATS2L	ENST00000409140.3	79.4892	-1.00407	0.28121	-3.57054	0.000356242	0.00849524
NCK2	ENST00000233154.4	158.886	-0.984861	0.183715	-5.36081	8.28511e-08	7.40443e-06
RP11-2E17.1	ENST00000560778.2	201.222	-0.980133	0.16235	-6.03717	1.56845e-09	2.09908e-07
ENGASE	ENST00000539857.2	250.058	-0.965987	0.13288	-7.26964	3.6044e-13	9.38455e-11
FAM120A	ENST00000277165.6	74.8987	-0.964595	0.25631	-3.76339	0.000167623	0.00467451
SGK1	ENST00000489458.2	77.4765	-0.959614	0.25464	-3.76851	0.000164223	0.00460209
SGK1	ENST00000413996.3	165.855	-0.95831	0.161477	-5.93465	2.94472e-09	3.71528e-07
MGAT5	ENST00000468758.1	146.388	-0.931503	0.180068	-5.17307	2.30275e-07	1.74936e-05
LBH	ENST00000395323.3	343.152	-0.90388	0.120321	-7.51221	5.81363e-14	1.79035e-11
SCML4	ENST00000369025.2	146.92	-0.891163	0.185275	-4.80996	1.50961e-06	8.87787e-05
KHDRBS3	ENST00000355849.5	143.325	-0.89044	0.188694	-4.71897	2.37038e-06	0.000130805
SDC1	ENST00000254351.4	91.9976	-0.887657	0.208371	-4.25998	2.04446e-05	0.000817811
HDGF	ENST00000357325.5	569.082	-0.880877	0.118665	-7.42324	1.14287e-13	3.33997e-11
CHD3	ENST00000380358.4	90.6962	-0.874382	0.23142	-3.77834	0.00015788	0.00446365
FBXW4	ENST00000331272.7	142.986	-0.841365	0.191611	-4.39099	1.12833e-05	0.000501792
TP53TG1	ENST00000359941.5	105.92	-0.839127	0.19989	-4.19794	2.69354e-05	0.00103548
FLVCR1-AS1	ENST00000356684.3	93.7861	-0.820768	0.208102	-3.94408	8.0108e-05	0.00258366
NT5M	ENST00000389022.4	129.85	-0.81636	0.195985	-4.16542	3.10775e-05	0.00116196
RUNX3	ENST00000308873.6	282.446	-0.807168	0.127245	-6.3434	2.24755e-10	3.44224e-08
CTD-2336O2.1	ENST00000518481.1	197.503	-0.783193	0.150021	-5.22056	1.78382e-07	1.41129e-05
GNG7	ENST00000382159.3	199.017	-0.77952	0.154261	-5.05324	4.34368e-07	3.06411e-05
SIRPA	ENST00000356025.3	70.6807	-0.765699	0.259401	-2.9518	0.00315926	0.0486197
IGFBP2	ENST00000233809.4	357.799	-0.759287	0.110603	-6.865	6.64891e-12	1.41055e-09
SLIT3	ENST00000519560.1	213.431	-0.755093	0.141937	-5.3199	1.03822e-07	9.01045e-06
STXBP6	ENST00000323944.5	97.4769	-0.739945	0.216857	-3.41213	0.000644585	0.0137154
FAM171A1	ENST00000378116.4	148.828	-0.73237	0.168296	-4.35167	1.35102e-05	0.000581851
EVI5L	ENST00000270530.4	116.686	-0.720261	0.225454	-3.19471	0.0013997	0.0255497
FAM89A	ENST00000366654.4	769.11	-0.719553	0.0811148	-8.8708	7.26222e-19	5.47342e-16
SORCS1	ENST00000263054.6	128.117	-0.718584	0.17901	-4.01422	5.9643e-05	0.00203354
HPCAL1	ENST00000307845.3	270.85	-0.716156	0.129433	-5.53302	3.14763e-08	3.24274e-06
MAGED2	ENST00000347546.4	98.7323	-0.707951	0.206648	-3.42587	0.000612826	0.0132363
RP11-308N19.1	ENST00000435485.1	93.9691	-0.700061	0.215443	-3.2494	0.00115649	0.021762
CHL1	ENST00000256509.2	179.878	-0.691346	0.153876	-4.49288	7.02667e-06	0.000334292
LINC00476	ENST00000429781.1	159.259	-0.686936	0.16391	-4.19094	2.77801e-05	0.00105814
NBL1	ENST00000375136.3	129.488	-0.681739	0.204153	-3.33936	0.000839726	0.0170083
P2RX7	ENST00000328963.5	249.241	-0.680908	0.127123	-5.35631	8.49391e-08	7.55483e-06
LINC00116	ENST00000414416.2	784.576	-0.677447	0.083873	-8.07705	6.63502e-16	3.16712e-13
TXNDC5	ENST00000379757.4	405.968	-0.675268	0.118206	-5.71263	1.11246e-08	1.26698e-06
PITPNC1	ENST00000580974.1	103.012	-0.668681	0.201521	-3.31817	0.000906089	0.0180462
LRRFIP1	ENST00000289175.6	153.989	-0.667675	0.17842	-3.74215	0.000182453	0.00499089
RBFOX2	ENST00000438146.2	141.845	-0.66395	0.180649	-3.67536	0.000237512	0.00617272
TMEM251	ENST00000415050.2	237.745	-0.660978	0.134263	-4.92302	8.52189e-07	5.34063e-05
RMI2	ENST00000312499.5	229.494	-0.648414	0.133946	-4.84087	1.29272e-06	7.72935e-05
TMEM158	ENST00000503771.1	693.131	-0.646354	0.086815	-7.44519	9.68033e-14	2.85819e-11
MR1	ENST00000367580.5	147.576	-0.64615	0.193882	-3.33269	0.000860101	0.0173108
RP11-383H13.1	ENST00000457356.4	107.682	-0.63145	0.214506	-2.94374	0.00324272	0.0495166
SEMA5A	ENST00000382496.5	624.521	-0.625204	0.0867339	-7.2083	5.66552e-13	1.37509e-10
FEZF1-AS1	ENST00000428449.1	118.748	-0.619024	0.182826	-3.38587	0.000709523	0.0148652
PPP1R14B	ENST00000309318.3	1020.94	-0.6104	0.0806988	-7.56393	3.91069e-14	1.25845e-11
FAM171A2	ENST00000293443.7	195.291	-0.60552	0.149676	-4.04554	5.22036e-05	0.00180787
FKBP14	ENST00000222803.5	1160.44	-0.599122	0.066934	-8.95094	3.52472e-19	2.80411e-16
RP11-557H15.4	ENST00000418837.1	430.467	-0.596491	0.124641	-4.78567	1.70422e-06	9.86036e-05
NRBP2	ENST00000442628.2	148.762	-0.591785	0.167697	-3.5289	0.000417289	0.00968786
C3orf67	ENST00000472469.1	148.805	-0.588287	0.17822	-3.3009	0.000963745	0.0189833
MGAT4B	ENST00000292591.7	585.771	-0.586723	0.0908969	-6.45482	1.08344e-10	1.80406e-08
CTNNBIP1	ENST00000377263.1	831.015	-0.585052	0.0878316	-6.66107	2.71848e-11	5.08872e-09
FAM167B	ENST00000373582.3	2253.64	-0.581482	0.0594074	-9.78804	1.26723e-22	1.6497e-19
UST	ENST00000367463.4	258.548	-0.57677	0.141059	-4.08887	4.33487e-05	0.00154995
ACOT7	ENST00000377855.2	544.527	-0.575703	0.113489	-5.07275	3.92112e-07	2.79355e-05
NRTN	ENST00000303212.2	233.694	-0.575663	0.138411	-4.15909	3.19516e-05	0.00118998
YPEL2	ENST00000312655.4	270.202	-0.57437	0.125213	-4.58715	4.49335e-06	0.000225771
CD82	ENST00000227155.4	540.24	-0.568135	0.104674	-5.42766	5.70964e-08	5.46904e-06
ADCY2	ENST00000338316.4	206.528	-0.567562	0.142917	-3.97128	7.1489e-05	0.00233726
AES	ENST00000327141.4	139.248	-0.556496	0.179806	-3.09499	0.00196821	0.0337542
YBX2	ENST00000007699.5	387.674	-0.555276	0.108136	-5.135	2.8215e-07	2.08805e-05
PCOLCE2	ENST00000295992.3	196.808	-0.552101	0.151225	-3.65087	0.000261357	0.00666542
MAP4K4	ENST00000425019.1	253.683	-0.546381	0.139038	-3.92973	8.50419e-05	0.00271527
AC144652.1	ENST00000609974.1	127.626	-0.540295	0.183555	-2.9435	0.0032452	0.0495166
DUT	ENST00000331200.3	315.405	-0.540029	0.123225	-4.38245	1.17354e-05	0.000520284
AC104655.3	ENST00000436841.1	834.372	-0.539348	0.0827665	-6.51651	7.19642e-11	1.25674e-08
PQLC3	ENST00000295083.3	184.296	-0.538963	0.157367	-3.42487	0.000615099	0.0132754
BCL2A1	ENST00000267953.3	208.61	-0.536983	0.167841	-3.19935	0.00137739	0.0251906
GLRX5	ENST00000331334.4	506.844	-0.532026	0.102202	-5.20561	1.9336e-07	1.50639e-05
GPR155	ENST00000392552.2	188.143	-0.531681	0.150091	-3.54239	0.00039652	0.00926291
SCML4	ENST00000369022.2	345.194	-0.530878	0.115481	-4.59711	4.28384e-06	0.000216765
SGK1	ENST00000528577.1	407.124	-0.517135	0.128307	-4.03045	5.56711e-05	0.00191329
CTSH	ENST00000220166.5	1432.27	-0.516634	0.0658567	-7.84482	4.33563e-15	1.85332e-12
TPST1	ENST00000304842.5	626.873	-0.514831	0.0969368	-5.311	1.09028e-07	9.29081e-06
FBXO2	ENST00000354287.4	525.795	-0.509838	0.0933859	-5.45947	4.77557e-08	4.7326e-06
NARS2	ENST00000281038.5	846.049	-0.508001	0.0933718	-5.44062	5.30946e-08	5.10618e-06
PPP1R14C	ENST00000361131.4	699.183	-0.506248	0.0922407	-5.48833	4.0575e-08	4.07743e-06
DOCK1	ENST00000280333.6	426.248	-0.499352	0.106019	-4.71002	2.47698e-06	0.000135125
FSTL1	ENST00000295633.3	4721.75	-0.498987	0.060083	-8.30496	9.98547e-17	5.49969e-14
PRKCB	ENST00000303531.7	585.022	-0.49657	0.0892797	-5.56195	2.66769e-08	2.76821e-06
GALNT12	ENST00000375011.3	206.672	-0.49583	0.140787	-3.52184	0.00042857	0.00987468
MAGEH1	ENST00000342972.1	577.291	-0.493479	0.101977	-4.83913	1.30406e-06	7.78089e-05
H1FX	ENST00000333762.4	3650.75	-0.491302	0.0570369	-8.61376	7.07054e-18	4.50001e-15
FXYD3	ENST00000603181.1	193.116	-0.486549	0.155312	-3.13273	0.00173188	0.0303185
NANOS1	ENST00000425699.1	727.549	-0.48308	0.0788061	-6.12997	8.78929e-10	1.20443e-07
BTG2	ENST00000290551.4	252.824	-0.483033	0.131234	-3.68071	0.000232587	0.00606124
HIBADH	ENST00000265395.2	973.963	-0.48067	0.0900473	-5.33797	9.39929e-08	8.20718e-06
H2AFJ	ENST00000544848.1	1752.28	-0.475191	0.0622452	-7.63419	2.27252e-14	7.93719e-12
CRIM1	ENST00000280527.2	395.694	-0.472823	0.113313	-4.1727	3.01016e-05	0.00113286
TYR	ENST00000263321.5	912.377	-0.472051	0.0753071	-6.26835	3.64903e-10	5.38701e-08
CBX7	ENST00000216133.5	633.969	-0.466063	0.0992186	-4.69734	2.63572e-06	0.000142428
TRPM1	ENST00000559179.1	1542.89	-0.46373	0.0705424	-6.57378	4.90544e-11	8.78074e-09
PCSK1N	ENST00000218230.5	350.025	-0.462238	0.113211	-4.08298	4.44624e-05	0.00157599
SFRP1	ENST00000220772.3	1641.12	-0.458403	0.0690062	-6.64293	3.07511e-11	5.71891e-09
QSOX1	ENST00000367602.3	1356.2	-0.452932	0.062444	-7.25342	4.0639e-13	1.04856e-10
LYST	ENST00000536965.1	645.644	-0.449359	0.0873013	-5.14722	2.64372e-07	1.97177e-05
RP11-792A8.4	ENST00000607978.1	301.512	-0.447117	0.137427	-3.25349	0.00113995	0.0215642
LOXL3	ENST00000409549.1	696.965	-0.444796	0.0846735	-5.25308	1.49579e-07	1.2205e-05
TAF10	ENST00000299424.4	289.018	-0.439058	0.122095	-3.59604	0.000323097	0.00785525
APOE	ENST00000252486.4	3937.88	-0.438609	0.043604	-10.0589	8.39285e-24	1.41395e-20
KLF15	ENST00000296233.3	332.7	-0.434122	0.113992	-3.80836	0.000139889	0.00407158
CST3	ENST00000376925.3	482.789	-0.43316	0.106796	-4.05597	4.99274e-05	0.00173956
SPARC	ENST00000231061.4	30291.8	-0.432463	0.0411242	-10.516	7.28875e-26	1.60577e-22
TMCC2	ENST00000358024.3	570.379	-0.43223	0.0916314	-4.71705	2.39284e-06	0.000131285
LRP1	ENST00000243077.3	488.113	-0.428983	0.109085	-3.93256	8.40475e-05	0.00268952
SCARB1	ENST00000339570.5	382.953	-0.424405	0.115803	-3.66488	0.000247455	0.0063781
NIPSNAP1	ENST00000216121.7	926.814	-0.419827	0.0888075	-4.72739	2.27429e-06	0.000125988
MAGI1	ENST00000483466.1	269.297	-0.414347	0.127115	-3.25962	0.00111563	0.02119
MAMDC2	ENST00000377182.4	456.883	-0.408872	0.104166	-3.9252	8.6656e-05	0.00276373
ERGIC1	ENST00000393784.3	4831.16	-0.407566	0.0469633	-8.6784	4.0137e-18	2.80372e-15
FBXL7	ENST00000504595.1	591.1	-0.406442	0.0922961	-4.40368	1.0643e-05	0.000476275
ZCCHC24	ENST00000372336.3	2022.59	-0.404569	0.055938	-7.23245	4.74367e-13	1.19174e-10
RP11-1055B8.7	ENST00000307745.7	3065.59	-0.399888	0.0524128	-7.62959	2.35509e-14	8.12648e-12
ISM1	ENST00000262487.4	440.002	-0.39578	0.101517	-3.89865	9.67291e-05	0.00302437
AC095067.1	ENST00000429010.1	379.141	-0.385968	0.104325	-3.69966	0.000215886	0.0057144
BCHE	ENST00000264381.3	644.546	-0.384116	0.0828702	-4.63515	3.56681e-06	0.00018406
PNKD	ENST00000248451.3	861.971	-0.383617	0.0731278	-5.24584	1.55574e-07	1.26222e-05
ACTR1B	ENST00000289228.5	1369.45	-0.381171	0.0640813	-5.94825	2.71031e-09	3.49654e-07
TRIB2	ENST00000155926.4	2390.46	-0.380373	0.0488763	-7.78235	7.11872e-15	2.83167e-12
ZNF595	ENST00000509152.2	414.587	-0.379806	0.10422	-3.64427	0.000268157	0.00676057
H6PD	ENST00000377403.2	986.06	-0.37491	0.0922374	-4.06462	4.81102e-05	0.00168239
DDIT4	ENST00000307365.3	1406.41	-0.371986	0.077063	-4.82704	1.38576e-06	8.20003e-05
SNTA1	ENST00000217381.2	440.217	-0.370839	0.101799	-3.64286	0.00026963	0.00678577
XYLT1	ENST00000261381.6	2121.21	-0.36688	0.0699076	-5.24807	1.53699e-07	1.25055e-05
CMBL	ENST00000296658.3	544.594	-0.365113	0.0948478	-3.84946	0.000118377	0.00359906
BTN3A2	ENST00000356386.2	936.824	-0.363905	0.0785054	-4.63541	3.56225e-06	0.00018406
QPRT	ENST00000395384.4	3637.5	-0.360459	0.0462697	-7.7904	6.67992e-15	2.73304e-12
CIAO1	ENST00000488633.1	2638.36	-0.358351	0.0477447	-7.50557	6.11621e-14	1.86349e-11
STK32A	ENST00000397936.3	631.242	-0.353638	0.0855332	-4.1345	3.55722e-05	0.00130114
ACTN4	ENST00000252699.2	7184.08	-0.352458	0.0389367	-9.05208	1.40273e-19	1.18159e-16
NLGN2	ENST00000302926.2	387.675	-0.351227	0.106496	-3.29804	0.000973615	0.0191645
SQLE	ENST00000265896.5	1059.03	-0.345969	0.0734728	-4.7088	2.4918e-06	0.000135675
SESN3	ENST00000536441.1	1106.19	-0.344832	0.0696802	-4.94878	7.46801e-07	4.76007e-05
FAM114A1	ENST00000358869.2	609.504	-0.344668	0.0947347	-3.63825	0.000274502	0.00684814
PMP2	ENST00000256103.2	650.588	-0.342059	0.090352	-3.78585	0.000153184	0.00435669
CLCN5	ENST00000376088.3	1031.77	-0.334479	0.0782836	-4.27265	1.93159e-05	0.000782473
SEMA4C	ENST00000305476.5	6062.13	-0.330578	0.0514791	-6.4216	1.34853e-10	2.19442e-08
IVNS1ABP	ENST00000367498.3	1016.24	-0.327831	0.0737881	-4.44287	8.87676e-06	0.000406119
ADAM23	ENST00000264377.3	572.854	-0.327074	0.0905148	-3.61349	0.000302104	0.00741411
MAP3K13	ENST00000448876.1	416.345	-0.326509	0.0991001	-3.29474	0.000985121	0.0192848
TP73-AS1	ENST00000452079.1	547.285	-0.316265	0.0940465	-3.36286	0.0007714	0.0159285
LAMC1	ENST00000258341.4	5177.53	-0.310769	0.0452876	-6.86212	6.78468e-12	1.42877e-09
NPTX2	ENST00000265634.3	800.32	-0.307991	0.0863221	-3.56793	0.000359816	0.00857333
GDF11	ENST00000257868.5	967.969	-0.305715	0.0711546	-4.29649	1.7352e-05	0.000718154
AFAP1L1	ENST00000296721.4	731.359	-0.302476	0.0833931	-3.62711	0.000286613	0.00709533
MBOAT2	ENST00000305997.3	821.374	-0.301979	0.0810228	-3.72709	0.000193706	0.00525852
MSI2	ENST00000284073.2	3642.56	-0.300184	0.0462636	-6.48854	8.667e-11	1.47752e-08
EXOC6B	ENST00000272427.6	477.798	-0.298141	0.0969419	-3.07546	0.00210178	0.0355342
SEMA4F	ENST00000357877.2	802.048	-0.294243	0.0757313	-3.88536	0.00010218	0.00317402
CREG1	ENST00000370509.4	1312.54	-0.294172	0.0651482	-4.51543	6.31884e-06	0.000307252
IDI1	ENST00000381344.3	658.804	-0.289641	0.0844148	-3.43116	0.000600995	0.0130398
GPM6B	ENST00000454189.2	705.131	-0.278082	0.0862704	-3.22338	0.00126687	0.0234691
RAB38	ENST00000243662.6	2268.55	-0.276843	0.0526047	-5.2627	1.41954e-07	1.16827e-05
CSPG4	ENST00000308508.5	19405.6	-0.27164	0.0475538	-5.71227	1.1148e-08	1.26698e-06
LONRF1	ENST00000398246.3	1231.73	-0.271381	0.0678836	-3.99774	6.39507e-05	0.00214597
PPP2R5A	ENST00000261461.2	1103.37	-0.267851	0.0658419	-4.0681	4.73989e-05	0.00166565
EXT1	ENST00000378204.2	1131.17	-0.252713	0.0726701	-3.47754	0.000506031	0.0112784
DCT	ENST00000377028.5	14695.3	-0.249627	0.0383383	-6.51116	7.45718e-11	1.29439e-08
ANKRD27	ENST00000306065.4	1307.51	-0.249513	0.0639233	-3.90332	9.48814e-05	0.00297961
SREBF2	ENST00000361204.4	1572.69	-0.245049	0.0767722	-3.1919	0.00141338	0.0257502
UBE2H	ENST00000355621.3	2499.71	-0.243389	0.0625326	-3.89219	9.93448e-05	0.00309939
SDC3	ENST00000336798.7	23225.2	-0.242415	0.0410419	-5.90653	3.49378e-09	4.31302e-07
RP4-718J7.4	ENST00000424850.1	1170.25	-0.232954	0.075139	-3.1003	0.00193322	0.0332537
SCD	ENST00000370355.2	34581.9	-0.219072	0.0466881	-4.69224	2.70223e-06	0.00014499
STK10	ENST00000176763.5	5333.88	-0.218615	0.0411308	-5.31512	1.06588e-07	9.13973e-06
LINC00698	ENST00000468072.1	2891.5	-0.215051	0.0493991	-4.35334	1.34081e-05	0.0005792
FADS1	ENST00000350997.7	2073.03	-0.212391	0.0564859	-3.76007	0.000169867	0.00472328
PCDHGC3	ENST00000308177.3	2457.75	-0.206546	0.0522402	-3.95377	7.69294e-05	0.00250086
NFIC	ENST00000589123.1	1687.47	-0.1837	0.0573235	-3.20461	0.00135246	0.0247821
CAPN15	ENST00000219611.2	1853.71	-0.176695	0.0581936	-3.03633	0.00239475	0.0392904
GM2A	ENST00000357164.3	4273.79	-0.168115	0.0564023	-2.98064	0.00287645	0.0454895
SCAF1	ENST00000360565.3	3349.35	-0.136341	0.0463377	-2.94234	0.00325739	0.0495969
MARCKS	ENST00000368635.4	3672.75	-0.130961	0.0435389	-3.00791	0.00263047	0.0423628
MT-ND4	ENST00000361381.2	313911	0.119944	0.0359282	3.33844	0.000842487	0.017049
OTUD7B	ENST00000369135.4	2289.17	0.165122	0.0547372	3.01663	0.00255598	0.0413961
ZNF703	ENST00000331569.4	5632.32	0.197034	0.0480633	4.09947	4.14091e-05	0.00149742
TMEM201	ENST00000340305.5	2714.61	0.203761	0.0564514	3.60949	0.000306797	0.00750356
NUP50	ENST00000347635.4	3211.73	0.222985	0.0643574	3.46478	0.000530657	0.0117269
RP11-459E5.1	ENST00000521141.1	1051.59	0.243134	0.0706564	3.44107	0.000579412	0.0126001
ZC3H4	ENST00000253048.5	1945.29	0.255801	0.0575218	4.44702	8.70683e-06	0.000400263
RBM28	ENST00000223073.2	565.275	0.264748	0.0893667	2.96249	0.00305157	0.0474744
FOXK1	ENST00000328914.4	2481.52	0.273224	0.0505987	5.39981	6.67099e-08	6.26417e-06
NCKAP5L	ENST00000335999.6	1876.19	0.276355	0.0634118	4.35811	1.31193e-05	0.000571018
MT-CYB	ENST00000361789.2	111538	0.282672	0.0457869	6.17364	6.67374e-10	9.41556e-08
IRF4	ENST00000380956.4	2003.23	0.289463	0.0683227	4.2367	2.26827e-05	0.000896045
SF3B4	ENST00000271628.8	854.222	0.320653	0.078824	4.06797	4.74248e-05	0.00166565
C11orf95	ENST00000433688.1	590.356	0.322004	0.0968852	3.32356	0.000888765	0.0177877
TGFB1	ENST00000221930.5	417.451	0.326482	0.102686	3.17943	0.00147567	0.0267151
NABP1	ENST00000410026.2	794.267	0.328603	0.0813878	4.0375	5.40238e-05	0.00186415
BRD4	ENST00000263377.2	903.577	0.329659	0.0782984	4.21029	2.55045e-05	0.000989767
MT-RNR2	ENST00000387347.2	330353	0.356192	0.0493832	7.21282	5.48063e-13	1.34158e-10
RP4-758J18.13	ENST00000607307.1	270.981	0.393099	0.128594	3.05689	0.00223643	0.0371959
POLR2A	ENST00000322644.6	3827.34	0.443875	0.0465322	9.5391	1.44076e-21	1.58705e-18
RP1-212P9.2	ENST00000443593.2	458.91	0.444906	0.0994564	4.47337	7.69948e-06	0.000360316
ZNF121	ENST00000590933.1	306.618	0.455657	0.116205	3.92115	8.81274e-05	0.00280441
MT-ND1	ENST00000361390.2	71967.3	0.459318	0.106025	4.33216	1.47651e-05	0.000626479
ATP6V1C1	ENST00000395862.3	1938.56	0.470118	0.0690029	6.81302	9.55689e-12	1.9834e-09
AP5Z1	ENST00000348624.4	203.454	0.490802	0.146512	3.3499	0.000808394	0.0165401
PPHLN1	ENST00000432191.2	203.95	0.491988	0.143747	3.4226	0.000620259	0.0133365
ATF5	ENST00000423777.2	359.039	0.493331	0.124656	3.95754	7.57268e-05	0.00246702
HIPK2	ENST00000406875.3	1213.3	0.527765	0.0689794	7.65105	1.99338e-14	7.22225e-12
KCNQ1OT1	ENST00000597346.1	223.99	0.540492	0.139763	3.86721	0.00011009	0.0033976
MAF	ENST00000393350.1	311.406	0.544357	0.119227	4.56571	4.97815e-06	0.000246668
JUN	ENST00000371222.2	302.038	0.554599	0.120751	4.59293	4.37059e-06	0.000220166
PSMD12	ENST00000356126.3	191.995	0.555634	0.152661	3.63966	0.000273001	0.00682861
BAIAP2L2	ENST00000381669.3	826.39	0.583385	0.0884055	6.59896	4.14045e-11	7.60145e-09
SNAI1	ENST00000244050.2	294.895	0.59484	0.130084	4.57274	4.81387e-06	0.000240609
RPL37	ENST00000274242.5	1021.89	0.625141	0.0716629	8.72336	2.70056e-18	1.98318e-15
RP11-1220K2.2	ENST00000477922.3	100.319	0.628182	0.200321	3.13588	0.00171341	0.0300216
SGPP2	ENST00000321276.7	119.125	0.6326	0.206142	3.06876	0.00214952	0.0360857
NOTCH1	ENST00000277541.6	254.868	0.644485	0.127648	5.04894	4.44261e-07	3.1262e-05
SLC30A1	ENST00000367001.4	2723.79	0.660798	0.118662	5.56873	2.56597e-08	2.67234e-06
RP11-175O19.4	ENST00000421806.1	150.599	0.744753	0.171511	4.34231	1.40991e-05	0.000602682
C12orf49	ENST00000261318.3	1660.01	0.768895	0.0570093	13.4872	1.86072e-41	8.88184e-38
SLC25A16	ENST00000609923.1	366.02	0.80555	0.113906	7.07205	1.52666e-12	3.55475e-10
CELF2-AS1	ENST00000379256.3	58.1023	0.882415	0.278645	3.1668	0.00154124	0.0277094
CCDC144A	ENST00000399273.1	145.116	0.966797	0.17751	5.44644	5.1388e-08	4.98899e-06
APOLD1	ENST00000356591.4	197.587	1.01597	0.165299	6.14626	7.93298e-10	1.10219e-07
LINC00176	ENST00000444463.1	197.328	1.02962	0.152426	6.75487	1.42963e-11	2.82377e-09
RNF144B	ENST00000259939.3	326.421	1.03438	0.122603	8.43685	3.26013e-17	1.83079e-14
HRNR	ENST00000368801.2	65.588	1.07116	0.25607	4.18308	2.87583e-05	0.00109381
TNFAIP3	ENST00000237289.4	306.297	1.11753	0.120656	9.26211	2.00426e-20	1.85167e-17
EIF1	ENST00000469257.1	96.1506	1.19321	0.227918	5.23525	1.64763e-07	1.31443e-05
MAP4	ENST00000426837.2	125.373	1.31981	0.212467	6.21186	5.23611e-10	7.53578e-08
RP11-54O7.17	ENST00000606034.1	40.9505	1.81881	0.355026	5.12304	3.00652e-07	2.1966e-05
LYPD1	ENST00000397463.2	81.4137	1.89068	0.246043	7.68434	1.53788e-14	5.7201e-12
