# Supplementary material for: The MITF-SOX10 regulated long non-coding RNA DIRC3 is a melanoma tumour suppressor
Source: PLoS Genet. 2019 Dec 27;15(12):e1008501. doi: 10.1371/journal.pgen.1008501 (PMC6934268; doi:10.1371/journal.pgen.1008501)
Supplement: S7 Table — (XLSX) [file pgen.1008501.s011.xlsx]

## Sheet: S7 Table Oligonucleotides
S7 Table: Oligonucleotides
Cloning
CRISPRi
DIRC3sg1F	CACCGTTCGGGAAGCTTTTACTCA
DIRC3sg1R	AAACTGAGTAAAAGCTTCCCGAAC
DIRC3sg2F	CACCGTTGGTCCTGCAGGCTGTAC
DIRC3sg2R	AAACGTACAGCCTGCAGGACCAAC
NEGsg1F	CACCGCGCCAAACGTGCCCTGACGG
NEGsg1R	AAACCCGTCAGGGCACGTTTGGCGC
dCas9KRAB FOR	TTTggccggccGGCGGGTCCGACCTCCCTAGCAAACTGGGGCA
dCas9KRAB REV	TTTggccggccAGGGCTCTTCTCCCTTCTCCAACCG)
Modified guide backbone gBlock	ttGGTCTCtcaccggGTCTTCgaGAAGACctgtttaagagctatgctggaaacagcatagcaagtttaaataaggctagtccgttatcaacttgaaaaagtggcaccgagtcggtgcttttttGGATCCtt
pCAGGS-DIRC3
DIRC3flFOR	AGACAGATCTAATACTGAGACTGGATAAT
DIRC3flREV	AGACAGATCTTGTCTTCAGATTCCAAAAG
siRNA
siMitf1	AGCAGUACCUUUCUACCAC
siMitf1as	GUGGUAGAAAGGUACUGCU
siMitf2	CUCCUGUCCAGCCAACCUU
siMitf2as	AAGGUUGGCUGGACAGGAG
siCtrl	UUCUCCGAACGUGUCACGU
siCtrlas	ACGUGACACGUUCGGAGAA
siSOX10-1	Dharmacon D-0171902-01-0005 Target sequence: GAACGAAAGUGACAAGCGC
siSOX10-2	Dharmacon D-0171902-03-0005 Target sequence: GCGGGAAGCCUCACAUCGA
siControl	Dharmacon D-001206-13-05 siGenome Non-targeting siRNA Pool #1
ASO LNA GapmeRs
NEG ASO	AACACGTCTATACGC
DIRC3_ASO1	ACAAATAAGTAGACGT
DIRC3_ASO2	AACGGAAGGGACGTGT
IGFBP5_ASO1	GGAATGGTGCGAGTAT
RT-qPCR
DIRC3 Fwd	CCCACCCCACCACTATTCAC
DIRC3 Rev	CCACTGGGACAACCATCTCC
IGFBP5 Fwd	ACAAGAGAAAGCAGTGCAAACC
IGFBP5 Rev	CGTCAACGTACTCCATGCCT
MITF Fwd	TGGCAAATACGTTGCCTG
MITF Rev	ACGCTGTGAGCTCCCTTT
PolII Fwd	TTGTGCAGGACACACTCACA
PolII Rev	CAGGAGGTTCATCACTTCACC
SOX10Fwd	ACAAGAAAGACCACCCGGAC
SOX10Rev	AAGTGGGCGCTCTTGTAGTG
TNS1Fwd	GCGTTCCTCCATCCAACCAT
TNS1Rev	GCTCCTTCTCCCTTGTCCAC
ChIP primers
Control F	TCAGATGCATTGTCACGCCT
Control R	AGACCCAGTGAGAGAGACCC
Peak 1 F	CCTCTCCCAGGCCATTACAA
Peak 1 R	TAATTCCCCTCAGCTTCCAGC
Peak 2 F	CCCCTCACAGAAGAAAAGCCT
Peak 2 R	GGAGTCTGCATGAAAGGGGC
Peak 3 F	GACAGACAACAGTCATGTGGTT
Peak 3 R	GCTCCTTCCTCTTTTTCCCAGA
Peak 4 F	GAGAGTCCGTGAAGGAGTGG
Peak 4 R	CCTCCGCCAGCAATAGATAA
