# Supplementary material for: The MITF-SOX10 regulated long non-coding RNA DIRC3 is a melanoma tumour suppressor
Source: PLoS Genet. 2019 Dec 27;15(12):e1008501. doi: 10.1371/journal.pgen.1008501 (PMC6934268; doi:10.1371/journal.pgen.1008501)
Supplement: S8 Table — (XLSX) [file pgen.1008501.s012.xlsx]

## Sheet: Fig 2
Expression normalised to PolII reference gene and presented relative to siControl for all KD experiments
Fig 2B siMITF
SK-MEL-28												A375
	SiCtrl	SiCtrl	SiCtrl	SiMitf1	SiMitf1	SiMitf1	Ave	sem	ttest				siCtrl	siMITF-1	siMITF-2			siCtrl	siMITF-1	siMITF-2
Mitf	1	1	1	0.878469	0.899615	0.898596	0.892227	0.00688512	0.00202825			DIRC3	1	0.868992			MITF	1	0.455441	0.424201
Dirc3	1	1	1	2.3422	1.73236	1.45782	1.84413	0.261343	0.0419786				1	2.46116	1.05483			1	0.452191	0.411302
													1	0.724397	0.53033			1	0.424706	0.325205
	SiCtrl			SiMitf2	SiMitf2	SiMitf2	Ave	sem	ttest				1	0.466392	0.196186			1	0.339783	0.274317
Mitf	1	1	1	0.749396	0.671564	0.730925	0.717295	0.0234788	0.00341343				1	0.723244	0.396611			1	0.345907	0.297132
Dirc3	1	1	1	1.3329	1.31103	1.50441	1.38278	0.0611437	0.0122893				1	1.26154	0.609154			1	0.391852	0.350965
												Average	1	1.08429	0.557423		Average	1	0.401647	0.347187
												sem	0	0.295252	0.142685		sem	0	0.0208249	0.0247352
501mel												ttest		0.393364	0.0180795		ttest		4.78393e-07	7.2988e-07
	siCtrl	siMitf1	siMitf2			siCtrl	siMitf1	siMitf2
Dirc3	1	2.29838	3.40426		MITF	1	0.538657	0.356922
	1	2.67193	2.87896			1	0.868472	0.548697
	1	2.50135	2.04636			1	0.653908	0.490525
Ave	1	2.49055	2.77653		Ave	1	0.687012	0.465381
sem	0	0.107969	0.395322		sem	0	0.0966374	0.0567702
Ttest		0.00260298	0.0230594		ttest		0.0417783	0.00554436
Fig 2C siSOX10
SK-MEL-28						501mel					A375
SOX10	siCtrl	siSOX10-1	siSOX10-2			siCtrl	siSOX10-1				siCtrl	siSOX10-1	siSOX10-2
	1	0.386656	0.700928			1	0.713426	siSOX10-2			1	3.39687	2.78166	DIRC3
	1	0.770642	0.755541			1	2.05834	1.10574	DIRC3		1	2.38093	3.45434
	1	0.889156	0.620794			1	1.97559	3.04239			1	2.95208	2.68264
	1	0.804863	0.730302			1	2.5612	1.60101			1	2.90996	2.97288	Average
	1	0.822351	0.825409			1	0.394731	2.22473			0	0.294031	0.242421	sem
	1	0.907823	0.753356			1	1.05319	1.13916				0.0114444	0.00738256	ttest
Ave	1	0.763582	0.731055			1	2.47968	1.63364
sem	0	0.0782848	0.0277279			1	1.20246	4.87512			1	1.23865	2.27224	MITF
ttest		0.0147086	9.89267e-05			1	0.809445	1.03737			1	1.00899	2.6129
						1	1.47201	0.487537			1	1.2461	2.49155
DIRC3	siCtrl	siSOX10-1	siSOX10-2			0	0.253911	1.90519	Average		1	1.16458	2.4589	Average
	1	1.55012	1.1494				0.0535373	0.42121	sem			0.0778269	0.0996855	sem
	1	1.52309	2.216					0.0386608	ttest			0.0843763	0.00231823	ttest
	1	1.59772	1.90723			1	0.278474
	1	2.20416	3.10524			1	0.285773	0.301962	MITF		1	0.296505	0.223536	SOX10
	1	1.47035	3.22645			1	0.302709	0.335533			1	0.33429	0.184041
	1	1.01481	1.57284			1	0.156676	0.331052			1	0.308524	0.158082
Ave	1	1.56004	2.19619			1	0.216653	0.29113			1	0.313106	0.188553	Average
sem	0	0.155252	0.339413			1	0.24757	0.339036			0	0.0111456	0.0190291	sem
ttest		0.00771198	0.00842085			1	0.205151	0.340949				0.000131591	0.000274743	ttest
						1	0.191954	0.187895
MITF	siCtrl	siSOX10-1	siSOX10-2			1	0.219697	0.167262
	1	0.863323	0.923605			1	0.233851	0.217623
	1	0.886866	0.868029			0	0.0160935	0.27916	Average
	1	0.756239	0.799542				2.09588e-11	0.0231463	sem
	1	0.736797	0.607334					6.14456e-10	ttest
	1	0.720676	0.617003			1	0.158033
	1	0.713942	0.492063			1	0.179122	0.191138	SOX10
Ave	1	0.77964	0.717929			1	0.18683	0.21657
sem	0	0.0309172	0.0695044			1	0.0958737	0.201773
ttest		0.000421813	0.00487263			1	0.109965	0.153773
						1	0.130804	0.138165
						1	0.138899	0.131558
						1	0.122845	0.126513
						1	0.130577	0.123337
						1	0.139217	0.139273
						0	0.0101115	0.158011	Average
							2.02221e-13	0.0118432	sem
								8.53145e-13	ttest

## Sheet: Fig 3
Fig 3A
	Nuc 1	Nuc 2	Cyt 1	Cyt 2	Cytoplasm
Dirc3	1	1	0.444157	0.24884	0.346498
Neat1	1	1	0.538483	0.12761	0.333046
Dancr	1	1	13.2292	6.25981	9.74452
Expression in nucleus set to 1
Fig 3D										Fig 3E
							sg1	se			Neg			Ave	DIRC3 sg1			Ave	sem
Neg sg	1	1	1	1	1	1	1			Dirc3	1	1	1	1	0.673134	0.728025	0.709649	0.703603	0.0161314
Dirc3	0.711995	0.654789	0.604466				0.657083	0.0310623		IGFBP5	1	1	1	1	0.450255	0.823324	0.794141	0.68924	0.119789
IGFBP5	0.404668	0.562754	0.622489				0.52997	0.064981		TNS1	1	1	1	1	1.17486	0.998794	0.875043	1.01623	0.0869868
TNS1	0.860624	1.1235	1.45338				1.14583	0.171477
							sg2	se
Dirc3	0.289017	0.394796	0.299219	0.551131	0.506459	0.456649	0.416212	0.0440861
IGFBP5	0.446933	0.597661	0.700387	0.314114	0.345902	0.221017	0.437669	0.0742359
TNS1	1.36259	1.28087	1.03335				1.2256	0.0989795
Ave	Neg sg	DIRC3 sg1	DIRC3 sg2
DIRC3	1	0.657083	0.416212
IGFBP5	1	0.52997	0.437669
TNS1	1	1.14583	1.2256
sem	Neg sg	DIRC3 sg1	DIRC3 sg2
DIRC3	0	0.0310623	0.0440861
IGFBP5	0	0.064981	0.0742359
TNS1	0	0.171477	0.0989795
Fig 3F						DIRC3	sem			Fig 3G
	Neg ASO	1	1	1	1	1	0
	DIRC3 ASO1	0.429282	0.592877	0.501514	0.742234	0.566477	0.0674724			DIRC3	Control	250ng CAGGS-DIRC3
	DIRC3 ASO2	0.744435	0.435167	0.393889		0.524497	0.117755				1	22.0215
											1	16.3843
						IGFBP5	sem				1	25.7816
	Neg ASO										1	7.76033
	DIRC3 ASO1	0.520688	0.826975	0.336958	0.803293	0.621978	0.117755				1	6.28815
	DIRC3 ASO2	0.519688	0.77419	0.700464		0.66478	0.0756038				1	5.21809
										Ave	1	13.909
	Neg LNA	DIRC3 LNA-2	DIRC3 LNA-3	se LNA-2	se LNA-3					sem	0	3.57917
DIRC3	1	0.566477	0.524497	0.0674724	0.110613					ttest		0.00771696
IGFBP5	1	0.621978	0.66478	0.117755	0.0756038
										IGFBP5	Control	250ng CAGGS-DIRC3
											1	1.44004
											1	0.965069
											1	0.998149
											1	0.929761
											1	0.495682
											1	0.816932
										Ave	1	0.940939
										sem	0	0.124728
										ttest		0.327899

## Sheet: Fig 4
Fig 4A
				Ave	sem
	R1	R2	R3	DIRC3
NegASO	1.16545	0.905273	1.11835	1.06303	0.0800394
DIRC3 ASO	0.374293	0.37097	0.356075	0.367113	0.00560156
				IGFBP5
Neg ASO	0.933633	1.01804	0.967699	0.973123	0.0245156
DIRC3 ASO	0.117562	0.319667	0.344335	0.260521	0.0718335
	DIRC3	sem	IGFBP5
NegASO	1.06303	0.0800394	0.973123	0.0245156
DIRC3 ASO	0.367113	0.00560156	0.260521	0.0718335
Fig 4B
	IGFBP5 ASO
	R1	R2	R3	IGFBP5	sem
NEG ASO	0.767788	0.994138	0.996505	0.919477	0.0758476
IGFBP5 ASO	0.185756	0.208882	0.247687	0.214108	0.018068

## Sheet: Fig 5
Fig 5A DIRC3 KD SKmel28
Expression analysis
	Negsg1			Mean	sem
DIRC3	1	1	1	1	0
IGFBP5	1	1	1	1	0
	DIRC3sg1
DIRC3	0.17407	0.274035	0.282763	0.243623	0.0348674
IGFBP5	0.0452507	0.040459	0.0278658	0.0378585	0.00518429
	DIRC3sg2
DIRC3	0.227555	0.225176	0.490507	0.314413	0.0880498
IGFBP5	0.0245585	0.0156059	0.0180088	0.0193911	0.00267523
Growth in soft agar
	R1	R2	R3	Ave no colonies	sem
Negsg1	21.5	15.5	28	21.6667	3.6094
DIRC3sg1	33	35	42	36.6667	2.72845
DIRC3sg2	53	93	69	71.6667	11.6237
Fig 5B IGFBP5 kd SKmel28
IGFBP5 expression
	R1	R2	R3	IGFBP5	sem
Negsg1	1	1	1	1	0
IGFBP5sg1	0.63728	0.316439	0.269807	0.407842	0.115506
IGFBP5sg2	0.00160858	0.00126206	0.000471649	0.0011141	0.000336438
Growth in soft agar
	R1	R2	R3	Ave no colonies	sem
Negsg1	40	31	2	24.3333	11.4649
IGFBP5sg1	144	147	63	118	27.5136
IGFBP5sg2	159	217	123	166.333	27.3821
Fig 5C DIRC3 KD A375
Expression analysis
	Negsg1			Mean	sem
DIRC3	1	1	1	1	0
IGFBP5	1	1	1	1	0
	DIRC3sg1
DIRC3	0.348565	0.319093	0.495578	0.387745	0.0545836
IGFBP5	0.125632	0.116239	0.125873	0.122581	0.00317189
	DIRC3sg2
DIRC3	0.393438	0.262337	0.166248	0.274008	0.0658433
IGFBP5	0.140181	0.136618	0.137136	0.137978	0.00111154
Growth in soft agar
	R1	R2	R3	Ave no colonies	sem
Negsg1	17	10	1	9.33333	4.63081
DIRC3sg1	102	81	45	76	16.6433
DIRC3sg2	67	66	51	61.3333	5.17472
Fig 5D DIRC3 KD 501mel
Expression analysis
	Negsg1			Mean	sem
DIRC3	1	1	1	1	0
IGFBP5	1	1	1	1	0
	DIRC3sg1
DIRC3	0.0834315	0.166208	0.23778	0.162473	0.0445956
IGFBP5				0.312959	0.00405178
	DIRC3sg2
DIRC3	0.0473531	0.0891436	0.0810647	0.0725205	0.012798
IGFBP5	1.89586	1.86104	1.94766	1.90152	0.0251664
Growth in soft agar
	R1	R2	R3	Ave no colonies	sem
Negsg1	107	95	96	99.3333	3.84419
DIRC3sg1	200	199	221	206.667	7.17248
DIRC3sg2	139	147	120	135.333	8.00694

## Sheet: Fig 6
Fig 6A
				DIRC3	sem
sgCont	1	1	1	1	0
sg1 DIRC3	0.577035	0.351613	0.545507	0.491385	0.0704763
sg2 DIRC3	0.468373	0.0104799	0.428266	0.302373	0.146405
Fig 6B	SOX10 ChIP						IgG Control ChIP								SOX10
sgCont	BS1	BS2	BS3	BS4	Control		sgCont	BS1	BS2	BS3	BS4	Control			Mean		sgCont	sg1 DIRC3	sg2 DIRC3
	0.844203	2.04912	1	0.124899	0.151113			0.000467051	0.00691921	0.00153995	0.000206085	0.000472098			BS1	IgG	0.0349834	0.0271848	0.0150025
	1.48497	2.09887	1	0.173587	0.111951			0.000302228	0.0150359	0.019362	0.0197146	0.0271428				SOX10	1.09761	1.87511	1.95007
	1.196	1.16058	1	0.305366	0.236245			0.164224	0.173544	0.153231	0.213852	0.191429			BS2	IgG	0.0433505	0.0296185	0.0179526
	0.788833	2.01553	1	0.186308	0.0784943			0.00442328	0.00541413	0.00164987	0.00437039	0.00400171				SOX10	1.75343	2.37947	3.32449
	1.17403	1.44307	1	0.262729	0.172383			0.00550085	0.015839	0.0135372	0.0111718	0.0105809			BS3	IgG	0.0378641	0.0244202	0.00872605
Mean	1.09761	1.75343	1	0.210578	0.150037		Mean	0.0349834	0.0433505	0.0378641	0.0498629	0.0467253				SOX10	1	1.86195	2.12556
sem	0.127501	0.190164	0	0.0324057	0.026927		sem	0.0323267	0.0326155	0.029047	0.04113	0.0364649			BS4	IgG	0.0498629	0.025052	0.0111197
																SOX10	0.210578	0.576359	0.441163
sg1 DIRC3	BS1	BS2	BS3	BS4	Control		sg1 DIRC3	BS1	BS2	BS3	BS4	Control			Control	IgG	0.0467253	0.0308882	0.0112415
	1.10677	2.11349	1.98747	0.295979	0.135076			0.00749361	0.00183362	0.000824829	0.00195806	0.0103212				SOX10	0.150037	0.509647	0.192418
	1.98562	2.21578	1.67858	0.672545	0.684508			0.0689786	0.0701905	0.0644026	0.0641958	0.0626563
	2.53294	2.80913	1.91981	0.760552	0.709358			0.00508211	0.0168315	0.00803316	0.00900206	0.0196872			sem		sgCont	sg1 DIRC3	sg2 DIRC3
Mean	1.87511	2.37947	1.86195	0.576359	0.509647		Mean	0.0271848	0.0296185	0.0244202	0.025052	0.0308882			BS1	IgG	0.0323267	0.0209085	0.00770522
sem	0.41539	0.21685	0.0937448	0.142473	0.187423		sem	0.0209085	0.0207428	0.0200992	0.0196773	0.0161125				SOX10	0.127501	0.41539	0.31791
															BS2	IgG	0.0326155	0.0207428	0.013773
sg2 DIRC3	BS1	BS2	BS3	BS4	Control		sg2 DIRC3	BS1	BS2	BS3	BS4	Control				SOX10	0.190164	0.21685	0.143981
	1.73334	3.51899	2.06119	0.33811	0.176497			0.00662068	0.00278535	0.00181528	0.00389379	0.00377054			BS3	IgG	0.029047	0.0200992	0.00378013
	1.54078	3.04335	1.79598	0.389913	0.235682			0.0303926	0.0454499	0.0148364	0.0189987	0.0347462				SOX10	0	0.0937448	0.21133
	2.5761	3.41114	2.5195	0.595466	0.165076			0.00799438	0.00562257	0.00952643	0.0104667	0.0112415			BS4	IgG	0.04113	0.0196773	0.00437262
Mean	1.95007	3.32449	2.12556	0.441163	0.192418		Mean	0.0150025	0.0179526	0.00872605	0.0111197	0.0165861				SOX10	0.0324057	0.142473	0.0785873
sem	0.31791	0.143981	0.21133	0.0785873	0.0218818		sem	0.00770522	0.013773	0.00378013	0.00437262	0.00933266			Control	IgG	0.0364649	0.0161125	0.00933266
																SOX10	0.026927	0.187423	0.0218818
Fig 6C	H3K27ac ChIP						IgG Control ChIP								H3K27ac
	sgCont			Mean	sem			sgCont			Mean	sem			Mean		sgCont	sg1 DIRC3	sg2 DIRC3
BS1	1.48882	1.39947	1.71836	1.53555	0.0949761		BS1	5.44581e-05	0.0227276	0.000740754	0.00784095	0.00744598			BS1	IgG	0.00784095	0.00361673	0.00274992
BS2	0.439792	0.309456	0.563476	0.437575	0.0733378		BS2	0.0027093	0.0240176	0.000906687	0.00921119	0.00742146				H3K27ac	1.53555	3.14244	1.88948
BS3	1	1	1	1	0		BS3	0.00348882	0.0212063	0.000276299	0.00832382	0.00650768			BS2	IgG	0.00921119	0.00377478	0.00332137
BS4	0.198813	0.135924	0.105585	0.146774	0.0274539		BS4	0.00355234	0.0295959	0.000731895	0.0112934	0.0091874				H3K27ac	0.437575	0.988537	0.726409
Control	0.0510792	0.0412654	0.0175144	0.0366197	0.00996385		Control	0.00640318	0.025689	0.000775689	0.010956	0.00754352			BS3	IgG	0.00832382	0.00325156	0.00162701
																H3K27ac	1	1.58629	1.18975
	sg1 DIRC3			Mean				sg1 DIRC3							BS4	IgG	0.0112934	0.00400725	0.00202203
BS1	2.41061	3.72945	3.28727	3.14244	0.387542		BS1	0.000969451	0.00954625	0.000334489	0.00361673	0.00297042				H3K27ac	0.146774	0.113074	0.254282
BS2	0.68621	1.10475	1.17465	0.988537	0.152504		BS2	0.00126446	0.00971397	0.000345914	0.00377478	0.00298141			Control	IgG	0.010956	0.00457764	0.00408944
BS3	0.879069	1.93188	1.94793	1.58629	0.353642		BS3	0.000241643	0.00891296	0.000600068	0.00325156	0.00283259				H3K27ac	0.0366197	0.0641242	0.0452524
BS4	0.159307	0.177519	0.00239549	0.113074	0.0555885		BS4	0.00191246	0.00888434	0.00122496	0.00400725	0.00244661
Control	0.0655953	0.0994797	0.0272978	0.0641242	0.0208501		Control	0.00300676	0.00921336	0.0015128	0.00457764	0.00235764			sem
															BS1	IgG	0.00744598	0.00297042	0.00136352
	sg2 DIRC3			Mean				sg2 DIRC3								H3K27ac	0.0949761	0.387542	0.307277
BS1	2.42699	1.36271	1.87875	1.88948	0.307277		BS1	0.0054764	0.00143458	0.00133879	0.00274992	0.00136352			BS2	IgG	0.00742146	0.00298141	0.0024343
BS2	1.06994	0.399201	0.71009	0.726409	0.193796		BS2	0.00818956	0.000832946	0.000941595	0.00332137	0.0024343				H3K27ac	0.0733378	0.152504	0.193796
BS3	1.35506	0.826615	1.38758	1.18975	0.18181		BS3	0.00267336	0.000612316	0.00159536	0.00162701	0.000595182			BS3	IgG	0.00650768	0.00283259	0.000595182
BS4	0.333913	0.144126	0.284809	0.254282	0.0568732		BS4	0.00342335	0.000889935	0.00175282	0.00202203	0.000743618				H3K27ac	0	0.353642	0.18181
Control	0.0505829	0.0399157	0.0452586	0.0452524	0.00307937		Control	0.00790561	0.00171989	0.00264281	0.00408944	0.0019266			BS4	IgG	0.0091874	0.00244661	0.000743618
																H3K27ac	0.0274539	0.0555885	0.0568732
															Control	IgG	0.00754352	0.00235764	0.0019266
																H3K27ac	0.00996385	0.0208501	0.00307937
Fig 6D
	siCtrl	siSOX10-1	siSOX10-2
	1	6.14146	14.6665
	1	7.93929	16.9598
	1	7.14685	15.0654
IGFBP5	1	7.07587	15.5639
sem	0	0.520202	0.707406
